# Supplementary material for: A Media Analysis of the COVID-19 Tobacco Sales Ban in South Africa
Source: MDPI journal article supplement (doi:10.3390/ijerph20186733), 2023-09-07
Supplement: s1 [file s1]

| Article No. | Date of publication | Outlet name   | Author(s)      | Title of article                                                                                                        | URL                                                                                                                                                                                                                                                                                 |
|-------------|---------------------|---------------|----------------|-------------------------------------------------------------------------------------------------------------------------|-------------------------------------------------------------------------------------------------------------------------------------------------------------------------------------------------------------------------------------------------------------------------------------|
| 1           | 2020-08-10          | BizNews       | Jarryd Neves   | Tobacco ban: Let's call an end to this failed experiment                                                                | <a href="https://www.biznews.com/inside-covid-19/2020/08/10/tobacco-ban">https://www.biznews.com/inside-covid-19/2020/08/10/tobacco-ban</a>                                                                                                                                         |
| 2           | 2020-08-04          | BizNews       | Staff Reporter | Pick n Pay warns 50% drop in earnings; alcohol, tobacco to blame                                                        | <a href="https://www.biznews.com/sa-investing/2020/08/04/pick-n-pay">https://www.biznews.com/sa-investing/2020/08/04/pick-n-pay</a>                                                                                                                                                 |
| 3           | 2020-06-28          | BizNews       | Staff Reporter | NDZ wins battle for tobacco sales ban – Pretoria High Court                                                             | <a href="https://www.biznews.com/briefs/2020/06/28/ndz-wins-battle-for-tobacco-sales-ban-pretoria-high-court">https://www.biznews.com/briefs/2020/06/28/ndz-wins-battle-for-tobacco-sales-ban-pretoria-high-court</a>                                                               |
| 4           | 2020-08-14          | BizNews       | Jackie Cameron | How tobacco bosses play politicians: See this 8-point plan                                                              | <a href="https://www.biznews.com/undictated/2020/08/14/tobacco-bosses-corruption">https://www.biznews.com/undictated/2020/08/14/tobacco-bosses-corruption</a>                                                                                                                       |
| 5           | 2020-10-28          | BizNews       | Staff Reporter | Revealed: At least R300bn in tax revenue disappears through job losses, tobacco ban #MTBPS                              | <a href="https://www.biznews.com/budget/budget-2020/2020/10/28/tax-revenue">https://www.biznews.com/budget/budget-2020/2020/10/28/tax-revenue</a>                                                                                                                                   |
| 6           | 2020-05-28          | BizNews       | Alec Hogg      | Hearing the real reason for SA Government's legal tobacco ban                                                           | <a href="https://www.biznews.com/undictated/2020/05/28/reason-government-legal-tobacco-ban">https://www.biznews.com/undictated/2020/05/28/reason-government-legal-tobacco-ban</a>                                                                                                   |
| 7           | 2020-05-26          | BizNews       | Alec Hogg      | Inside Covid-19: R249pm medical aid for 1.2m household workers; Black tobacco farmers say Govt supporting crooks. Ep 39 | <a href="https://www.biznews.com/inside-covid-19/2020/05/26/covid-19-medical-aid-tobacco">https://www.biznews.com/inside-covid-19/2020/05/26/covid-19-medical-aid-tobacco</a>                                                                                                       |
| 8           | 2020-08-24          | Business Tech | Staff Reporter | Dlamini-Zuma can't promise that the cigarette ban won't return: report                                                  | <a href="https://businesstech.co.za/news/government/427926/dlamini-zuma-cant-promise-that-the-cigarette-ban-wont-return-report/">https://businesstech.co.za/news/government/427926/dlamini-zuma-cant-promise-that-the-cigarette-ban-wont-return-report/</a>                         |
| 9           | 2020-05-31          | Business Tech | Staff Reporter | Government wants 100% smoking ban in public areas                                                                       | <a href="https://businesstech.co.za/news/trending/403497/government-wants-100-smoking-ban-in-public-areas/">https://businesstech.co.za/news/trending/403497/government-wants-100-smoking-ban-in-public-areas/</a>                                                                   |
| 10          | 2020-08-06          | Business Tech | Staff Reporter | South Africa's ban on alcohol and cigarettes has not yet served its purpose: Mkhize                                     | <a href="https://businesstech.co.za/news/business/423558/south-africas-ban-on-alcohol-and-cigarettes-has-not-yet-served-its-purpose-mkhize/">https://businesstech.co.za/news/business/423558/south-africas-ban-on-alcohol-and-cigarettes-has-not-yet-served-its-purpose-mkhize/</a> |

|    |            |               |                |                                                                                                                 |                                                                                                                                                                                                                                                                                                                                             |
|----|------------|---------------|----------------|-----------------------------------------------------------------------------------------------------------------|---------------------------------------------------------------------------------------------------------------------------------------------------------------------------------------------------------------------------------------------------------------------------------------------------------------------------------------------|
| 11 | 2020-05-07 | Business Tech | Staff Reporter | The World Health Organisation on the coronavirus peak, ending lockdown, and the smoking ban in South Africa     | <a href="https://businesstech.co.za/news/government/395989/the-world-health-organisation-on-the-coronavirus-peak-ending-lockdown-and-the-smoking-ban-in-south-africa/">https://businesstech.co.za/news/government/395989/the-world-health-organisation-on-the-coronavirus-peak-ending-lockdown-and-the-smoking-ban-in-south-africa/</a>     |
| 12 | 2020-07-01 | Business Tech | Staff Writer   | Ramaphosa on South Africa's most controversial issues – including the sale of cigarettes, and the death penalty | <a href="https://businesstech.co.za/news/government/412681/ramaphosa-on-south-africas-most-controversial-issues-including-the-sale-of-cigarettes-and-the-death-penalty/">https://businesstech.co.za/news/government/412681/ramaphosa-on-south-africas-most-controversial-issues-including-the-sale-of-cigarettes-and-the-death-penalty/</a> |
| 13 | 2020-06-18 | Business Tech | Staff Reporter | Alcohol and tobacco sales are 'still open for debate': Ramaphosa                                                | <a href="https://businesstech.co.za/news/government/408875/alcohol-and-tobacco-sales-are-still-open-for-debate-ramaphosa/">https://businesstech.co.za/news/government/408875/alcohol-and-tobacco-sales-are-still-open-for-debate-ramaphosa/</a>                                                                                             |
| 14 | 2020-08-07 | Business Tech | Staff Reporter | 5 important things happening in South Africa today                                                              | <a href="https://businesstech.co.za/news/government/423644/5-important-things-happening-in-south-africa-today-856/">https://businesstech.co.za/news/government/423644/5-important-things-happening-in-south-africa-today-856/</a>                                                                                                           |
| 15 | 2020-08-26 | Business Tech | Staff Reporter | Dlamini-Zuma and Fita settle court battle over South Africa's cigarette ban – here are the conditions           | <a href="https://businesstech.co.za/news/lifestyle/428856/dlamini-zuma-and-fita-settle-court-battle-over-south-africas-cigarette-ban-here-are-the-conditions/">https://businesstech.co.za/news/lifestyle/428856/dlamini-zuma-and-fita-settle-court-battle-over-south-africas-cigarette-ban-here-are-the-conditions/</a>                     |
| 16 | 2020-07-17 | Business Tech | Staff Reporter | How much money government is losing in tax each month because of South Africa's alcohol and tobacco ban         | <a href="https://businesstech.co.za/news/finance/416987/how-much-money-government-is-losing-in-tax-each-month-because-of-south-africas-alcohol-and-tobacco-ban/">https://businesstech.co.za/news/finance/416987/how-much-money-government-is-losing-in-tax-each-month-because-of-south-africas-alcohol-and-tobacco-ban/</a>                 |
| 17 | 2020-07-21 | Business Tech | Staff Reporter | South Africa's cigarette ban could backfire spectacularly: research                                             | <a href="https://businesstech.co.za/news/lifestyle/418429/south-africas-cigarette-ban-could-backfire-spectacularly-research/">https://businesstech.co.za/news/lifestyle/418429/south-africas-cigarette-ban-could-backfire-spectacularly-research/</a>                                                                                       |
| 18 | 2020-08-14 | Business Tech | Staff Reporter | Counting the cost of South Africa's alcohol and cigarette sales ban                                             | <a href="https://businesstech.co.za/news/business/425334/counting-the-cost-of-south-africas-alcohol-and-cigarette-sales-ban/">https://businesstech.co.za/news/business/425334/counting-the-cost-of-south-africas-alcohol-and-cigarette-sales-ban/</a>                                                                                       |

|    |            |               |                |                                                                                      |                                                                                                                                                                                                                                                                                           |
|----|------------|---------------|----------------|--------------------------------------------------------------------------------------|-------------------------------------------------------------------------------------------------------------------------------------------------------------------------------------------------------------------------------------------------------------------------------------------|
| 19 | 2020-05-06 | Business Tech | Staff Reporter | Tobacco giant drops plan to sue government over South Africa's cigarette ban         | <a href="https://businesstech.co.za/news/business/395621/tobacco-giant-drops-plan-to-sue-government-over-south-africas-cigarette-ban/">https://businesstech.co.za/news/business/395621/tobacco-giant-drops-plan-to-sue-government-over-south-africas-cigarette-ban/</a>                   |
| 20 | 2020-08-04 | Business Tech | Staff Reporter | Pick n Pay speaks out against 'confusing, contradictory' alcohol and cigarette ban   | <a href="https://businesstech.co.za/news/business/422438/pick-n-pay-speaks-out-against-confusing-contradictory-alcohol-and-cigarette-ban/">https://businesstech.co.za/news/business/422438/pick-n-pay-speaks-out-against-confusing-contradictory-alcohol-and-cigarette-ban/</a>           |
| 21 | 2020-06-08 | Business Tech | Staff Reporter | Here's what will decide what ends South Africa's cigarette sales ban: Ramaphosa      | <a href="https://businesstech.co.za/news/business/405733/heres-what-will-decide-what-ends-south-africas-cigarette-sales-ban-ramaphosa/">https://businesstech.co.za/news/business/405733/heres-what-will-decide-what-ends-south-africas-cigarette-sales-ban-ramaphosa/</a>                 |
| 22 | 2020-07-24 | Business Tech | Staff Reporter | Another blow for business in court battle against South Africa's cigarette sales ban | <a href="https://businesstech.co.za/news/lifestyle/419573/another-blow-for-business-in-court-battle-against-south-africas-cigarette-sales-ban/">https://businesstech.co.za/news/lifestyle/419573/another-blow-for-business-in-court-battle-against-south-africas-cigarette-sales-ban/</a> |
| 23 | 2020-08-07 | Business Tech | Staff Reporter | Government imposed the smoking ban to free up 16 ICU beds: Tobacco company           | <a href="https://businesstech.co.za/news/government/423862/government-imposed-a-smoking-ban-to-free-up-16-icu-beds-tobacco-company/">https://businesstech.co.za/news/government/423862/government-imposed-a-smoking-ban-to-free-up-16-icu-beds-tobacco-company/</a>                       |
| 24 | 2020-05-12 | Business Tech | Staff Reporter | Alcohol and tobacco ban hurting Pick n Pay as it counts the cost of Covid-19         | <a href="https://businesstech.co.za/news/business/397015/alcohol-and-tobacco-ban-hurting-pick-n-pay-as-it-counts-the-cost-of-covid-19/">https://businesstech.co.za/news/business/397015/alcohol-and-tobacco-ban-hurting-pick-n-pay-as-it-counts-the-cost-of-covid-19/</a>                 |
| 25 | 2020-06-05 | Business Tech | Staff Reporter | South Africa's cigarette ban heads to court next week                                | <a href="https://businesstech.co.za/news/business/405345/south-africas-cigarette-ban-heads-to-court-next-week/">https://businesstech.co.za/news/business/405345/south-africas-cigarette-ban-heads-to-court-next-week/</a>                                                                 |
| 26 | 2020-06-30 | Business Tech | Staff Reporter | South Africa's cigarette ban backfire                                                | <a href="https://businesstech.co.za/news/finance/421096/south-africas-cigarette-ban-backfire/">https://businesstech.co.za/news/finance/421096/south-africas-cigarette-ban-backfire/</a>                                                                                                   |

|    |            |                |                                                                                        |                                                                                                    |                                                                                                                                                                                                                                                                                                                         |
|----|------------|----------------|----------------------------------------------------------------------------------------|----------------------------------------------------------------------------------------------------|-------------------------------------------------------------------------------------------------------------------------------------------------------------------------------------------------------------------------------------------------------------------------------------------------------------------------|
| 27 | 2020-08-04 | Daily Maverick | Narnia Bohler-Muller, Stephen Rule, Martin Bekker & Ben Roberts                        | Smoke and mirrors? Public perceptions on banning the sale of cigarettes                            | <a href="https://www.dailymaverick.co.za/article/2020-08-04-smoke-and-mirrors-public-perceptions-on-banning-the-sale-of-cigarettes/">https://www.dailymaverick.co.za/article/2020-08-04-smoke-and-mirrors-public-perceptions-on-banning-the-sale-of-cigarettes/</a>                                                     |
| 28 | 2020-04-09 | Daily Maverick | Savera Kalideen, Sharon Nyatsanza, Pamela Naidoo, Lorraine Govender and Catherine Egbe | Covid-19 Smoking Ban: The good, the bad and the very ugly                                          | <a href="https://www.dailymaverick.co.za/article/2020-04-09-covid-19-smoking-ban-the-good-the-bad-and-the-very-ugly/">https://www.dailymaverick.co.za/article/2020-04-09-covid-19-smoking-ban-the-good-the-bad-and-the-very-ugly/</a>                                                                                   |
| 29 | 2020-10-07 | Daily Maverick | Savera Kalideen and Sharon Nyatsanza                                                   | The mini budget is the ideal opportunity to whack up tobacco taxes – lockdown has shown us the way | <a href="https://www.dailymaverick.co.za/article/2020-10-21-the-mini-budget-is-the-ideal-opportunity-to-whack-up-tobacco-taxes-lockdown-has-shown-us-the-way/">https://www.dailymaverick.co.za/article/2020-10-21-the-mini-budget-is-the-ideal-opportunity-to-whack-up-tobacco-taxes-lockdown-has-shown-us-the-way/</a> |
| 30 | 2020-08-15 | Daily Maverick | Ferial Haffajee                                                                        | Ramaphosa takes South Africa out of hard lockdown, lifts cigarette and alcohol ban                 | <a href="https://www.dailymaverick.co.za/article/2020-08-15-ramaphosa-takes-south-africa-out-of-hard-lockdown-lifts-cigarette-and-alcohol-ban/">https://www.dailymaverick.co.za/article/2020-08-15-ramaphosa-takes-south-africa-out-of-hard-lockdown-lifts-cigarette-and-alcohol-ban/</a>                               |
| 31 | 2020-05-11 | Daily Maverick | Melinda Ferguson                                                                       | How I nearly sued the government to allow me to smoke                                              | <a href="https://www.dailymaverick.co.za/article/2020-05-11-how-i-nearly-sued-the-government-to-allow-me-to-smoke/">https://www.dailymaverick.co.za/article/2020-05-11-how-i-nearly-sued-the-government-to-allow-me-to-smoke/</a>                                                                                       |
| 32 | 2020-05-29 | Daily Maverick | Ferial Haffajee                                                                        | Dlamini Zuma's tobacco ban and the political divisions it is causing                               | <a href="https://www.dailymaverick.co.za/article/2020-05-29-dlamini-zumas-tobacco-ban-and-the-political-divisions-it-is-causing/">https://www.dailymaverick.co.za/article/2020-05-29-dlamini-zumas-tobacco-ban-and-the-political-divisions-it-is-causing/</a>                                                           |
| 33 | 2020-05-28 | Daily Maverick | Centre for Analytics and Behavioural Change                                            | South Africa's 24-hour trend report for 29 April 2020                                              | <a href="https://www.dailymaverick.co.za/article/2020-04-30-south-africas-24-hour-trend-report-for-29-april-2020/">https://www.dailymaverick.co.za/article/2020-04-30-south-africas-24-hour-trend-report-for-29-april-2020/</a>                                                                                         |

|    |            |                |                                             |                                                                                             |                                                                                                                                                                                                                                                                                                                   |
|----|------------|----------------|---------------------------------------------|---------------------------------------------------------------------------------------------|-------------------------------------------------------------------------------------------------------------------------------------------------------------------------------------------------------------------------------------------------------------------------------------------------------------------|
| 34 | 2020-04-09 | Daily Maverick | Des Erasmus                                 | Even presidents can change their minds, says Ramaphosa about cigarette U-turn               | <a href="https://www.dailymaverick.co.za/article/2020-05-05-even-presidents-can-change-their-minds-says-ramaphosa-about-cigarette-u-turn/">https://www.dailymaverick.co.za/article/2020-05-05-even-presidents-can-change-their-minds-says-ramaphosa-about-cigarette-u-turn/</a>                                   |
| 35 | 2020-06-26 | Daily Maverick | Vanessa Burger                              | Coalescence of RET forces behind cigarette ban suggests more at stake than 'nation's health | <a href="https://www.dailymaverick.co.za/opinionista/2020-05-25-coalescence-of-ret-forces-behind-cigarette-ban-suggests-more-at-stake-than-nations-health/">https://www.dailymaverick.co.za/opinionista/2020-05-25-coalescence-of-ret-forces-behind-cigarette-ban-suggests-more-at-stake-than-nations-health/</a> |
| 36 | 2020-09-27 | Daily Maverick | Sandisiwe Shoba                             | South Africans raise their concerns directly with President Ramaphosa                       | <a href="https://www.dailymaverick.co.za/article/2020-07-02-south-africans-raise-their-concerns-directly-with-president-ramaphosa/">https://www.dailymaverick.co.za/article/2020-07-02-south-africans-raise-their-concerns-directly-with-president-ramaphosa/</a>                                                 |
| 37 | 2020-04-30 | Daily Maverick | Maurice Smithers                            | Alcohol, alcohol harm and alcohol dependency: Putting things in perspective                 | <a href="https://www.dailymaverick.co.za/article/2020-04-13-alcohol-alcohol-harm-and-alcohol-dependency-putting-things-in-perspective/">https://www.dailymaverick.co.za/article/2020-04-13-alcohol-alcohol-harm-and-alcohol-dependency-putting-things-in-perspective/</a>                                         |
| 38 | 2020-05-25 | Daily Maverick | Stephen Grootes                             | Government's strange silence in the tobacco war of its own making                           | <a href="https://www.dailymaverick.co.za/article/2020-06-09-governments-strange-silence-in-the-tobacco-war-of-its-own-making/">https://www.dailymaverick.co.za/article/2020-06-09-governments-strange-silence-in-the-tobacco-war-of-its-own-making/</a>                                                           |
| 39 | 2020-05-04 | Daily Maverick | Maurice Smithers                            | Minimising health risks under Covid                                                         | <a href="https://www.dailymaverick.co.za/article/2020-05-27-more-must-be-done-to-limit-alcohol-access-as-is-case-with-tobacco/">https://www.dailymaverick.co.za/article/2020-05-27-more-must-be-done-to-limit-alcohol-access-as-is-case-with-tobacco/</a>                                                         |
| 40 | 2020-07-02 | Daily Maverick | Centre for Analytics and Behavioural Change | South Africa's 24-hour trend report — 13 April 2020                                         | <a href="https://www.dailymaverick.co.za/article/2020-04-13-south-africas-24-hour-trend-report-13-april-2020/">https://www.dailymaverick.co.za/article/2020-04-13-south-africas-24-hour-trend-report-13-april-2020/</a>                                                                                           |
| 41 | 2020-04-13 | Daily Maverick | Ed Stoddard                                 | UCT study finds soaring prices for illicit cigarettes burn smokers, suggests sin tax hike   | <a href="https://www.dailymaverick.co.za/article/2020-07-21-uct-study-finds-soaring-prices-for-illicit-cigarettes-burn-smokers-suggests-sin-tax-hike/">https://www.dailymaverick.co.za/article/2020-07-21-uct-study-finds-soaring-prices-for-illicit-cigarettes-burn-smokers-suggests-sin-tax-hike/</a>           |
| 42 | 2020-06-09 | Daily Maverick | Matthew van der Want                        | Tobacco ban: Try to explain 'rational' to an addict                                         | <a href="https://www.dailymaverick.co.za/opinionista/2020-06-28-tobacco-ban-try-to-explain-rational-to-an-addict/">https://www.dailymaverick.co.za/opinionista/2020-06-28-tobacco-ban-try-to-explain-rational-to-an-addict/</a>                                                                                   |

|    |            |                |                                             |                                                                                                |                                                                                                                                                                                                                                                                                                                     |
|----|------------|----------------|---------------------------------------------|------------------------------------------------------------------------------------------------|---------------------------------------------------------------------------------------------------------------------------------------------------------------------------------------------------------------------------------------------------------------------------------------------------------------------|
| 43 | 2020-05-27 | Daily Maverick | Ed Stoddard                                 | Pick n Pay flags above-50% interim profit fall, cites alcohol and tobacco bans                 | <a href="https://www.dailymaverick.co.za/article/2020-08-04-pick-n-pay-flags-above-50-interim-profit-fall-cites-alcohol-and-tobacco-bans/">https://www.dailymaverick.co.za/article/2020-08-04-pick-n-pay-flags-above-50-interim-profit-fall-cites-alcohol-and-tobacco-bans/</a>                                     |
| 44 | 2020-04-13 | Daily Maverick | Zacharia Motsumi                            | Covid-19 gave criminal syndicates control of the tobacco market – let's take back control      | <a href="https://www.dailymaverick.co.za/opinionista/2020-10-27-covid-19-gave-criminal-syndicates-control-of-the-tobacco-market-lets-take-back-control/">https://www.dailymaverick.co.za/opinionista/2020-10-27-covid-19-gave-criminal-syndicates-control-of-the-tobacco-market-lets-take-back-control/</a>         |
| 45 | 2020-07-21 | Daily Maverick | Greg Nicolson                               | As restrictions ease, Nkosazana Dlamini Zuma urges vigilance against second wave of Covid-19   | <a href="https://www.dailymaverick.co.za/article/2020-08-18-as-restrictions-ease-nkosazana-dlamini-zuma-urges-vigilance-against-second-wave-of-covid-19/">https://www.dailymaverick.co.za/article/2020-08-18-as-restrictions-ease-nkosazana-dlamini-zuma-urges-vigilance-against-second-wave-of-covid-19/</a>       |
| 46 | 2020-08-04 | Daily Maverick | Tebele Luthuli                              | Illicit trade in cigarettes and alcohol has thrived during lockdown                            | <a href="https://www.dailymaverick.co.za/opinionista/2020-06-05-illicit-trade-in-cigarettes-and-alcohol-has-thrived-during-lockdown/">https://www.dailymaverick.co.za/opinionista/2020-06-05-illicit-trade-in-cigarettes-and-alcohol-has-thrived-during-lockdown/</a>                                               |
| 47 | 2020-06-28 | Daily Maverick | Centre for Analytics and Behavioural Change | South Africa's 24-hour trend report – 4 May 2020                                               | <a href="https://www.dailymaverick.co.za/article/2020-05-05-south-africas-24-hour-trend-report-4-may-2020/">https://www.dailymaverick.co.za/article/2020-05-05-south-africas-24-hour-trend-report-4-may-2020/</a>                                                                                                   |
| 48 | 2020-08-26 | Daily Maverick | Cyril Ramaphosa                             | Reconsidering the position on tobacco was a collective decision                                | <a href="https://www.dailymaverick.co.za/article/2020-05-04-reconsidering-the-position-on-tobacco-was-a-collective-decision/">https://www.dailymaverick.co.za/article/2020-05-04-reconsidering-the-position-on-tobacco-was-a-collective-decision/</a>                                                               |
| 49 | 2020-08-04 | Daily Maverick | Centre for Analytics and Behavioural Chang  | South Africa's 24-hour trend report – the weekend                                              | <a href="https://www.dailymaverick.co.za/article/2020-05-25-south-africas-24-hour-trend-report-the-weekend/">https://www.dailymaverick.co.za/article/2020-05-25-south-africas-24-hour-trend-report-the-weekend/</a>                                                                                                 |
| 50 | 2020-08-18 | Daily Maverick | Karabo Mafolo                               | Sixty percent of lockdown arrests in Cape Town were shopkeepers selling alcohol and cigarettes | <a href="https://www.dailymaverick.co.za/article/2020-04-24-sixty-percent-of-lockdown-arrests-in-cape-town-were-shopkeepers-selling-alcohol-and-cigarettes/">https://www.dailymaverick.co.za/article/2020-04-24-sixty-percent-of-lockdown-arrests-in-cape-town-were-shopkeepers-selling-alcohol-and-cigarettes/</a> |
| 51 | 2020-06-05 | Daily Maverick | Terry Bell                                  | Smoke and memories                                                                             | <a href="https://www.dailymaverick.co.za/opinionista/2020-04-23-smoke-and-memories/">https://www.dailymaverick.co.za/opinionista/2020-04-23-smoke-and-memories/</a>                                                                                                                                                 |



|    |            |                |                                                                 |                                                                                                                  |                                                                                                                                                                                                                                                                                                                                                       |
|----|------------|----------------|-----------------------------------------------------------------|------------------------------------------------------------------------------------------------------------------|-------------------------------------------------------------------------------------------------------------------------------------------------------------------------------------------------------------------------------------------------------------------------------------------------------------------------------------------------------|
| 52 | 2020-09-11 | Daily Maverick | Sharon Nyatsanza                                                | Cigarette butts stink – and are a major cause of plastic pollution                                               | <a href="https://www.dailymaverick.co.za/opinionista/2020-07-30-cigarette-butts-stink-and-are-a-major-cause-of-plastic-pollution/">https://www.dailymaverick.co.za/opinionista/2020-07-30-cigarette-butts-stink-and-are-a-major-cause-of-plastic-pollution/</a>                                                                                       |
| 53 | 2020-05-05 | Daily Maverick | Sisi Ntombela and Meokgo Matuba                                 | This is why the tobacco ban must stay                                                                            | <a href="https://www.dailymaverick.co.za/opinionista/2020-05-29-this-is-why-the-tobacco-ban-must-stay/">https://www.dailymaverick.co.za/opinionista/2020-05-29-this-is-why-the-tobacco-ban-must-stay/</a>                                                                                                                                             |
| 54 | 2020-05-04 | Daily Maverick | Allen Gallagher, Mateusz Zatonski, Tom Hird and Lekan Ayo-Yusuf | The tobacco industry's hypocrisy on illicit trade                                                                | <a href="https://www.dailymaverick.co.za/article/2020-07-09-the-tobacco-industrys-hypocrisy-on-illicit-trade/">https://www.dailymaverick.co.za/article/2020-07-09-the-tobacco-industrys-hypocrisy-on-illicit-trade/</a>                                                                                                                               |
| 55 | 2020-07-30 | Daily Maverick | Christi Nortier                                                 | Big tobacco heads to court over sale ban, Denel sags under pandemic pressure and Level 3 conundrum for childcare | <a href="https://www.dailymaverick.co.za/article/2020-05-29-big-tobacco-heads-to-court-over-sale-ban-denel-sags-under-pandemic-pressure-and-level-3-conundrum-for-childcare/">https://www.dailymaverick.co.za/article/2020-05-29-big-tobacco-heads-to-court-over-sale-ban-denel-sags-under-pandemic-pressure-and-level-3-conundrum-for-childcare/</a> |
| 56 | 2020-07-30 | Daily Maverick | Marianne Merten                                                 | Alcohol and tobacco ban costs SA's collapsing economy an additional R1.7bn                                       | <a href="https://www.dailymaverick.co.za/article/2020-05-01-alcohol-and-tobacco-ban-costs-sas-collapsing-economy-an-additional-r1-7bn/">https://www.dailymaverick.co.za/article/2020-05-01-alcohol-and-tobacco-ban-costs-sas-collapsing-economy-an-additional-r1-7bn/</a>                                                                             |
| 57 | 2020-05-29 | Daily Maverick | Rebecca Davis                                                   | Unpacking the rationality of South Africa's lockdown regulations                                                 | <a href="https://www.dailymaverick.co.za/article/2020-05-14-unpacking-the-rationality-of-south-africas-lockdown-regulations/">https://www.dailymaverick.co.za/article/2020-05-14-unpacking-the-rationality-of-south-africas-lockdown-regulations/</a>                                                                                                 |
| 58 | 2020-07-09 | Daily Maverick | Lucas Ledwaba                                                   | A hazy future for some farmers despite tobacco ban lift                                                          | <a href="https://www.dailymaverick.co.za/article/2020-08-18-a-hazy-future-for-some-farmers-despite-tobacco-ban-lift-2/">https://www.dailymaverick.co.za/article/2020-08-18-a-hazy-future-for-some-farmers-despite-tobacco-ban-lift-2/</a>                                                                                                             |
| 59 | 2020-04-21 | Daily Maverick | Kopo Mapila                                                     | Lifting the veil: A philosophical investigation of the tobacco ban                                               | <a href="https://www.dailymaverick.co.za/opinionista/2020-06-10-lifting-the-veil-a-philosophical-investigation-of-the-tobacco-ban/">https://www.dailymaverick.co.za/opinionista/2020-06-10-lifting-the-veil-a-philosophical-investigation-of-the-tobacco-ban/</a>                                                                                     |
| 60 | 2020-05-29 | Daily Maverick | Ferial Haffajee                                                 | Dlamini Zuma turns cigarettes into illicit drugs as the underground economy takes over                           | <a href="https://www.dailymaverick.co.za/article/2020-06-12-dlamini-zuma-turns-cigarettes-into-illicit-drugs-as-the-underground-economy-takes-over/">https://www.dailymaverick.co.za/article/2020-06-12-dlamini-zuma-turns-cigarettes-into-illicit-drugs-as-the-underground-economy-takes-over/</a>                                                   |

|    |            |                |                                     |                                                                                                                                       |                                                                                                                                                                                                                                                                                                                                                                                               |
|----|------------|----------------|-------------------------------------|---------------------------------------------------------------------------------------------------------------------------------------|-----------------------------------------------------------------------------------------------------------------------------------------------------------------------------------------------------------------------------------------------------------------------------------------------------------------------------------------------------------------------------------------------|
| 61 | 2020-06-08 | Daily Maverick | Mukovhe Morris Masutha              | Profit before wellbeing: British American Tobacco vs Nkosazana Dlamini Zuma                                                           | <a href="https://www.dailymaverick.co.za/opinionista/2020-05-20-profit-before-wellbeing-british-american-tobacco-vs-nkosazana-dlamini-zuma/">https://www.dailymaverick.co.za/opinionista/2020-05-20-profit-before-wellbeing-british-american-tobacco-vs-nkosazana-dlamini-zuma/</a>                                                                                                           |
| 62 | 2020-08-10 | Daily Maverick | Daniel Steyn                        | Should alcohol, tobacco and outdoor exercise be banned?                                                                               | <a href="https://www.dailymaverick.co.za/article/2020-04-17-should-alcohol-tobacco-and-outdoor-exercise-be-banned/">https://www.dailymaverick.co.za/article/2020-04-17-should-alcohol-tobacco-and-outdoor-exercise-be-banned/</a>                                                                                                                                                             |
| 63 | 2020-05-01 | Daily Maverick | Zukiswa Pikoli                      | Black market cigarettes sales rise, Parliament passes February Budget, and education department hauled to court over school nutrition | <a href="https://www.dailymaverick.co.za/article/2020-06-14-black-market-cigarettes-sales-rise-parliament-passes-february-budget-and-education-department-hauled-to-court-over-school-nutrition/">https://www.dailymaverick.co.za/article/2020-06-14-black-market-cigarettes-sales-rise-parliament-passes-february-budget-and-education-department-hauled-to-court-over-school-nutrition/</a> |
| 64 | 2020-05-14 | Daily Maverick | Ivor Sarakinsky                     | Cigarettes and the Smoking Gun                                                                                                        | <a href="https://www.dailymaverick.co.za/opinionista/2020-05-06-cigarettes-and-the-smoking-gun/">https://www.dailymaverick.co.za/opinionista/2020-05-06-cigarettes-and-the-smoking-gun/</a>                                                                                                                                                                                                   |
| 65 | 2020-06-10 | Daily Maverick | David Clement and Martin van Staden | Prohibition and paternalism are always wrong, especially in a pandemic                                                                | <a href="https://www.dailymaverick.co.za/opinionista/2020-06-16-prohibition-and-paternalism-are-always-wrong-especially-in-a-pandemic/">https://www.dailymaverick.co.za/opinionista/2020-06-16-prohibition-and-paternalism-are-always-wrong-especially-in-a-pandemic/</a>                                                                                                                     |
| 66 | 2020-06-12 | Daily Maverick | Bianca Coleman                      | After the mad scramble for booze and cigarettes, reality bites                                                                        | <a href="https://www.dailymaverick.co.za/article/2020-03-27-after-the-mad-scramble-for-booze-and-cigarettes-reality-bites/">https://www.dailymaverick.co.za/article/2020-03-27-after-the-mad-scramble-for-booze-and-cigarettes-reality-bites/</a>                                                                                                                                             |
| 67 | 2020-05-20 | Daily Maverick | Professor Balthazar                 | Covid-19 regulations: Two judgments, two imperfect documents                                                                          | <a href="https://www.dailymaverick.co.za/opinionista/2020-06-29-covid-19-regulations-two-judgments-two-imperfect-documents/">https://www.dailymaverick.co.za/opinionista/2020-06-29-covid-19-regulations-two-judgments-two-imperfect-documents/</a>                                                                                                                                           |
| 68 | 2020-04-17 | Daily Maverick | Ed Stoddard                         | Prohibition: Social conservatism that's shattering working-class lives                                                                | <a href="https://www.dailymaverick.co.za/article/2020-08-10-prohibition-social-conservatism-thats-shattering-working-class-lives/">https://www.dailymaverick.co.za/article/2020-08-10-prohibition-social-conservatism-thats-shattering-working-class-lives/</a>                                                                                                                               |
| 69 | 2020-06-14 | Daily Maverick | Ferial Haffajee                     | Prohibition lockdown goes rogue                                                                                                       | <a href="https://www.dailymaverick.co.za/article/2020-04-20-prohibition-lockdown-goes-rogue/">https://www.dailymaverick.co.za/article/2020-04-20-prohibition-lockdown-goes-rogue/</a>                                                                                                                                                                                                         |
| 70 | 2020-06-16 | Daily Maverick | Ferial Haffajee                     | Ain't no drag getting hold of cigarettes                                                                                              | <a href="https://www.dailymaverick.co.za/article/2020-05-09-aint-no-drag-getting-hold-of-cigarettes/">https://www.dailymaverick.co.za/article/2020-05-09-aint-no-drag-getting-hold-of-cigarettes/</a>                                                                                                                                                                                         |



|    |            |                |                                             |                                                                                                                               |                                                                                                                                                                                                                                                                                                                                                                               |
|----|------------|----------------|---------------------------------------------|-------------------------------------------------------------------------------------------------------------------------------|-------------------------------------------------------------------------------------------------------------------------------------------------------------------------------------------------------------------------------------------------------------------------------------------------------------------------------------------------------------------------------|
| 71 | 2020-03-27 | Daily Maverick | Ed Stoddard                                 | Interview: SA's vaping industry is going up in smoke                                                                          | <a href="https://www.dailymaverick.co.za/article/2020-07-22-interview-sas-vaping-industry-is-going-up-in-smoke/">https://www.dailymaverick.co.za/article/2020-07-22-interview-sas-vaping-industry-is-going-up-in-smoke/</a>                                                                                                                                                   |
| 72 | 2020-06-29 | Daily Maverick | PSG                                         | Jacques Pauw and other industry-experts share their views in PSG's Think Big webinar series                                   | <a href="https://www.dailymaverick.co.za/article/2020-07-08-jacques-pauw-and-other-industry-experts-share-their-views-in-psgs-think-big-webinar-series/">https://www.dailymaverick.co.za/article/2020-07-08-jacques-pauw-and-other-industry-experts-share-their-views-in-psgs-think-big-webinar-series/</a>                                                                   |
| 73 | 2020-08-10 | Daily Maverick | Christi Nortier                             | Still no final word on Level 3 details, SANDF clears soldiers of lockdown killing, and cigarette ban defended in court papers | <a href="https://www.dailymaverick.co.za/article/2020-05-27-still-no-final-word-on-level-3-details-sandf-clears-soldiers-of-lockdown-killing-and-cigarette-ban-defended-in-court-papers/">https://www.dailymaverick.co.za/article/2020-05-27-still-no-final-word-on-level-3-details-sandf-clears-soldiers-of-lockdown-killing-and-cigarette-ban-defended-in-court-papers/</a> |
| 74 | 2020-04-20 | Daily Maverick | Narnia Bohle-Muller                         | Questions remain over the government's handling of supposedly vulnerable smokers                                              | <a href="https://www.dailymaverick.co.za/article/2020-07-12-questions-remain-over-the-governments-handling-of-supposedly-vulnerable-smokers/">https://www.dailymaverick.co.za/article/2020-07-12-questions-remain-over-the-governments-handling-of-supposedly-vulnerable-smokers/</a>                                                                                         |
| 75 | 2020-04-06 | Daily Maverick | Marianne Merten                             | As South Africa's capacity teeters under lockdown, the illicit economy costs public purse billions                            | <a href="https://www.dailymaverick.co.za/article/2020-05-06-as-south-africas-capacity-teeters-under-lockdown-the-illicit-economy-costs-public-purse-billions/">https://www.dailymaverick.co.za/article/2020-05-06-as-south-africas-capacity-teeters-under-lockdown-the-illicit-economy-costs-public-purse-billions/</a>                                                       |
| 76 | 2020-08-06 | Daily Maverick | Adriano Mazzotti                            | I am not an 'illicit tobacco kingpin' and am opposed to the illicit tobacco trade                                             | <a href="https://www.dailymaverick.co.za/article/2020-08-11-i-am-not-an-illicit-tobacco-kingpin-and-am-opposed-to-the-illicit-tobacco-trade/">https://www.dailymaverick.co.za/article/2020-08-11-i-am-not-an-illicit-tobacco-kingpin-and-am-opposed-to-the-illicit-tobacco-trade/</a>                                                                                         |
| 77 | 2020-05-09 | Daily Maverick | John Steenhuisen                            | Straight Talk: ANC lockdown is based on fear, not facts                                                                       | <a href="https://www.dailymaverick.co.za/opinionista/2020-06-05-straight-talk-anc-lockdown-is-based-on-fear-not-facts/">https://www.dailymaverick.co.za/opinionista/2020-06-05-straight-talk-anc-lockdown-is-based-on-fear-not-facts/</a>                                                                                                                                     |
| 78 | 2020-07-22 | Daily Maverick | Centre for Analytics and Behavioural Change | South Africa's 24-hour trend report – 3 May 2020                                                                              | <a href="https://www.dailymaverick.co.za/article/2020-05-04-south-africas-24-hour-trend-report-3-may-2020/">https://www.dailymaverick.co.za/article/2020-05-04-south-africas-24-hour-trend-report-3-may-2020/</a>                                                                                                                                                             |

|    |            |                |                                                       |                                                                                                                            |                                                                                                                                                                                                                                                                                                                                                                         |
|----|------------|----------------|-------------------------------------------------------|----------------------------------------------------------------------------------------------------------------------------|-------------------------------------------------------------------------------------------------------------------------------------------------------------------------------------------------------------------------------------------------------------------------------------------------------------------------------------------------------------------------|
| 79 | 2020-07-08 | Daily Maverick | Christi Nortier                                       | Witnesses tell of assault on Collins Khosa, arrested waste pickers held without trial, and more South Africans repatriated | <a href="https://www.dailymaverick.co.za/article/2020-06-10-witnesses-tell-of-assault-on-collins-khosa-arrested-waste-pickers-held-without-trial-and-more-south-africans-repatriated/">https://www.dailymaverick.co.za/article/2020-06-10-witnesses-tell-of-assault-on-collins-khosa-arrested-waste-pickers-held-without-trial-and-more-south-africans-repatriated/</a> |
| 80 | 2020-05-27 | Daily Maverick | Stephen Grootes                                       | Level 3 could be the short-term panacea the government needs right now                                                     | <a href="https://www.dailymaverick.co.za/article/2020-05-19-level-3-could-be-the-short-term-panacea-the-government-needs-right-now/">https://www.dailymaverick.co.za/article/2020-05-19-level-3-could-be-the-short-term-panacea-the-government-needs-right-now/</a>                                                                                                     |
| 81 | 2020-07-12 | Daily Maverick | Omphemetse S Sibanda                                  | We are not alone: US courts are also grappling with challenges to lockdown regulations                                     | <a href="https://www.dailymaverick.co.za/opinionista/2020-07-30-we-are-not-alone-us-courts-are-also-grappling-with-challenges-to-lockdown-regulations/">https://www.dailymaverick.co.za/opinionista/2020-07-30-we-are-not-alone-us-courts-are-also-grappling-with-challenges-to-lockdown-regulations/</a>                                                               |
| 82 | 2020-05-06 | Daily Maverick | Ed Stoddard                                           | Let's add 20% to the sin tax as an incentive to lift the prohibition                                                       | <a href="https://www.dailymaverick.co.za/article/2020-05-12-lets-add-20-to-the-sin-tax-as-an-incentive-to-lift-the-prohibition/">https://www.dailymaverick.co.za/article/2020-05-12-lets-add-20-to-the-sin-tax-as-an-incentive-to-lift-the-prohibition/</a>                                                                                                             |
| 83 | 2020-08-11 | Daily Maverick | Stephen Grootes                                       | Level 3 – a slightly less terrible option                                                                                  | <a href="https://www.dailymaverick.co.za/article/2020-05-26-level-3-a-slightly-less-terrible-option/">https://www.dailymaverick.co.za/article/2020-05-26-level-3-a-slightly-less-terrible-option/</a>                                                                                                                                                                   |
| 84 | 2020-06-05 | Daily Maverick | Centre for Analytics and Behavioural Change           | South Africa's 24 hour trend report – 30 April 2020                                                                        | <a href="https://www.dailymaverick.co.za/article/2020-05-01-south-africas-24-hour-trend-report-30-april-2020/">https://www.dailymaverick.co.za/article/2020-05-01-south-africas-24-hour-trend-report-30-april-2020/</a>                                                                                                                                                 |
| 85 | 2020-05-04 | Daily Maverick | Gary Pienaar, Michael Cosser and Narnia Bohler-Muller | Covid-19 and the role of the judiciary: Contradictions and confusion                                                       | <a href="https://www.dailymaverick.co.za/article/2020-07-15-covid-19-and-the-role-of-the-judiciary-contradictions-and-confusion/">https://www.dailymaverick.co.za/article/2020-07-15-covid-19-and-the-role-of-the-judiciary-contradictions-and-confusion/</a>                                                                                                           |
| 86 | 2020-06-10 | Daily Maverick | Zukiswa Pikoli                                        | Disaster regulations are not open to interpretation, as some ministers seem to think                                       | <a href="https://www.dailymaverick.co.za/article/2020-06-03-disaster-regulations-are-not-open-to-interpretation-as-some-ministers-seem-to-think/">https://www.dailymaverick.co.za/article/2020-06-03-disaster-regulations-are-not-open-to-interpretation-as-some-ministers-seem-to-think/</a>                                                                           |

|    |            |                |                                             |                                                                                                                                                      |                                                                                                                                                                                                                                                                                                                                                                                                                             |
|----|------------|----------------|---------------------------------------------|------------------------------------------------------------------------------------------------------------------------------------------------------|-----------------------------------------------------------------------------------------------------------------------------------------------------------------------------------------------------------------------------------------------------------------------------------------------------------------------------------------------------------------------------------------------------------------------------|
| 87 | 2020-05-19 | Daily Maverick | Centre for Analytics and Behavioural Change | South Africa's 24-hour trend report – 18 May 2020                                                                                                    | <a href="https://www.dailymaverick.co.za/article/2020-05-19-south-africas-24-hour-trend-report-18-may-2020/">https://www.dailymaverick.co.za/article/2020-05-19-south-africas-24-hour-trend-report-18-may-2020/</a>                                                                                                                                                                                                         |
| 88 | 2020-07-30 | Daily Maverick | Roger Stewart                               | Guided by the evidence? The problem is the pandemic, and the evidence, are moving targets                                                            | <a href="https://www.dailymaverick.co.za/opinionista/2020-06-11-guided-by-the-evidence-the-problem-is-the-pandemic-and-the-evidence-are-moving-targets/">https://www.dailymaverick.co.za/opinionista/2020-06-11-guided-by-the-evidence-the-problem-is-the-pandemic-and-the-evidence-are-moving-targets/</a>                                                                                                                 |
| 89 | 2020-05-12 | Daily Maverick | Mary de Haas                                | Learning from lockdown mistakes: The way forward                                                                                                     | <a href="https://www.dailymaverick.co.za/article/2020-05-22-learning-from-lockdown-mistakes-the-way-forward/">https://www.dailymaverick.co.za/article/2020-05-22-learning-from-lockdown-mistakes-the-way-forward/</a>                                                                                                                                                                                                       |
| 90 | 2020-05-26 | Daily Maverick | Marianne Merten                             | Ceding control to faceless securocrats and unaccountable governance structures chips away at SA's constitutional democracy, one broken bit at a time | <a href="https://www.dailymaverick.co.za/article/2020-05-25-ceding-control-to-faceless-securocrats-and-unaccountable-governance-structures-chips-away-at-sas-constitutional-democracy-one-broken-bit-at-a-time/">https://www.dailymaverick.co.za/article/2020-05-25-ceding-control-to-faceless-securocrats-and-unaccountable-governance-structures-chips-away-at-sas-constitutional-democracy-one-broken-bit-at-a-time/</a> |
| 91 | 2020-05-01 | Daily Maverick | J Brooks Spector                            | Prohibition, the stiffest drink of all                                                                                                               | <a href="https://www.dailymaverick.co.za/article/2020-04-24-prohibition-the-stiffest-drink-of-all/">https://www.dailymaverick.co.za/article/2020-04-24-prohibition-the-stiffest-drink-of-all/</a>                                                                                                                                                                                                                           |
| 92 | 2020-04-22 | eNCA           | Staff Reporter                              | Tobacco association fired-up over cigarette ban                                                                                                      | <a href="https://www.enca.com/news/tobacco-association-calls-cigarette-ban-be-lifted">https://www.enca.com/news/tobacco-association-calls-cigarette-ban-be-lifted</a>                                                                                                                                                                                                                                                       |
| 93 | 2020-04-30 | eNCA           | Staff Reporter                              | Tobacco association to fight cigarettes ban in court                                                                                                 | <a href="https://www.enca.com/news/tobacco-association-fight-cigarettes-ban-court">https://www.enca.com/news/tobacco-association-fight-cigarettes-ban-court</a>                                                                                                                                                                                                                                                             |
| 94 | 2020-08-06 | eNCA           | Staff Reporter                              | BATSA burns holes in tobacco ban                                                                                                                     | <a href="https://www.enca.com/news/batsa-says-tobacco-ban-unscientific-court-case">https://www.enca.com/news/batsa-says-tobacco-ban-unscientific-court-case</a>                                                                                                                                                                                                                                                             |
| 95 | 2020-05-28 | eNCA           | Staff Reporter                              | NCCC submits tobacco ban motivation                                                                                                                  | <a href="https://www.enca.com/analysis/nccc-submits-tobacco-ban-motivation">https://www.enca.com/analysis/nccc-submits-tobacco-ban-motivation</a>                                                                                                                                                                                                                                                                           |
| 96 | 2020-05-12 | eNCA           | Staff Reporter                              | HSRC: Most citizens sticking to tobacco ban                                                                                                          | <a href="https://www.enca.com/news/most-sa-adhere-lockdown-regulations-around-banned-tobacco">https://www.enca.com/news/most-sa-adhere-lockdown-regulations-around-banned-tobacco</a>                                                                                                                                                                                                                                       |
| 97 | 2020-07-03 | eNCA           | Staff Reporter                              | Tobacco ban: Fita files application for leave to appeal                                                                                              | <a href="https://www.enca.com/news/tobacco-ban-fita-files-application-leave-appeal">https://www.enca.com/news/tobacco-ban-fita-files-application-leave-appeal</a>                                                                                                                                                                                                                                                           |

|     |            |      |                |                                                               |                                                                                                                                                                                 |
|-----|------------|------|----------------|---------------------------------------------------------------|---------------------------------------------------------------------------------------------------------------------------------------------------------------------------------|
| 98  | 2020-07-22 | eNCA | Staff Reporter | Govt's alcohol, tobacco ban tweet befuddles SA                | <a href="https://www.enca.com/news/Govt-alcohol-tobacco-ban-tweet-befudles-SA">https://www.enca.com/news/Govt-alcohol-tobacco-ban-tweet-befudles-SA</a>                         |
| 99  | 2020-07-09 | eNCA | Staff Reporter | Tobacco ban appeal to be heard next week                      | <a href="https://www.enca.com/news/tobacco-ban-appeal-be-heard-next-week">https://www.enca.com/news/tobacco-ban-appeal-be-heard-next-week</a>                                   |
| 100 | 2020-06-10 | eNCA | Staff Reporter | SA Lockdown: Tobacco battle in court                          | <a href="https://www.enca.com/news/sa-lockdown-tobacco-battle-court">https://www.enca.com/news/sa-lockdown-tobacco-battle-court</a>                                             |
| 101 | 2020-07-15 | eNCA | Staff Reporter | Fita asks for leave to appeal tobacco ban                     | <a href="https://www.enca.com/news/fita-asks-leave-appeal-tobacco-ban">https://www.enca.com/news/fita-asks-leave-appeal-tobacco-ban</a>                                         |
| 102 | 2020-06-05 | eNCA | Staff Reporter | No postponement of tobacco challenge                          | <a href="https://www.enca.com/news/no-postponement-tobacco-challenge">https://www.enca.com/news/no-postponement-tobacco-challenge</a>                                           |
| 103 | 2020-05-12 | eNCA | Staff Reporter | SA Lockdown: Court battle over tobacco ban on hold            | <a href="https://www.enca.com/news/court-battle-over-tobacco-ban-hold">https://www.enca.com/news/court-battle-over-tobacco-ban-hold</a>                                         |
| 104 | 2020-05-11 | eNCA | Staff Reporter | Tobacco association heads to court to fight ban               | <a href="https://www.enca.com/news/tobacco-heads-court-fight-ban">https://www.enca.com/news/tobacco-heads-court-fight-ban</a>                                                   |
| 105 | 2020-04-13 | eNCA | Staff Reporter | Calls to lift cigarette sales ban                             | <a href="https://www.enca.com/news/watch-calls-lift-cigarette-sales-ban">https://www.enca.com/news/watch-calls-lift-cigarette-sales-ban</a>                                     |
| 106 | 2020-05-04 | eNCA | Staff Reporter | Ramaphosa part of decision to ban sale of tobacco products    | <a href="https://www.enca.com/news/ramaphosa-part-decision-ban-sale-tobacco-products">https://www.enca.com/news/ramaphosa-part-decision-ban-sale-tobacco-products</a>           |
| 107 | 2020-05-06 | eNCA | Staff Reporter | BAT won't pursue court action against cigarettes ban          | <a href="https://www.enca.com/news/bat-wont-pursue-court-action-against-cigarettes-ban">https://www.enca.com/news/bat-wont-pursue-court-action-against-cigarettes-ban</a>       |
| 108 | 2020-05-31 | eNCA | Staff Reporter | Ramaphosa: I should've announced the re-banning of cigarettes | <a href="https://www.enca.com/news/ramaphosa-i-shouldve-announced-re-banning-cigarettes">https://www.enca.com/news/ramaphosa-i-shouldve-announced-re-banning-cigarettes</a>     |
| 109 | 2020-08-26 | eNCA | Staff Reporter | Fita wants govt engagement should cigarette ban return        | <a href="https://www.enca.com/news/fita-wants-govt-engagement-should-cigarette-ban-return">https://www.enca.com/news/fita-wants-govt-engagement-should-cigarette-ban-return</a> |
| 110 | 2020-08-26 | eNCA | Staff Reporter | Fita settles tobacco court case with government               | <a href="https://www.enca.com/news/fita-settles-tobacco-court-case-govt">https://www.enca.com/news/fita-settles-tobacco-court-case-govt</a>                                     |
| 111 | 2020-08-01 | eNCA | Staff Reporter | Fita heads to Supreme Court of Appeal over tobacco ban        | <a href="https://www.enca.com/news/fita-heads-supreme-court-appeal-over-tobacco-ban">https://www.enca.com/news/fita-heads-supreme-court-appeal-over-tobacco-ban</a>             |
| 112 | 2020-04-18 | eNCA | Staff Reporter | Tobacco association taking government to court                | <a href="https://www.enca.com/news/tobacco-association-taking-government-court">https://www.enca.com/news/tobacco-association-taking-government-court</a>                       |

|     |            |                  |                    |                                                                                  |                                                                                                                                                                                                                                         |
|-----|------------|------------------|--------------------|----------------------------------------------------------------------------------|-----------------------------------------------------------------------------------------------------------------------------------------------------------------------------------------------------------------------------------------|
| 113 | 2020-05-29 | eNCA             | Staff Reporter     | Cele: Proof of cigarette purchases required                                      | <a href="https://www.enca.com/news/cele-doubles-down-smoking-comments">https://www.enca.com/news/cele-doubles-down-smoking-comments</a>                                                                                                 |
| 114 | 2020-05-04 | eNCA             | Staff Reporter     | British American Tobacco sets deadline for government to revoke ban              | <a href="https://www.enca.com/news/british-american-tobacco-sets-deadline-government-revoke-ban">https://www.enca.com/news/british-american-tobacco-sets-deadline-government-revoke-ban</a>                                             |
| 115 | 2020-08-07 | eNCA             | Staff Reporter     | Cigarette shipment to rehab centre justified: Lukhele                            | <a href="https://www.enca.com/news/cigarette-shipment-rehab-centre-justified-lukhele">https://www.enca.com/news/cigarette-shipment-rehab-centre-justified-lukhele</a>                                                                   |
| 116 | 2020-08-07 | eNCA             | Staff Reporter     | SA lockdown: Tobacco industry fired up and ready to roll                         | <a href="https://www.enca.com/news/sa-lockdown-tobacco-industry-prepares-get-things-rolling">https://www.enca.com/news/sa-lockdown-tobacco-industry-prepares-get-things-rolling</a>                                                     |
| 117 | 2020-08-07 | Eye Witness News | Kaylynn Palm       | Judgment in tobacco sale ban matter between BATSA, COGTA has been reserved       | <a href="https://ewn.co.za/2020/08/07/judgment-in-tobacco-sale-ban-between-british-american-tobacco-cogta-reserved">https://ewn.co.za/2020/08/07/judgment-in-tobacco-sale-ban-between-british-american-tobacco-cogta-reserved</a>       |
| 118 | 2020-08-05 | Eye Witness News | Kaylynn Palm       | British American Tobacco's cigarette sale ban bid to be heard in court           | <a href="https://ewn.co.za/2020/08/05/british-american-tobacco-s-cigarette-sale-ban-bid-to-be-heard-in-court">https://ewn.co.za/2020/08/05/british-american-tobacco-s-cigarette-sale-ban-bid-to-be-heard-in-court</a>                   |
| 119 | 2020-06-01 | Eye Witness News | Clement Manyathela | Ramaphosa admits he should have explained govt's U-turn on cigarette sales       | <a href="https://ewn.co.za/2020/06/01/ramaphosa-admits-he-should-have-explained-govt-s-u-turn-on-cigarette-sales">https://ewn.co.za/2020/06/01/ramaphosa-admits-he-should-have-explained-govt-s-u-turn-on-cigarette-sales</a>           |
| 120 | 2020-05-03 | Eye Witness News | Ayanda Nyati       | ANCWL: Attack on Dlamini-Zuma over tobacco ban aims to pit her against Ramaphosa | <a href="https://ewn.co.za/2020/05/03/ancwl-attack-on-dlamini-zuma-over-tobacco-ban-aims-to-pit-her-against-ramaphosa">https://ewn.co.za/2020/05/03/ancwl-attack-on-dlamini-zuma-over-tobacco-ban-aims-to-pit-her-against-ramaphosa</a> |
| 121 | 2020-04-30 | Eye Witness News | AFP                | South Africa's cigarette ban lights up a row                                     | <a href="https://ewn.co.za/2020/04/30/south-africa-s-cigarette-ban-lights-up-a-row">https://ewn.co.za/2020/04/30/south-africa-s-cigarette-ban-lights-up-a-row</a>                                                                       |
| 122 | 2020-08-12 | Eye Witness News | Kaylynn Palm       | Industry players mum on reports of lifting of tobacco, alcohol sale bans         | <a href="https://ewn.co.za/2020/08/12/industry-players-mum-on-reports-of-lifting-of-tobacco-alcohol-sale-bans">https://ewn.co.za/2020/08/12/industry-players-mum-on-reports-of-lifting-of-tobacco-alcohol-sale-bans</a>                 |
| 123 | 2020-08-10 | Eye Witness News | Staff Reporter     | Too soon to tell if govt winning war against illegal cigarettes - ISS            | <a href="https://www.enca.com/news/too-soon-tell-if-govt-winning-war-against-illegal-cigarettes-iss">https://www.enca.com/news/too-soon-tell-if-govt-winning-war-against-illegal-cigarettes-iss</a>                                     |

|     |            |                  |                   |                                                                                  |                                                                                                                                                                                                                                             |
|-----|------------|------------------|-------------------|----------------------------------------------------------------------------------|---------------------------------------------------------------------------------------------------------------------------------------------------------------------------------------------------------------------------------------------|
| 124 | 2020-08-18 | Eye Witness News | Kaylynn Palm      | Smokers delighted to be able to buy favourite cigarette brands again             | <a href="https://ewn.co.za/2020/08/18/smokers-delighted-to-be-able-to-buy-favourite-cigarette-brands-again">https://ewn.co.za/2020/08/18/smokers-delighted-to-be-able-to-buy-favourite-cigarette-brands-again</a>                           |
| 125 | 2020-08-18 | Eye Witness News | Kaylynn Palm      | Calls for stricter controls after booze and tobacco sale bans lifted             | <a href="https://ewn.co.za/2020/08/18/limit-adverts-calls-for-stricter-controls-after-booze-and-tobacco-bans-lifted">https://ewn.co.za/2020/08/18/limit-adverts-calls-for-stricter-controls-after-booze-and-tobacco-bans-lifted</a>         |
| 126 | 2020-08-18 | Eye Witness News | Theto Mahlakoana  | I don't tell Cabinet what to do – NDZ responds to criticism over lockdown bans   | <a href="https://ewn.co.za/2020/08/18/i-don-t-tell-cabinet-what-to-do-ndz-responds-to-ban-criticism">https://ewn.co.za/2020/08/18/i-don-t-tell-cabinet-what-to-do-ndz-responds-to-ban-criticism</a>                                         |
| 127 | 2020-08-18 | Eye Witness News | Lauren Isaacs     | Don't panic buy! PnP welcomes liquor and cigarette buyers                        | <a href="https://ewn.co.za/2020/08/18/don-t-panic-buy-pnp-welcomes-liquor-and-cigarette-buyers">https://ewn.co.za/2020/08/18/don-t-panic-buy-pnp-welcomes-liquor-and-cigarette-buyers</a>                                                   |
| 128 | 2020-08-18 | Eye Witness News | Veronica Mokhoali | Money's no issue: R5k bill & more as shoppers queue to stock up after booze ban  | <a href="https://ewn.co.za/2020/08/18/r5k-liquor-bill-and-more-as-shoppers-queue-to-stock-up-after-ban">https://ewn.co.za/2020/08/18/r5k-liquor-bill-and-more-as-shoppers-queue-to-stock-up-after-ban</a>                                   |
| 129 | 2020-08-18 | Eye Witness News | Veronica Mokhoali | Bottoms up! Long queues outside liquor stores in Joburg already                  | <a href="https://ewn.co.za/2020/08/18/long-queues-already-begin-outside-liquor-stores-in-johannesburg">https://ewn.co.za/2020/08/18/long-queues-already-begin-outside-liquor-stores-in-johannesburg</a>                                     |
| 130 | 2020-08-18 | Eye Witness News | Veronica Mokhoali | Some S. Africans show cautious optimism over eased rules under alert level 2     | <a href="https://ewn.co.za/2020/08/18/sa-moves-to-alert-level-2-some-citizens-show-cautious-optimism-over-eased-rules">https://ewn.co.za/2020/08/18/sa-moves-to-alert-level-2-some-citizens-show-cautious-optimism-over-eased-rules</a>     |
| 131 | 2020-08-17 | Eye Witness News | Kayleen Morgan    | Tobacco, alcohol, inter-provincial travel & curfew - level 2 lockdown amendments | <a href="https://ewn.co.za/video/11787/tobacco--alcohol-inter-provincial-travel---curfew----level-2-lockdown-amendments">https://ewn.co.za/video/11787/tobacco--alcohol-inter-provincial-travel---curfew----level-2-lockdown-amendments</a> |
| 132 | 2020-08-17 | Eye Witness News | Staff Reporter    | Rand slips as stock market gains on easing lockdown rules                        | <a href="https://ewn.co.za/2020/08/17/rand-slips-as-stock-market-gains-on-easing-lockdown-rules">https://ewn.co.za/2020/08/17/rand-slips-as-stock-market-gains-on-easing-lockdown-rules</a>                                                 |
| 133 | 2020-08-17 | Eye Witness News | Veronica Mokhoali | Safety in spotlight as retailers prepare for return of alcohol, cigarettes sales | <a href="https://ewn.co.za/2020/08/17/safety-in-spotlight-as-retailers-prepare-for-return-of-alcohol-cigarettes-sales">https://ewn.co.za/2020/08/17/safety-in-spotlight-as-retailers-prepare-for-return-of-alcohol-cigarettes-sales</a>     |



|     |            |                  |                                |                                                                              |                                                                                                                                                                                                                                       |
|-----|------------|------------------|--------------------------------|------------------------------------------------------------------------------|---------------------------------------------------------------------------------------------------------------------------------------------------------------------------------------------------------------------------------------|
| 134 | 2020-08-17 | Eye Witness News | Thapelo Lekabe                 | Dlamini-Zuma hits out at those blaming her for tough lockdown regulations    | <a href="https://ewn.co.za/2020/08/17/dlamini-zuma-hits-out-at-those-blaming-her-for-tough-lockdown-regulations">https://ewn.co.za/2020/08/17/dlamini-zuma-hits-out-at-those-blaming-her-for-tough-lockdown-regulations</a>           |
| 135 | 2020-08-17 | Eye Witness News | Staff Reporter                 | No specific regulations on sale of tobacco products, says Dlamini-Zuma       | <a href="https://ewn.co.za/2020/08/17/watch-live-nccc-ministers-brief-media-on">https://ewn.co.za/2020/08/17/watch-live-nccc-ministers-brief-media-on</a>                                                                             |
| 136 | 2020-08-16 | Eye Witness News | Kevin Brandt                   | DA slams international travel ban, 10pm curfew & limited school attendance   | <a href="https://ewn.co.za/2020/08/16/da-slams-international-travel-ban-10pm-curfew-and-limited-school-attendance">https://ewn.co.za/2020/08/16/da-slams-international-travel-ban-10pm-curfew-and-limited-school-attendance</a>       |
| 137 | 2020-08-16 | Eye Witness News | Ayanda Nyathi                  | Political parties react; EFF rejects easing of lockdown regulations          | <a href="https://ewn.co.za/2020/08/16/political-parties-react-eff-rejects-easing-of-lockdown-regulations">https://ewn.co.za/2020/08/16/political-parties-react-eff-rejects-easing-of-lockdown-regulations</a>                         |
| 138 | 2020-08-16 | Eye Witness News | Eduard De Kock & Ayanda Nyathi | As restaurants get ready for recovery, Fita to continue tobacco legal battle | <a href="https://ewn.co.za/2020/08/16/as-restaurants-get-ready-for-recovery-fita-to-continue-tobacco-legal-battle">https://ewn.co.za/2020/08/16/as-restaurants-get-ready-for-recovery-fita-to-continue-tobacco-legal-battle</a>       |
| 139 | 2020-08-16 | Eye Witness News | Ray White                      | 'Lifting of sales ban on alcohol, cigarettes long overdue'                   | <a href="https://ewn.co.za/2020/08/16/lifting-of-ban-on-alcohol-cigarettes-long-overdue">https://ewn.co.za/2020/08/16/lifting-of-ban-on-alcohol-cigarettes-long-overdue</a>                                                           |
| 140 | 2020-08-15 | Eye Witness News | Staff Reporter                 | Booze & cigarette sales unbanned                                             | <a href="https://ewn.co.za/live/LIVE-BLOG--Will-booze-and-cigarette-sales-be-unbanned-Ramaphosa-addresses-the-nation">https://ewn.co.za/live/LIVE-BLOG--Will-booze-and-cigarette-sales-be-unbanned-Ramaphosa-addresses-the-nation</a> |
| 141 | 2020-08-15 | Eye Witness News | Staff Reporter                 | FULL SPEECH: President Cyril Ramaphosa announces level 2 lockdown            | <a href="https://ewn.co.za/2020/08/15/full-speech-president-cyril-ramaphosa-announces-level-2-lockdown">https://ewn.co.za/2020/08/15/full-speech-president-cyril-ramaphosa-announces-level-2-lockdown</a>                             |
| 142 | 2020-08-15 | Eye Witness News | Shimoney Regter                | SA lockdown: Ramaphosa to address the nation tonight                         | <a href="https://ewn.co.za/2020/08/15/sa-lockdown-ramaphosa-to-address-the-nation-tonight">https://ewn.co.za/2020/08/15/sa-lockdown-ramaphosa-to-address-the-nation-tonight</a>                                                       |
| 143 | 2020-08-15 | Eye Witness News | Sifiso Zulu                    | SCA grants Fita leave to appeal dismissal of tobacco sales ban               | <a href="https://ewn.co.za/2020/08/15/sca-grants-fita-leave-to-appeal-dismissal-of-tobacco-sales-ban">https://ewn.co.za/2020/08/15/sca-grants-fita-leave-to-appeal-dismissal-of-tobacco-sales-ban</a>                                 |

|     |            |                  |                 |                                                                                 |                                                                                                                                                                                                                                                 |
|-----|------------|------------------|-----------------|---------------------------------------------------------------------------------|-------------------------------------------------------------------------------------------------------------------------------------------------------------------------------------------------------------------------------------------------|
| 144 | 2020-08-15 | Eye Witness News | Kaylynn Palm    | City of CT ready for talks to ease lockdown, unban sale of booze and cigarettes | <a href="https://ewn.co.za/2020/08/15/city-of-ct-ready-for-talks-to-ease-lockdown-unban-booze-and-cigarettes">https://ewn.co.za/2020/08/15/city-of-ct-ready-for-talks-to-ease-lockdown-unban-booze-and-cigarettes</a>                           |
| 145 | 2020-08-13 | Eye Witness News | Mia Lindeque    | Cosatu hopes Ramaphosa will soon announce reopening of more sectors of economy  | <a href="https://ewn.co.za/2020/08/13/cosatu-hopes-ramaphosa-will-soon-announce-reopening-of-more-sectors-of-economy">https://ewn.co.za/2020/08/13/cosatu-hopes-ramaphosa-will-soon-announce-reopening-of-more-sectors-of-economy</a>           |
| 146 | 2020-08-12 | Eye Witness News | Bonga Dlulane   | Cosatu calls for alcohol sales ban to be lifted, says black market thriving     | <a href="https://ewn.co.za/2020/08/12/cosatu-calls-for-alcohol-sales-ban-to-be-lifted-says-black-market-thriving">https://ewn.co.za/2020/08/12/cosatu-calls-for-alcohol-sales-ban-to-be-lifted-says-black-market-thriving</a>                   |
| 147 | 2020-08-12 | Eye Witness News | Lauren Isaacs   | Paarl police make tobacco bust of products worth more than R1 million           | <a href="https://ewn.co.za/2020/08/12/paarl-police-make-tobacco-bust-of-products-worth-more-than-r1-million">https://ewn.co.za/2020/08/12/paarl-police-make-tobacco-bust-of-products-worth-more-than-r1-million</a>                             |
| 148 | 2020-08-12 | Eye Witness News | Nkosikhona Duma | DA's Steenhuisen: Ramaphosa must end hard lockdown now                          | <a href="https://ewn.co.za/2020/08/12/john-steenhuisen-it-s-time-to-rebuild-economy-end-hard-lockdown">https://ewn.co.za/2020/08/12/john-steenhuisen-it-s-time-to-rebuild-economy-end-hard-lockdown</a>                                         |
| 149 | 2020-08-11 | Eye Witness News | Nkosikhona Duma | Cosatu backs calls to lift ban on alcohol sales, but with conditions            | <a href="https://ewn.co.za/2020/08/11/cosatu-backs-calls-to-lift-ban-on-alcohol-sales-but-with-conditions">https://ewn.co.za/2020/08/11/cosatu-backs-calls-to-lift-ban-on-alcohol-sales-but-with-conditions</a>                                 |
| 150 | 2020-08-07 | Eye Witness News | Kaylynn Palm    | While waiting on court ruling, Batsa vows to fight illicit cigarette trade      | <a href="https://ewn.co.za/2020/08/07/while-waiting-on-court-ruling-batsa-vows-to-keep-fighting-illicit-cigarette-trade">https://ewn.co.za/2020/08/07/while-waiting-on-court-ruling-batsa-vows-to-keep-fighting-illicit-cigarette-trade</a>     |
| 151 | 2020-08-06 | Eye Witness News | Nkosikhona Duma | Mkhize: SA not ready to lift ban on sales of tobacco, alcohol yet               | <a href="https://ewn.co.za/2020/08/06/mkhize-sa-not-ready-to-lift-ban-on-sale-of-tobacco-alcohol-yet">https://ewn.co.za/2020/08/06/mkhize-sa-not-ready-to-lift-ban-on-sale-of-tobacco-alcohol-yet</a>                                           |
| 152 | 2020-08-06 | Eye Witness News | Kaylynn Palm    | Dlamini-Zuma has a duty to prevent spread of COVID-19 & save lives, court told  | <a href="https://ewn.co.za/2020/08/06/dlamini-zuma-has-a-duty-to-prevent-spread-of-covid-19-and-save-lives-court-told">https://ewn.co.za/2020/08/06/dlamini-zuma-has-a-duty-to-prevent-spread-of-covid-19-and-save-lives-court-told</a>         |
| 153 | 2020-08-06 | Eye Witness News | Eyewitness News | Liquor, cigarette ban in place to protect lives in pandemic—Dlamini-Zuma lawyer | <a href="https://ewn.co.za/2020/08/06/liquor-cigarette-ban-in-place-to-save-protect-lives-in-pandemic-dlamini-zuma-lawyer">https://ewn.co.za/2020/08/06/liquor-cigarette-ban-in-place-to-save-protect-lives-in-pandemic-dlamini-zuma-lawyer</a> |

|     |            |                  |                                |                                                                                  |                                                                                                                                                                                                                                           |
|-----|------------|------------------|--------------------------------|----------------------------------------------------------------------------------|-------------------------------------------------------------------------------------------------------------------------------------------------------------------------------------------------------------------------------------------|
| 154 | 2020-08-06 | Eye Witness News | Lauren Isaacs                  | Farmers on the brink of ruin due to alcohol and tobacco ban: SAAI                | <a href="https://ewn.co.za/2020/08/06/famers-on-the-brink-of-ruin-due-to-alcohol-and-tobacco-ban-saa">https://ewn.co.za/2020/08/06/famers-on-the-brink-of-ruin-due-to-alcohol-and-tobacco-ban-saa</a>                                     |
| 155 | 2020-08-06 | Eye Witness News | Regan Thaw & Veronica Mokhoali | BLSA: Govt must consider economy's recovery when deciding on alcohol,tobacco ban | <a href="https://ewn.co.za/2020/08/06/blsa-govt-must-consider-economy-s-recovery-when-deciding-on-alcohol-tobacco-ban">https://ewn.co.za/2020/08/06/blsa-govt-must-consider-economy-s-recovery-when-deciding-on-alcohol-tobacco-ban</a>   |
| 156 | 2020-08-05 | Eye Witness News | Veronica Mokhoali              | BLSA backs call to lift bans on sale of alcohol, cigarettes                      | <a href="https://ewn.co.za/2020/08/05/blsa-backs-call-to-lift-bans-on-sale-of-alcohol-cigarettes">https://ewn.co.za/2020/08/05/blsa-backs-call-to-lift-bans-on-sale-of-alcohol-cigarettes</a>                                             |
| 157 | 2020-08-05 | Eye Witness News | Kaylynn Palm                   | Tobacco sales ban violates consumer rights, free trade rights - Batsa            | <a href="https://ewn.co.za/2020/08/05/tobacco-sales-ban-violates-consumer-rights-free-trade-rights-batsa">https://ewn.co.za/2020/08/05/tobacco-sales-ban-violates-consumer-rights-free-trade-rights-batsa</a>                             |
| 158 | 2020-08-05 | Eye Witness News | Judith February                | JUDITH FEBRUARY: Nothing about democratic progress is inevitable                 | <a href="https://ewn.co.za/2020/08/05/judith-february-nothing-about-democratic-progress-is-inevitable">https://ewn.co.za/2020/08/05/judith-february-nothing-about-democratic-progress-is-inevitable</a>                                   |
| 159 | 2020-08-05 | Eye Witness News | Regan Thaw & Kaylynn Palm      | British American Tobacco argues in court why cigarette sale ban must be scrapped | <a href="https://ewn.co.za/2020/08/05/british-american-tobacco-argues-in-court-why-cigarette-sale-ban-must-be-scrapped">https://ewn.co.za/2020/08/05/british-american-tobacco-argues-in-court-why-cigarette-sale-ban-must-be-scrapped</a> |
| 160 | 2020-08-05 | Eye Witness News | Staff Reporter                 | Cost of tobacco ban outweighs benefit'-Industry challenges ban in WC High Court  | <a href="https://ewn.co.za/2020/08/05/cost-of-tobacco-ban-outweighs-benefit-industry-challenges-ban-in-wc-high-court">https://ewn.co.za/2020/08/05/cost-of-tobacco-ban-outweighs-benefit-industry-challenges-ban-in-wc-high-court</a>     |
| 161 | 2020-08-04 | Eye Witness News | Bonga Dlulane                  | SCA agrees to urgently hear Fita appeal bid in cigarette sales ban matter        | <a href="https://ewn.co.za/2020/08/04/sca-agrees-to-urgently-hear-fita-appeal-bid-in-cigarette-sales-ban-matter">https://ewn.co.za/2020/08/04/sca-agrees-to-urgently-hear-fita-appeal-bid-in-cigarette-sales-ban-matter</a>               |
| 162 | 2020-08-04 | Eye Witness News | Nkosikhona Duma                | The DA wants alcohol, tobacco ban lifted with immediate effect                   | <a href="https://ewn.co.za/2020/08/04/the-da-wants-alcohol-tobacco-ban-lifted-with-immediate-effect">https://ewn.co.za/2020/08/04/the-da-wants-alcohol-tobacco-ban-lifted-with-immediate-effect</a>                                       |
| 163 | 2020-07-30 | Eye Witness News | Jarita Kassen                  | Seasonal farm worker jobs expected to be worst-hit by COVID-19 pandemic          | <a href="https://ewn.co.za/2020/07/30/seasonal-farm-worker-jobs-expected-to-be-worst-hit-by-covid-19-pandemic">https://ewn.co.za/2020/07/30/seasonal-farm-worker-jobs-expected-to-be-worst-hit-by-covid-19-pandemic</a>                   |

|     |            |                  |                   |                                                                                  |                                                                                                                                                                                                                                       |
|-----|------------|------------------|-------------------|----------------------------------------------------------------------------------|---------------------------------------------------------------------------------------------------------------------------------------------------------------------------------------------------------------------------------------|
| 164 | 2020-07-29 | Eye Witness News | Jarita Kassen     | Agriculture sector has weathered COVID-19 storm, says chief economist            | <a href="https://ewn.co.za/2020/07/29/agriculture-sector-has-weathered-covid-19-storm-says-chief-economist">https://ewn.co.za/2020/07/29/agriculture-sector-has-weathered-covid-19-storm-says-chief-economist</a>                     |
| 165 | 2020-07-25 | Eye Witness News | Ayanda Nyathi     | Tobacco sales ban: Fita to petition SCA as early as next week                    | <a href="https://ewn.co.za/2020/07/25/tobacco-sales-ban-fita-to-petition-sca-as-early-as-next-week">https://ewn.co.za/2020/07/25/tobacco-sales-ban-fita-to-petition-sca-as-early-as-next-week</a>                                     |
| 166 | 2020-07-24 | Eye Witness News | Ayanda Nyathi     | Fita: We're confident that SCA will overturn tobacco sales ban                   | <a href="https://ewn.co.za/2020/07/24/fita-we-re-confident-the-sca-will-overturn-tobacco-sales-ban">https://ewn.co.za/2020/07/24/fita-we-re-confident-the-sca-will-overturn-tobacco-sales-ban</a>                                     |
| 167 | 2020-07-23 | Eye Witness News | Regan Thaw        | SA tobacco market completely taken over by illicit suppliers - Batsa             | <a href="https://ewn.co.za/2020/07/23/sa-tobacco-market-completely-taken-over-by-illicit-suppliers-batsa">https://ewn.co.za/2020/07/23/sa-tobacco-market-completely-taken-over-by-illicit-suppliers-batsa</a>                         |
| 168 | 2020-07-22 | Eye Witness News | Reuters Editorial | SA's retail sales plunge in April and May after hard lockdown                    | <a href="https://ewn.co.za/2020/07/22/sa-s-retail-sales-plunge-in-april-and-may-after-hard-lockdown">https://ewn.co.za/2020/07/22/sa-s-retail-sales-plunge-in-april-and-may-after-hard-lockdown</a>                                   |
| 169 | 2020-07-22 | Eye Witness News | Lungelo Matangira | Govt backtracks on 'incorrect' tweet on booze & cigarette bans during lockdown   | <a href="https://ewn.co.za/2020/07/22/govt-backtracks-on-incorrect-tweet-on-booze-and-cigarette-bans-during-lockdown">https://ewn.co.za/2020/07/22/govt-backtracks-on-incorrect-tweet-on-booze-and-cigarette-bans-during-lockdown</a> |
| 170 | 2020-07-22 | Eye Witness News | Lungelo Matangira | Booze & cigarette bans to stay throughout lockdown - government                  | <a href="https://ewn.co.za/2020/07/22/update-government-clarifies-tweet-on-booze-and-cigarette-bans-during-lockdown">https://ewn.co.za/2020/07/22/update-government-clarifies-tweet-on-booze-and-cigarette-bans-during-lockdown</a>   |
| 171 | 2020-07-22 | Eye Witness News | Kaylynn Palm      | Sharing of cigarettes jumped 430% during lockdown, study finds                   | <a href="https://ewn.co.za/2020/07/22/sharing-of-cigarettes-jumped-430-during-lockdown-study-finds">https://ewn.co.za/2020/07/22/sharing-of-cigarettes-jumped-430-during-lockdown-study-finds</a>                                     |
| 172 | 2020-07-21 | Eye Witness News | Lungelo Matangira | Study: Smokers try to quit as illegal cigarette prices surge 250% under lockdown | <a href="https://ewn.co.za/2020/07/21/study-smokers-try-to-quit-as-illegal-cigarette-prices-up-by-250-under-lockdown">https://ewn.co.za/2020/07/21/study-smokers-try-to-quit-as-illegal-cigarette-prices-up-by-250-under-lockdown</a> |
| 173 | 2020-07-18 | Eye Witness News | Shamiela Fisher   | EC man's suspicious behaviour got him caught with liquid tobacco worth R360k     | <a href="https://ewn.co.za/2020/07/18/ec-man-s-suspicious-behaviour-got-him-caught-with-liquid-tobacco-worth-r360k">https://ewn.co.za/2020/07/18/ec-man-s-suspicious-behaviour-got-him-caught-with-liquid-tobacco-worth-r360k</a>     |

|     |            |                  |                  |                                                                                  |                                                                                                                                                                                                                                         |
|-----|------------|------------------|------------------|----------------------------------------------------------------------------------|-----------------------------------------------------------------------------------------------------------------------------------------------------------------------------------------------------------------------------------------|
| 174 | 2020-07-17 | Eye Witness News | Staff Reporter   | Kabega Park police, in EC, discover liquid tobacco worth around R360k            | <a href="https://ewn.co.za/2020/07/17/kabega-park-police-in-ec-discover-liquid-tobacco-worth-around-r360k">https://ewn.co.za/2020/07/17/kabega-park-police-in-ec-discover-liquid-tobacco-worth-around-r360k</a>                         |
| 175 | 2020-07-16 | Eye Witness News | Theto Mahlakoana | Fita accused to challenging cigarette ban to protect monetary gains              | <a href="https://ewn.co.za/2020/07/16/fita-accused-to-challenging-cigarette-ban-to-protect-monetary-gains">https://ewn.co.za/2020/07/16/fita-accused-to-challenging-cigarette-ban-to-protect-monetary-gains</a>                         |
| 176 | 2020-07-15 | Eye Witness News | Theto Mahlakoana | Fita: We believe Supreme Court of Appeal will rule in favour of tobacco sale bid | <a href="https://ewn.co.za/2020/07/15/fita-believes-supreme-court-of-appeal-will-rule-in-its-fire-in-tobacco-sale-bid">https://ewn.co.za/2020/07/15/fita-believes-supreme-court-of-appeal-will-rule-in-its-fire-in-tobacco-sale-bid</a> |
| 177 | 2020-07-15 | Eye Witness News | Theto Mahlakoana | Lawyer: Dlamini-Zuma looked at economic, psychological impact of tobacco ban     | <a href="https://ewn.co.za/2020/07/15/lawyer-dlamini-zuma-looked-at-economic-psychological-impact-of-tobacco-ban">https://ewn.co.za/2020/07/15/lawyer-dlamini-zuma-looked-at-economic-psychological-impact-of-tobacco-ban</a>           |
| 178 | 2020-07-15 | Eye Witness News | Shimoney Regter  | Expect more roadblocks and patrols, warns Cele                                   | <a href="https://ewn.co.za/2020/07/15/expect-more-roadblocks-and-patrols-warns-cele">https://ewn.co.za/2020/07/15/expect-more-roadblocks-and-patrols-warns-cele</a>                                                                     |
| 179 | 2020-07-15 | Eye Witness News | Theto Mahlakoana | Fita back in court to appeal dismissal of tobacco case against govt              | <a href="https://ewn.co.za/2020/07/15/fita-back-in-court-to-appeal-dismissal-of-tobacco-case-against-govt">https://ewn.co.za/2020/07/15/fita-back-in-court-to-appeal-dismissal-of-tobacco-case-against-govt</a>                         |
| 180 | 2020-07-10 | Eye Witness News | Bonga Dlulane    | Fita confident tobacco ban will go up in smoke after appeal bid approved         | <a href="https://ewn.co.za/2020/07/10/fita-confident-tobacco-ban-will-go-up-in-smoke-after-appeal-bid-approved">https://ewn.co.za/2020/07/10/fita-confident-tobacco-ban-will-go-up-in-smoke-after-appeal-bid-approved</a>               |
| 181 | 2020-07-09 | Eye Witness News | Bonga Dlulane    | High Court grants Fita permission to appeal tobacco sales ban                    | <a href="https://ewn.co.za/2020/07/09/high-court-grants-fita-permission-to-appeal-tobacco-sales-ban">https://ewn.co.za/2020/07/09/high-court-grants-fita-permission-to-appeal-tobacco-sales-ban</a>                                     |
| 182 | 2020-07-06 | Eye Witness News | Ray White        | Stricter lockdown rules not on cards for Gauteng - provincial govt               | <a href="https://ewn.co.za/2020/07/06/stricter-lockdown-rules-not-on-cards-for-gauteng-provincial-govt">https://ewn.co.za/2020/07/06/stricter-lockdown-rules-not-on-cards-for-gauteng-provincial-govt</a>                               |
| 183 | 2020-07-04 | Eye Witness News | Ayanda Nyathi    | Fita: Cigarette ban enriching criminals as illicit trade booms                   | <a href="https://ewn.co.za/2020/07/04/fita-cigarette-ban-enriching-criminals-as-illicit-trade-booms">https://ewn.co.za/2020/07/04/fita-cigarette-ban-enriching-criminals-as-illicit-trade-booms</a>                                     |

|     |            |                  |                     |                                                                                  |                                                                                                                                                                                                                                                     |
|-----|------------|------------------|---------------------|----------------------------------------------------------------------------------|-----------------------------------------------------------------------------------------------------------------------------------------------------------------------------------------------------------------------------------------------------|
| 184 | 2020-07-03 | Eye Witness News | Ayanda Nyathi       | Here's why Fita's appealing court decision on tobacco sales ban                  | <a href="https://ewn.co.za/2020/07/03/here-s-why-fita-s-appealing-court-decision-on-tobacco-sales-ban">https://ewn.co.za/2020/07/03/here-s-why-fita-s-appealing-court-decision-on-tobacco-sales-ban</a>                                             |
| 185 | 2020-07-03 | Eye Witness News | Mia Lindeque        | Cop found with illicit cigarettes out on bail                                    | <a href="https://ewn.co.za/2020/07/03/cop-found-with-illicit-cigarettes-out-on-bail">https://ewn.co.za/2020/07/03/cop-found-with-illicit-cigarettes-out-on-bail</a>                                                                                 |
| 186 | 2020-07-02 | Eye Witness News | Jarita Kassen       | Illicit tobacco trade 'booming since Sars disbanded its probing capacity'        | <a href="https://ewn.co.za/2020/07/02/illicit-tobacco-trade-booming-since-sars-disbanded-its-probing-capacity-expert">https://ewn.co.za/2020/07/02/illicit-tobacco-trade-booming-since-sars-disbanded-its-probing-capacity-expert</a>               |
| 187 | 2020-07-01 | Eye Witness News | Jarita Kassen       | Tobacco firms complicit in illicit cigarette trade, claims expert                | <a href="https://ewn.co.za/2020/07/01/tobacco-firms-complicit-in-illicit-cigarette-trade-claims-expert">https://ewn.co.za/2020/07/01/tobacco-firms-complicit-in-illicit-cigarette-trade-claims-expert</a>                                           |
| 188 | 2020-06-28 | Eye Witness News | Bonga Dlulane       | Fita's legal battle with govt over cigarette sale ban may be far from over       | <a href="https://ewn.co.za/2020/06/28/fita-s-legal-battle-with-govt-over-cigarette-sale-ban-may-be-far-from-over">https://ewn.co.za/2020/06/28/fita-s-legal-battle-with-govt-over-cigarette-sale-ban-may-be-far-from-over</a>                       |
| 189 | 2020-06-27 | Eye Witness News | Bonga Dlulane       | Government feels vindicated by court ruling keeping cigarette ban in place       | <a href="https://ewn.co.za/2020/06/27/government-feels-vindicated-by-court-ruling-keeping-cigarette-ban-in-place">https://ewn.co.za/2020/06/27/government-feels-vindicated-by-court-ruling-keeping-cigarette-ban-in-place</a>                       |
| 190 | 2020-06-27 | Eye Witness News | Veronica Mokhoali   | Govt concerned by Batsa claim that it delayed court hearing on tobacco sales ban | <a href="https://ewn.co.za/2020/06/27/govt-concerned-by-batsa-accusation-that-it-delayed-court-hearing-on-tobacco-sales-ban">https://ewn.co.za/2020/06/27/govt-concerned-by-batsa-accusation-that-it-delayed-court-hearing-on-tobacco-sales-ban</a> |
| 191 | 2020-06-27 | Eye Witness News | Theto Mahlakoana    | Govt acted within its powers to ban sale of tobacco products - court             | <a href="https://ewn.co.za/2020/06/27/govt-acted-within-its-powers-to-ban-sale-of-tobacco-products-court">https://ewn.co.za/2020/06/27/govt-acted-within-its-powers-to-ban-sale-of-tobacco-products-court</a>                                       |
| 192 | 2020-06-26 | Eye Witness News | Theto Mahlakoana    | Up in smoke: Fita fails in court bid to reinstate sale of cigarettes             | <a href="https://ewn.co.za/2020/06/26/up-in-smoke-fita-fails-in-court-bid-to-reinstate-sale-of-cigarettes">https://ewn.co.za/2020/06/26/up-in-smoke-fita-fails-in-court-bid-to-reinstate-sale-of-cigarettes</a>                                     |
| 193 | 2020-06-26 | Eye Witness News | Haji Mohamed Dawjee | HAJI MOHAMED DAWJEE: Cut the cigarette ban already                               | <a href="https://ewn.co.za/2020/06/26/haji-mohamed-dawjee-cut-the-cigarette-ban-already">https://ewn.co.za/2020/06/26/haji-mohamed-dawjee-cut-the-cigarette-ban-already</a>                                                                         |



|     |            |                  |                   |                                                                                  |                                                                                                                                                                                                                                                 |
|-----|------------|------------------|-------------------|----------------------------------------------------------------------------------|-------------------------------------------------------------------------------------------------------------------------------------------------------------------------------------------------------------------------------------------------|
| 194 | 2020-06-14 | Eye Witness News | Kaylynn Palm      | 'When people zol' Smokers pushing for tobacco sale say they've turned to zolling | <a href="https://ewn.co.za/2020/06/14/when-people-zol-capetonians-pushing-for-tobacco-sales-say-they-ve-turned-to-zolling">https://ewn.co.za/2020/06/14/when-people-zol-capetonians-pushing-for-tobacco-sales-say-they-ve-turned-to-zolling</a> |
| 195 | 2020-06-13 | Eye Witness News | Kaylynn Palm      | CT smokers reiterate call for govt to lift ban on tobacco products               | <a href="https://ewn.co.za/2020/06/13/ct-smokers-reiterate-call-for-govt-to-lift-ban-on-tobacco-products">https://ewn.co.za/2020/06/13/ct-smokers-reiterate-call-for-govt-to-lift-ban-on-tobacco-products</a>                                   |
| 196 | 2020-06-12 | Eye Witness News | Judith February   | JUDITH FEBRUARY: We can't afford to take our foot off the pedal with COVID-19    | <a href="https://ewn.co.za/2020/06/12/judith-february-we-can-t-afford-to-take-our-foot-off-the-pedal-in-covid-19-fight">https://ewn.co.za/2020/06/12/judith-february-we-can-t-afford-to-take-our-foot-off-the-pedal-in-covid-19-fight</a>       |
| 197 | 2020-06-11 | Eye Witness News | Theto Mahlakoana  | Govt pleads with court to refer cigarette sale ban matter back to Dlamini-Zuma   | <a href="https://ewn.co.za/2020/06/11/govt-pleads-with-court-to-refer-cigarette-ban-sale-matter-back-to-dlamini-zuma">https://ewn.co.za/2020/06/11/govt-pleads-with-court-to-refer-cigarette-ban-sale-matter-back-to-dlamini-zuma</a>           |
| 198 | 2020-06-10 | Eye Witness News | Theto Mahlakoana  | Govt: Tobacco ban may have eased burden on health system                         | <a href="https://ewn.co.za/2020/06/10/govt-tobacco-ban-may-have-eased-burden-on-health-system">https://ewn.co.za/2020/06/10/govt-tobacco-ban-may-have-eased-burden-on-health-system</a>                                                         |
| 199 | 2020-06-10 | Eye Witness News | Staff Reporter    | Govt decision to ban sale of cigarettes irrational, Fita tells court             | <a href="https://ewn.co.za/2020/06/10/govt-decision-to-ban-sale-of-cigarettes-irrational-fita-tells-court">https://ewn.co.za/2020/06/10/govt-decision-to-ban-sale-of-cigarettes-irrational-fita-tells-court</a>                                 |
| 200 | 2020-06-10 | Eye Witness News | Mia Lindeque      | Cele 'concerned' with spike in murder rate under level 3 lockdown                | <a href="https://ewn.co.za/2020/06/10/cele-concerned-with-spike-in-murder-rate-under-level-3-lockdown">https://ewn.co.za/2020/06/10/cele-concerned-with-spike-in-murder-rate-under-level-3-lockdown</a>                                         |
| 201 | 2020-06-09 | Eye Witness News | Lawrence Hamilton | ANALYSIS: What sets good and bad leaders apart in coronavirus era                | <a href="https://ewn.co.za/2020/06/09/analysis-what-sets-good-and-bad-leaders-apart-in-coronavirus-era">https://ewn.co.za/2020/06/09/analysis-what-sets-good-and-bad-leaders-apart-in-coronavirus-era</a>                                       |
| 202 | 2020-06-09 | Eye Witness News | Theto Mahlakoana  | Pretoria High Court to hear Fita's bid against ban on cigarette sales            | <a href="https://ewn.co.za/2020/06/09/pretoria-high-court-to-hear-fita-s-bid-against-ban-on-cigarette-sales">https://ewn.co.za/2020/06/09/pretoria-high-court-to-hear-fita-s-bid-against-ban-on-cigarette-sales</a>                             |
| 203 | 2020-06-05 | Eye Witness News | Nthakoana Ngatane | ANCWL defends Dlamini-Zuma on tobacco decision, wants alcohol ban back           | <a href="https://ewn.co.za/2020/06/05/ancwl-defends-dlamini-zuma-on-tobacco-decision-wants-alcohol-ban-back">https://ewn.co.za/2020/06/05/ancwl-defends-dlamini-zuma-on-tobacco-decision-wants-alcohol-ban-back</a>                             |

|     |            |                  |                                       |                                                                                  |                                                                                                                                                                                                                                     |
|-----|------------|------------------|---------------------------------------|----------------------------------------------------------------------------------|-------------------------------------------------------------------------------------------------------------------------------------------------------------------------------------------------------------------------------------|
| 204 | 2020-06-03 | Eye Witness News | Kaylynn Palm                          | The burning issue: Smokers call for ban on tobacco sales to be lifted            | <a href="https://ewn.co.za/2020/06/03/smokers-call-for-ban-on-tobacco-sales-to-be-lifted">https://ewn.co.za/2020/06/03/smokers-call-for-ban-on-tobacco-sales-to-be-lifted</a>                                                       |
| 205 | 2020-06-02 | Eye Witness News | Bonga Dlulane                         | DA wants Ramaphosa to discipline Dlamini-Zuma over cigarette sales ban           | <a href="https://ewn.co.za/2020/06/02/da-wants-ramaphosa-to-discipline-dlamini-zuma-over-cigarette-sales-ban">https://ewn.co.za/2020/06/02/da-wants-ramaphosa-to-discipline-dlamini-zuma-over-cigarette-sales-ban</a>               |
| 206 | 2020-06-02 | Eye Witness News | Kaylynn Palm                          | Fired up: Smokers take protest against cigarette sales ban to Parliament         | <a href="https://ewn.co.za/2020/06/02/fired-up-smokers-take-protest-against-cigarette-sales-ban-to-parliament">https://ewn.co.za/2020/06/02/fired-up-smokers-take-protest-against-cigarette-sales-ban-to-parliament</a>             |
| 207 | 2020-05-29 | Eye Witness News | Staff Reporter                        | South Africans quench thirst with moonshine during lockdown ban                  | <a href="https://ewn.co.za/2020/05/29/south-africans-quench-thirst-with-moonshine-during-lockdown-ban">https://ewn.co.za/2020/05/29/south-africans-quench-thirst-with-moonshine-during-lockdown-ban</a>                             |
| 208 | 2020-05-29 | Eye Witness News | Staff Reporter                        | It's lit now! British American Tobacco heads to court over cigarette sale ban    | <a href="https://ewn.co.za/2020/05/29/it-s-lit-now-british-american-tobacco-heads-to-court-over-cigarette-sale-ban">https://ewn.co.za/2020/05/29/it-s-lit-now-british-american-tobacco-heads-to-court-over-cigarette-sale-ban</a>   |
| 209 | 2020-05-28 | Eye Witness News | Clement Manyathela & Theto Mahlakoana | Mthembu: Cigarettes sales will be allowed under level 2                          | <a href="https://ewn.co.za/2020/05/28/mthembu-cigarettes-sales-will-be-allowed-under-level-2">https://ewn.co.za/2020/05/28/mthembu-cigarettes-sales-will-be-allowed-under-level-2</a>                                               |
| 210 | 2020-05-28 | Eye Witness News | Kaylynn Palm                          | With alcohol sales allowed from 1 June, experts warn of surge in trauma cases    | <a href="https://ewn.co.za/2020/05/28/with-alcohol-sales-allowed-from-monday-experts-warn-of-surge-in-trauma-cases">https://ewn.co.za/2020/05/28/with-alcohol-sales-allowed-from-monday-experts-warn-of-surge-in-trauma-cases</a>   |
| 211 | 2020-05-28 | Eye Witness News | Theto Mahlakoana                      | Ban on tobacco sales: Inside the govt's court papers                             | <a href="https://ewn.co.za/2020/05/28/ban-on-tobacco-sales-inside-the-govt-s-court-papers">https://ewn.co.za/2020/05/28/ban-on-tobacco-sales-inside-the-govt-s-court-papers</a>                                                     |
| 212 | 2020-05-27 | Eye Witness News | Theto Mahlakoana                      | Scientific data, logic used for govt's tobacco sales ban decision - Dlamini-Zuma | <a href="https://ewn.co.za/2020/05/27/scientific-data-logic-used-for-govt-s-tobacco-sales-ban-decision-dlamini-zuma">https://ewn.co.za/2020/05/27/scientific-data-logic-used-for-govt-s-tobacco-sales-ban-decision-dlamini-zuma</a> |
| 213 | 2020-05-26 | Eye Witness News | Theto Mahlakoana                      | BTFA: Govt consultations on cigarette sale ban a smokescreen                     | <a href="https://ewn.co.za/2020/05/26/btfa-govt-consultations-on-cigarette-sale-ban-a-smokescreen">https://ewn.co.za/2020/05/26/btfa-govt-consultations-on-cigarette-sale-ban-a-smokescreen</a>                                     |

|     |            |                  |                   |                                                                                  |                                                                                                                                                                                                                                         |
|-----|------------|------------------|-------------------|----------------------------------------------------------------------------------|-----------------------------------------------------------------------------------------------------------------------------------------------------------------------------------------------------------------------------------------|
| 214 | 2020-05-26 | Eye Witness News | Bonga Dlulane     | Steenhuisen: Reopening of economy about six weeks too late                       | <a href="https://ewn.co.za/2020/05/26/steenhuisen-reopening-of-economy-about-six-weeks-too-late">https://ewn.co.za/2020/05/26/steenhuisen-reopening-of-economy-about-six-weeks-too-late</a>                                             |
| 215 | 2020-05-26 | Eye Witness News | Staff Reporter    | OPINION: On COVID-19, science and the politics of data                           | <a href="https://ewn.co.za/2020/05/26/opinion-on-covid-19-science-and-the-politics-of-data">https://ewn.co.za/2020/05/26/opinion-on-covid-19-science-and-the-politics-of-data</a>                                                       |
| 216 | 2020-05-26 | Eye Witness News | Babalo Ndenze     | Dlamini-Zuma defends cigarette sales ban, says she's not Mazzotti's friend       | <a href="https://ewn.co.za/2020/05/26/dlamini-zuma-defends-cigarette-sales-ban-says-she-s-not-mazzotti-s-friend">https://ewn.co.za/2020/05/26/dlamini-zuma-defends-cigarette-sales-ban-says-she-s-not-mazzotti-s-friend</a>             |
| 217 | 2020-05-24 | Eye Witness News | Sifiso Zulu       | ANC 'dismayed' by attacks, defends Dlamini-Zuma in alcohol & tobacco sale debate | <a href="https://ewn.co.za/2020/05/24/anc-dismayed-by-attacks-defends-dlamini-zuma-in-alcohol-and-tobacco-sale-debate">https://ewn.co.za/2020/05/24/anc-dismayed-by-attacks-defends-dlamini-zuma-in-alcohol-and-tobacco-sale-debate</a> |
| 218 | 2020-05-22 | Eye Witness News | Lungelo Matangira | Tweeps see red over report Dlamini-Zuma wants booze, tobacco sold at level 1     | <a href="https://ewn.co.za/2020/05/22/tweeps-see-red-over-report-dlamini-zuma-wants-booze-tobacco-sold-at-level-1">https://ewn.co.za/2020/05/22/tweeps-see-red-over-report-dlamini-zuma-wants-booze-tobacco-sold-at-level-1</a>         |
| 219 | 2020-05-22 | Eye Witness News | Staff Reporter    | 230,000 charged for lockdown breaches, big drop in contact crimes, says Cele     | <a href="https://ewn.co.za/2020/05/22/230-000-charged-for-lockdown-breaches-big-drop-in-contact-crimes-says-cele">https://ewn.co.za/2020/05/22/230-000-charged-for-lockdown-breaches-big-drop-in-contact-crimes-says-cele</a>           |
| 220 | 2020-05-22 | Eye Witness News | Judith February   | JUDITH FEBRUARY: Mr President, the buck has to stop somewhere                    | <a href="https://ewn.co.za/2020/05/22/judith-february-mr-president-the-buck-has-to-stop-somewhere">https://ewn.co.za/2020/05/22/judith-february-mr-president-the-buck-has-to-stop-somewhere</a>                                         |
| 221 | 2020-05-19 | Eye Witness News | Adrian Bauman     | RESEARCH CHECK: Does nicotine protect us against coronavirus?                    | <a href="https://ewn.co.za/2020/05/19/research-check-does-nicotine-protect-us-against-coronavirus">https://ewn.co.za/2020/05/19/research-check-does-nicotine-protect-us-against-coronavirus</a>                                         |
| 222 | 2020-05-16 | Eye Witness News | Kaylynn Palm      | Nearly 90% of SA smokers still getting cigarettes in lockdown – UCT survey       | <a href="https://ewn.co.za/2020/05/16/nearly-90-of-sa-smokers-still-getting-cigarettes-in-lockdown-uct-survey">https://ewn.co.za/2020/05/16/nearly-90-of-sa-smokers-still-getting-cigarettes-in-lockdown-uct-survey</a>                 |
| 223 | 2020-05-15 | Eye Witness News | Kaylynn Palm      | It's lighters up as cigarette black market thrives under lockdown                | <a href="https://ewn.co.za/2020/05/15/it-s-lighters-up-as-cigarette-black-market-thrives-under-lockdown">https://ewn.co.za/2020/05/15/it-s-lighters-up-as-cigarette-black-market-thrives-under-lockdown</a>                             |

|     |            |                  |                  |                                                                                        |                                                                                                                                                                                                                                                                                                                             |
|-----|------------|------------------|------------------|----------------------------------------------------------------------------------------|-----------------------------------------------------------------------------------------------------------------------------------------------------------------------------------------------------------------------------------------------------------------------------------------------------------------------------|
| 224 | 2020-05-13 | Eye Witness News | Shamiela Fisher  | WC police nab more suspects for cigarette smuggling                                    | <a href="https://ewn.co.za/2020/05/13/wc-police-nab-more-suspects-for-cigarette-smuggling">https://ewn.co.za/2020/05/13/wc-police-nab-more-suspects-for-cigarette-smuggling</a>                                                                                                                                             |
| 225 | 2020-05-12 | Eye Witness News | Theto Mahlakoana | Dlamini-Zuma ready to defend govt's decision on cigarette sales ban                    | <a href="https://ewn.co.za/2020/05/12/dlamini-zuma-ready-to-defend-govt-s-decision-on-cigarette-sales-ban">https://ewn.co.za/2020/05/12/dlamini-zuma-ready-to-defend-govt-s-decision-on-cigarette-sales-ban</a>                                                                                                             |
| 226 | 2020-05-12 | Eye Witness News | Mia Lindeque     | Govt to provide reasons for maintaining cigarette sales ban                            | <a href="https://ewn.co.za/2020/05/12/govt-to-provide-reasons-for-maintaining-cigarette-sales-ban">https://ewn.co.za/2020/05/12/govt-to-provide-reasons-for-maintaining-cigarette-sales-ban</a>                                                                                                                             |
| 227 | 2020-05-07 | Eye Witness News | Shamiela Fisher  | Cigarette ban, court dates behind riot at EC's St Albans Prison                        | <a href="https://ewn.co.za/2020/05/07/cigarette-ban-court-dates-behind-riot-at-ec-s-st-albans-prison">https://ewn.co.za/2020/05/07/cigarette-ban-court-dates-behind-riot-at-ec-s-st-albans-prison</a>                                                                                                                       |
| 228 | 2020-05-06 | Eye Witness News | Keegan Leech     | FACT CHECK: Can alcohol ban help South Africans fight COVID-19 infection?              | <a href="https://ewn.co.za/2020/05/06/fact-check-can-alcohol-ban-help-south-africans-fight-covid-19-infection">https://ewn.co.za/2020/05/06/fact-check-can-alcohol-ban-help-south-africans-fight-covid-19-infection</a>                                                                                                     |
| 229 | 2020-05-06 | Eye Witness News | Staff Reporter   | BATSA decides against legal action over cigarette sale ban                             | <a href="https://ewn.co.za/2020/05/06/batsa-decides-against-legal-action-over-cigarette-sale-ban">https://ewn.co.za/2020/05/06/batsa-decides-against-legal-action-over-cigarette-sale-ban</a>                                                                                                                               |
| 230 | 2020-06-21 | Fin24            | Murray Williams  | Govt lawyers in sudden about-turn, get court to delay cigarette case until August      | <a href="https://www.news24.com/fin24/companies/agribusiness/breaking-govt-lawyers-in-sudden-about-turn-get-court-to-delay-cigarette-case-until-august-20200626">https://www.news24.com/fin24/companies/agribusiness/breaking-govt-lawyers-in-sudden-about-turn-get-court-to-delay-cigarette-case-until-august-20200626</a> |
| 231 | 2020-06-20 | Fin24            | Murray Williams  | Illegal cigarette trade may reduce economic harm of tobacco ban - govt in court papers | <a href="https://www.news24.com/fin24/economy/illegal-cigarette-trade-may-reduce-economic-harm-of-tobacco-ban-govt-in-court-papers-20200620">https://www.news24.com/fin24/economy/illegal-cigarette-trade-may-reduce-economic-harm-of-tobacco-ban-govt-in-court-papers-20200620</a>                                         |
| 232 | 2020-06-10 | Fin24            | Jan Cronje       | Cigarette ban is both legal and supported by science, State argues in court            | <a href="https://www.news24.com/fin24/economy/south-africa/cigarette-ban-is-both-legal-and-supported-by-science-state-argues-in-court-20200610">https://www.news24.com/fin24/economy/south-africa/cigarette-ban-is-both-legal-and-supported-by-science-state-argues-in-court-20200610</a>                                   |

|     |            |       |                        |                                                                                       |                                                                                                                                                                                                                                                                                                                 |
|-----|------------|-------|------------------------|---------------------------------------------------------------------------------------|-----------------------------------------------------------------------------------------------------------------------------------------------------------------------------------------------------------------------------------------------------------------------------------------------------------------|
| 233 | 2020-06-08 | Fin24 | Jan Cronje             | Tobacco group to argue Dlamini-Zuma overstepped powers in banning sales of cigarettes | <a href="https://www.news24.com/fin24/economy/tobacco-group-to-argue-dlamini-zuma-overstepped-powers-in-banning-cigarettes-20200608">https://www.news24.com/fin24/economy/tobacco-group-to-argue-dlamini-zuma-overstepped-powers-in-banning-cigarettes-20200608</a>                                             |
| 234 | 2020-06-04 | Fin24 | Jan Cronje             | Govt says lost tax revenue from smoking ban 'outweighed' by harm cigarettes cause     | <a href="https://www.news24.com/fin24/economy/south-africa/govt-says-lost-tax-revenue-from-smoking-ban-outweighed-by-harm-cigarettes-cause-20200604">https://www.news24.com/fin24/economy/south-africa/govt-says-lost-tax-revenue-from-smoking-ban-outweighed-by-harm-cigarettes-cause-20200604</a>             |
| 235 | 2020-05-16 | Fin24 | Marelise van der Merwe | Cigarette ban is 'failing', can create lasting illicit market - study                 | <a href="https://www.news24.com/fin24/Economy/South-Africa/cigarette-ban-is-failing-can-create-lasting-illicit-market-study-20200516">https://www.news24.com/fin24/Economy/South-Africa/cigarette-ban-is-failing-can-create-lasting-illicit-market-study-20200516</a>                                           |
| 236 | 2020-05-04 | Fin24 | Lameez Omarjee         | Ban on cigarette, liquor sales costing R1.5bn in lost tax revenue – Kieswetter        | <a href="https://www.news24.com/fin24/economy/south-africa/ban-on-cigarette-and-liquor-sales-costing-r15-billion-in-lost-tax-revenue-kieswetter-20200430">https://www.news24.com/fin24/economy/south-africa/ban-on-cigarette-and-liquor-sales-costing-r15-billion-in-lost-tax-revenue-kieswetter-20200430</a>   |
| 237 | 2020-04-29 | Fin24 | Lameez Omarjee         | Lockdown   Cigarettes, liquor still won't be for sale on Level 4                      | <a href="https://www.news24.com/fin24/Economy/South-Africa/lockdown-cigarettes-liquor-still-wont-be-for-sale-on-level-4-20200429">https://www.news24.com/fin24/Economy/South-Africa/lockdown-cigarettes-liquor-still-wont-be-for-sale-on-level-4-20200429</a>                                                   |
| 238 | 2020-04-26 | Fin24 | Nicole McCain          | Lockdown: Smokers still able to get cigarettes, informal trade is active - survey     | <a href="https://www.news24.com/news24/southafrica/news/lockdown-smokers-still-able-to-get-cigarettes-informal-trade-is-active-survey-20200426">https://www.news24.com/news24/southafrica/news/lockdown-smokers-still-able-to-get-cigarettes-informal-trade-is-active-survey-20200426</a>                       |
| 239 | 2020-04-18 | Fin24 | Nicole McCain          | Lockdown: Tobacco association to challenge cigarette ban in court                     | <a href="https://www.news24.com/news24/southafrica/news/lockdown-tobacco-association-to-challenge-cigarette-ban-in-court-20200418">https://www.news24.com/news24/southafrica/news/lockdown-tobacco-association-to-challenge-cigarette-ban-in-court-20200418</a>                                                 |
| 240 | 2020-04-04 | Fin24 | Carin Smith            | Cigarette ban could force 11 million smokers to seek illicit traders, industry warns  | <a href="https://www.news24.com/fin24/companies/agribusiness/cigarette-ban-could-force-11-million-smokers-to-seek-illicit-traders-industry-warns-20200404">https://www.news24.com/fin24/companies/agribusiness/cigarette-ban-could-force-11-million-smokers-to-seek-illicit-traders-industry-warns-20200404</a> |

|     |            |       |                |                                                                                               |                                                                                                                                                                                                                                                                                                                   |
|-----|------------|-------|----------------|-----------------------------------------------------------------------------------------------|-------------------------------------------------------------------------------------------------------------------------------------------------------------------------------------------------------------------------------------------------------------------------------------------------------------------|
| 241 | 2020-06-10 | Fin24 | Ernest Mabuza  | Judgment reserved: the battle of wills in court over tobacco ban                              | <a href="https://www.sowetanlive.co.za/news/south-africa/2020-06-10-judgment-reserved-the-battle-of-wills-in-court-over-tobacco-ban/">https://www.sowetanlive.co.za/news/south-africa/2020-06-10-judgment-reserved-the-battle-of-wills-in-court-over-tobacco-ban/</a>                                             |
| 242 | 2020-05-04 | Fin24 | Lameez Omarjee | If cigarette sales spread coronavirus, prove it – tobacco association                         | <a href="https://www.news24.com/fin24/economy/south-africa/if-cigarette-sales-spread-coronavirus-prove-it-tobacco-association-20200504">https://www.news24.com/fin24/economy/south-africa/if-cigarette-sales-spread-coronavirus-prove-it-tobacco-association-20200504</a>                                         |
| 243 | 2020-05-03 | Fin24 | Jenni Evans    | ANCWL fuming over treatment of Dlamini-Zuma on cigarette about-turn                           | <a href="https://www.news24.com/news24/southafrica/news/ancwl-fuming-over-treatment-of-dlamini-zuma-on-cigarette-about-turn-20200503">https://www.news24.com/news24/southafrica/news/ancwl-fuming-over-treatment-of-dlamini-zuma-on-cigarette-about-turn-20200503</a>                                             |
| 244 | 2020-05-11 | Fin24 | Jan Cronje     | Nothing sinister' behind renewed cigarette ban, says Dlamini-Zuma ahead of court case         | <a href="https://www.news24.com/fin24/economy/nothing-sinister-behind-renewed-cigarette-ban-says-dlamini-zuma-ahead-of-court-case-20200511">https://www.news24.com/fin24/economy/nothing-sinister-behind-renewed-cigarette-ban-says-dlamini-zuma-ahead-of-court-case-20200511</a>                                 |
| 245 | 2020-05-23 | Fin24 | Canny Maphanga | Lockdown: Informal Traders Alliance pleads with NCCC to lift tobacco ban                      | <a href="https://www.news24.com/news24/southafrica/news/lockdown-informal-traders-alliance-pleads-with-nccc-to-lift-tobacco-ban-20200523">https://www.news24.com/news24/southafrica/news/lockdown-informal-traders-alliance-pleads-with-nccc-to-lift-tobacco-ban-20200523</a>                                     |
| 246 | 2020-05-24 | Fin24 | Staff Reporter | Lockdown: Draft regulations propose tobacco ban extension, but lifting ban on liquor - report | <a href="https://www.news24.com/news24/southafrica/news/lockdown-draft-regulations-propose-tobacco-ban-extension-but-lifting-ban-on-liquor-report-20200524">https://www.news24.com/news24/southafrica/news/lockdown-draft-regulations-propose-tobacco-ban-extension-but-lifting-ban-on-liquor-report-20200524</a> |
| 247 | 2020-08-18 | Fin24 | Alex Mitchley  | Smokers stock up out of fear the government will reverse unbanning order                      | <a href="https://www.news24.com/news24/southafrica/news/smokers-stock-up-out-of-fear-the-government-will-reverse-unbanning-order-20200818">https://www.news24.com/news24/southafrica/news/smokers-stock-up-out-of-fear-the-government-will-reverse-unbanning-order-20200818</a>                                   |
| 248 | 2020-08-17 | Fin24 | Mandisa Nyathi | It's official: Level 2's booze, smokes and local travel have been gazetted                    | <a href="https://www.news24.com/citypress/news/its-official-level-2s-booze-smokes-and-local-travel-have-been-gazetted-20200817">https://www.news24.com/citypress/news/its-official-level-2s-booze-smokes-and-local-travel-have-been-gazetted-20200817</a>                                                         |



|     |            |          |                                      |                                                                                                       |                                                                                                                                                                                                                                                                                                                                                                                   |
|-----|------------|----------|--------------------------------------|-------------------------------------------------------------------------------------------------------|-----------------------------------------------------------------------------------------------------------------------------------------------------------------------------------------------------------------------------------------------------------------------------------------------------------------------------------------------------------------------------------|
| 249 | 2020-09-08 | Fin24    | Staff Reporter                       | Coronavirus morning update: Bans created new criminal networks, and global economies take strain      | <a href="https://www.news24.com/health24/medical/infectious-diseases/coronavirus/coronavirus-morning-update-bans-created-new-criminal-networks-and-global-economies-take-strain-20200908-5">https://www.news24.com/health24/medical/infectious-diseases/coronavirus/coronavirus-morning-update-bans-created-new-criminal-networks-and-global-economies-take-strain-20200908-5</a> |
| 250 | 2020-08-15 | Fin24    | Kaveel Singh                         | SA down to Level 2 lockdown, with tobacco, alcohol bans lifted 15 Aug                                 | <a href="https://www.news24.com/news24/southafrica/news/sa-down-to-level-2-lockdown-with-tobacco-alcohol-bans-lifted-20200815">https://www.news24.com/news24/southafrica/news/sa-down-to-level-2-lockdown-with-tobacco-alcohol-bans-lifted-20200815</a>                                                                                                                           |
| 251 | 2020-12-11 | Fin24    | Londiwe Buthelez                     | Tobacco sales ban was unconstitutional and unnecessary, court finds                                   | <a href="https://www.news24.com/fin24/economy/tobacco-ban-was-unconstitutional-and-unnecessary-says-court-20201211">https://www.news24.com/fin24/economy/tobacco-ban-was-unconstitutional-and-unnecessary-says-court-20201211</a>                                                                                                                                                 |
| 252 | 2020-08-05 | Fin24    | Anathi Madubela                      | Ackerman lashes out at 'confusing, contradictory' explanations for tobacco, alcohol sales ban   Fin24 | <a href="https://www.news24.com/fin24/companies/retail/ackerman-lashes-out-at-confusing-contradictory-explanations-for-tobacco-alcohol-sales-ban-20200805">https://www.news24.com/fin24/companies/retail/ackerman-lashes-out-at-confusing-contradictory-explanations-for-tobacco-alcohol-sales-ban-20200805</a>                                                                   |
| 253 | 2020-06-25 | Fin24    | Siphesihle Ndamase                   | Scientist says there are more merits in banning alcohol than tobacco                                  | <a href="https://briefly.co.za/69283-scientist-merits-banning-alcohol-tobacco.html">https://briefly.co.za/69283-scientist-merits-banning-alcohol-tobacco.html</a>                                                                                                                                                                                                                 |
| 254 | 2020-05-07 | Fin24    | Riaan Grobler                        | eNCA morning anchors off air but 'not suspended', following Nkosazana Dlamini-Zuma remarks            | <a href="https://www.news24.com/news24/SouthAfrica/News/enca-morning-anchors-off-air-but-not-suspended-following-nkosazana-dlamini-zuma-remarks-20200507">https://www.news24.com/news24/SouthAfrica/News/enca-morning-anchors-off-air-but-not-suspended-following-nkosazana-dlamini-zuma-remarks-20200507</a>                                                                     |
| 255 | 2020-08-16 | Fin24    | Sibongile Khumalo and Lameez Omarjee | Thanks for reopening the economy, but we need more public investment - Cosatu                         | <a href="https://www.news24.com/fin24/economy/thanks-for-reopening-the-economy-but-we-need-more-public-investment-cosatu-20200816">https://www.news24.com/fin24/economy/thanks-for-reopening-the-economy-but-we-need-more-public-investment-cosatu-20200816</a>                                                                                                                   |
| 256 | 2020-04-30 | Health24 | Jan Gerber                           | Tobacco ban: 'We understood the reasons and we agree,' says parliamentary health committee chair      | <a href="https://www.news24.com/news24/southafrica/news/tobacco-ban-we-understood-the-reasons-and-we-agree-says-parliamentary-health-committee-chair-20200430">https://www.news24.com/news24/southafrica/news/tobacco-ban-we-understood-the-reasons-and-we-agree-says-parliamentary-health-committee-chair-20200430</a>                                                           |
| 257 | 2020-05-01 | Health24 | Jan Gerber                           | President Ramaphosa supports tobacco ban - Jackson Mthembu                                            | <a href="https://www.news24.com/news24/southafrica/news/president-ramaphosa-supports-tobacco-ban-jackson-mthembu-20200501">https://www.news24.com/news24/southafrica/news/president-ramaphosa-supports-tobacco-ban-jackson-mthembu-20200501</a>                                                                                                                                   |

|     |            |                    |                   |                                                                                        |                                                                                                                                                                                                                                                                                       |
|-----|------------|--------------------|-------------------|----------------------------------------------------------------------------------------|---------------------------------------------------------------------------------------------------------------------------------------------------------------------------------------------------------------------------------------------------------------------------------------|
| 258 | 2020-06-18 | Health24           | Jan Gerber        | Covid-19: No information was withheld from public, Ramaphosa tells Parliament   News24 | <a href="https://www.news24.com/news24/southafrica/news/covid-19-no-information-was-withheld-from-public-ramaphosa-tells-parliament-20200618">https://www.news24.com/news24/southafrica/news/covid-19-no-information-was-withheld-from-public-ramaphosa-tells-parliament-20200618</a> |
| 259 | 2020-04-21 | Independent Online | Jonisayi Maromo   | Call to lift ban on cigarettes, non-essential goods as SA waits for Ramaphosa's speech | <a href="https://www.iol.co.za/news/politics/call-to-lift-ban-on-cigarettes-non-essential-goods-as-sa-waits-for-ramaphosas-speech-46993082">https://www.iol.co.za/news/politics/call-to-lift-ban-on-cigarettes-non-essential-goods-as-sa-waits-for-ramaphosas-speech-46993082</a>     |
| 260 | 2020-06-28 | Independent Online | Bongani Hans      | Fight on tobacco ban turns into blame game after judgment                              | <a href="https://www.iol.co.za/news/politics/fight-on-tobacco-ban-turns-into-blame-game-after-judgment-50051139">https://www.iol.co.za/news/politics/fight-on-tobacco-ban-turns-into-blame-game-after-judgment-50051139</a>                                                           |
| 261 | 2020-05-28 | Independent Online | Samkelo Mtshali   | Malema praises Dlamini Zuma for sticking to her guns on tobacco ban                    | <a href="https://www.iol.co.za/news/politics/malema-praises-dlamini-zuma-for-sticking-to-her-guns-on-tobacco-ban-48633902">https://www.iol.co.za/news/politics/malema-praises-dlamini-zuma-for-sticking-to-her-guns-on-tobacco-ban-48633902</a>                                       |
| 262 | 2020-07-01 | Independent Online | Kelly-Jane Turner | Cigarette ban will eventually be lifted, says Ramaphosa                                | <a href="https://www.iol.co.za/news/politics/cigarette-ban-will-eventually-be-lifted-says-ramaphosa-50248393">https://www.iol.co.za/news/politics/cigarette-ban-will-eventually-be-lifted-says-ramaphosa-50248393</a>                                                                 |
| 263 | 2020-05-04 | Independent Online | Sihle Mavuso      | Fire rages over tobacco ban during lockdown                                            | <a href="https://www.iol.co.za/news/politics/fire-rages-over-tobacco-ban-during-lockdown-47555402">https://www.iol.co.za/news/politics/fire-rages-over-tobacco-ban-during-lockdown-47555402</a>                                                                                       |
| 264 | 2020-04-30 | Independent Online | Samkelo Mtshali   | Praise for Dlamini Zuma's stance on continued tobacco ban                              | <a href="https://www.iol.co.za/news/politics/praise-for-dlamini-zumas-stance-on-continued-tobacco-ban-47410646">https://www.iol.co.za/news/politics/praise-for-dlamini-zumas-stance-on-continued-tobacco-ban-47410646</a>                                                             |
| 265 | 2020-05-05 | Independent Online | Marvin Charles    | Ill-considered tobacco ban impacts health, welfare of millions across SA               | <a href="https://www.iol.co.za/capeargus/news/ill-considered-tobacco-ban-impacts-health-welfare-of-millions-across-sa-47558570">https://www.iol.co.za/capeargus/news/ill-considered-tobacco-ban-impacts-health-welfare-of-millions-across-sa-47558570</a>                             |
| 266 | 2020-05-30 | Independent Online | Zelda Venter      | Tobacco sales debate set for court                                                     | <a href="https://www.iol.co.za/pretoria-news/news/tobacco-sales-debate-set-for-court-48712225">https://www.iol.co.za/pretoria-news/news/tobacco-sales-debate-set-for-court-48712225</a>                                                                                               |

|     |            |                    |                     |                                                                                                       |                                                                                                                                                                                                                                                                                                                                     |
|-----|------------|--------------------|---------------------|-------------------------------------------------------------------------------------------------------|-------------------------------------------------------------------------------------------------------------------------------------------------------------------------------------------------------------------------------------------------------------------------------------------------------------------------------------|
| 267 | 2020-07-05 | Independent Online | African News Agency | #TheBanMustFall open letter to President Ramaphosa details devastating impact of tobacco ban          | <a href="https://www.iol.co.za/news/politics/thebanmustfall-open-letter-to-president-ramaphosa-details-devastating-impact-of-tobacco-ban-50460645">https://www.iol.co.za/news/politics/thebanmustfall-open-letter-to-president-ramaphosa-details-devastating-impact-of-tobacco-ban-50460645</a>                                     |
| 268 | 2020-06-11 | Independent Online | Baldwin Ndaba       | Tobacco ban was to save lives in the country, court told                                              | <a href="https://www.iol.co.za/news/politics/tobacco-ban-was-to-save-lives-in-the-country-court-told-49249981">https://www.iol.co.za/news/politics/tobacco-ban-was-to-save-lives-in-the-country-court-told-49249981</a>                                                                                                             |
| 269 | 2020-06-03 | Independent Online | Lyse Comins And ANA | Court to hear challenge to cigarette ban                                                              | <a href="https://www.iol.co.za/mercury/news/court-to-hear-challenge-to-cigarette-ban-48909322">https://www.iol.co.za/mercury/news/court-to-hear-challenge-to-cigarette-ban-48909322</a>                                                                                                                                             |
| 270 | 2020-08-05 | Independent Online | ANA Reporter        | BATSA rubbishes Dlamini Zuma's 'perverse justification' for tobacco ban in court                      | <a href="https://www.iol.co.za/news/south-africa/batsa-rubbishes-dlamini-zumas-perverse-justification-for-tobacco-ban-in-court-2fbad1be-0b60-4ba9-855b-972cc2d1fa47">https://www.iol.co.za/news/south-africa/batsa-rubbishes-dlamini-zumas-perverse-justification-for-tobacco-ban-in-court-2fbad1be-0b60-4ba9-855b-972cc2d1fa47</a> |
| 271 | 2020-05-27 | Independent Online | Staff Reporter      | AfriForum serves lawyer's letter on Dlamini Zuma, threatens legal action if tobacco ban is not lifted | <a href="https://www.iol.co.za/news/south-africa/afriforum-serves-lawyers-letter-on-dlamini-zuma-threatens-legal-action-if-tobacco-ban-is-not-lifted-48586318">https://www.iol.co.za/news/south-africa/afriforum-serves-lawyers-letter-on-dlamini-zuma-threatens-legal-action-if-tobacco-ban-is-not-lifted-48586318</a>             |
| 272 | 2020-07-24 | Independent Online | Helene Eloff        | Tobacco ban is missed opportunity to create smoke-free SA - PMSA                                      | <a href="https://www.iol.co.za/technology/gadgets/tobacco-ban-is-missed-opportunity-to-create-smoke-free-sa-pmsa-1a53be71-aaad-4e2a-8bbe-ef7bef051f61">https://www.iol.co.za/technology/gadgets/tobacco-ban-is-missed-opportunity-to-create-smoke-free-sa-pmsa-1a53be71-aaad-4e2a-8bbe-ef7bef051f61</a>                             |
| 273 | 2020-06-09 | Independent Online | Zintle Mahlati      | High Court to hear Fita case on tobacco ban on Wednesday                                              | <a href="https://www.iol.co.za/news/politics/high-court-to-hear-fita-case-on-tobacco-ban-on-wednesday-49153036">https://www.iol.co.za/news/politics/high-court-to-hear-fita-case-on-tobacco-ban-on-wednesday-49153036</a>                                                                                                           |
| 274 | 2020-07-03 | Independent Online | Zintle Mahlati      | Fita has filed appeal over cigarette sales ban ruling                                                 | <a href="https://www.iol.co.za/news/politics/fita-has-filed-appeal-over-cigarette-sales-ban-ruling-50356392">https://www.iol.co.za/news/politics/fita-has-filed-appeal-over-cigarette-sales-ban-ruling-50356392</a>                                                                                                                 |

|     |            |                    |                                  |                                                                                                 |                                                                                                                                                                                                                                                                                                                                                                                               |
|-----|------------|--------------------|----------------------------------|-------------------------------------------------------------------------------------------------|-----------------------------------------------------------------------------------------------------------------------------------------------------------------------------------------------------------------------------------------------------------------------------------------------------------------------------------------------------------------------------------------------|
| 275 | 2020-06-10 | Independent Online | Sandile Mchunu                   | British American Tobacco puts pressure on share with cut in its revenue expectations            | <a href="https://www.iol.co.za/business-report/companies/british-american-tobacco-puts-pressure-on-share-with-cut-in-its-revenue-expectations-49175982">https://www.iol.co.za/business-report/companies/british-american-tobacco-puts-pressure-on-share-with-cut-in-its-revenue-expectations-49175982</a>                                                                                     |
| 276 | 2020-07-21 | Independent Online | African News Agency              | UCT study stubs out argument for continued cigarette ban                                        | <a href="https://www.iol.co.za/news/politics/uct-study-stubs-out-argument-for-continued-cigarette-ban-c5619f0d-4b73-4c2c-a860-93223b2323e1">https://www.iol.co.za/news/politics/uct-study-stubs-out-argument-for-continued-cigarette-ban-c5619f0d-4b73-4c2c-a860-93223b2323e1</a>                                                                                                             |
| 277 | 2020-07-23 | Independent Online | ANA Reporter                     | Tobacco ban costing South Africa R35m a day in lost taxes - BATSA                               | <a href="https://www.iol.co.za/news/politics/tobacco-ban-costing-south-africa-r35m-a-day-in-lost-taxes-batsa-ff5d9355-1364-4f5e-abb0-18941d98d031">https://www.iol.co.za/news/politics/tobacco-ban-costing-south-africa-r35m-a-day-in-lost-taxes-batsa-ff5d9355-1364-4f5e-abb0-18941d98d031</a>                                                                                               |
| 278 | 2020-09-29 | Independent Online | ANA Reporter                     | FITA terminates Gold Leaf's membership as rumours swirl about illegal sales during tobacco ban  | <a href="https://www.iol.co.za/news/south-africa/western-cape/fita-terminates-gold-leafs-membership-as-rumours-swirl-about-illegal-sales-during-tobacco-ban-ec14a361-f1be-5879-9f4d-98d9f4abead7">https://www.iol.co.za/news/south-africa/western-cape/fita-terminates-gold-leafs-membership-as-rumours-swirl-about-illegal-sales-during-tobacco-ban-ec14a361-f1be-5879-9f4d-98d9f4abead7</a> |
| 279 | 2020-04-07 | Independent Online | Zelda Venter                     | Coronavirus: No booze, smokes or walkies, now a ban on kisses?                                  | <a href="https://www.iol.co.za/pretoria-news/coronavirus-no-booze-smokes-or-walkies-now-a-ban-on-kisses-46426133">https://www.iol.co.za/pretoria-news/coronavirus-no-booze-smokes-or-walkies-now-a-ban-on-kisses-46426133</a>                                                                                                                                                                 |
| 280 | 2020-04-04 | Independent Online | SAPeople Editorial               | Calls for Unbanning of 'Non-Essential' Goods Like Cigarettes in Retail Stores Currently Trading | <a href="https://www.sapeople.com/2020/04/04/calls-for-unbanning-of-non-essential-goods-like-cigarettes-in-retail-stores-currently-trading/">https://www.sapeople.com/2020/04/04/calls-for-unbanning-of-non-essential-goods-like-cigarettes-in-retail-stores-currently-trading/</a>                                                                                                           |
| 281 | 2020-05-28 | Independent online | Bradley Slade                    | Court may struggle to find strong enough link between ban on tobacco and its intended purpose   | <a href="https://www.iol.co.za/news/politics/opinion/court-may-struggle-to-find-strong-enough-link-between-ban-on-tobacco-and-its-intended-purpose-48589915">https://www.iol.co.za/news/politics/opinion/court-may-struggle-to-find-strong-enough-link-between-ban-on-tobacco-and-its-intended-purpose-48589915</a>                                                                           |
| 282 | 2020-05-02 | Independent online | Sameer Naik and Tanya Waterworth | Tobacco big guns on fire over cigarette ban                                                     | <a href="https://www.iol.co.za/ios/news/tobacco-big-guns-on-fire-over-cigarette-ban-47468425">https://www.iol.co.za/ios/news/tobacco-big-guns-on-fire-over-cigarette-ban-47468425</a>                                                                                                                                                                                                         |

|     |            |                    |                                   |                                                                                        |                                                                                                                                                                                                                                                                                     |
|-----|------------|--------------------|-----------------------------------|----------------------------------------------------------------------------------------|-------------------------------------------------------------------------------------------------------------------------------------------------------------------------------------------------------------------------------------------------------------------------------------|
| 283 | 2020-07-07 | Independent Online | Staff Reporter                    | Govt Promises To Consider Input As It Seeks Comment On Lockdown Regulations            | <a href="https://iafrica.com/govt-promises-to-consider-input-as-it-seeks-comment-on-lockdown-regulations/">https://iafrica.com/govt-promises-to-consider-input-as-it-seeks-comment-on-lockdown-regulations/</a>                                                                     |
| 284 | 2020-05-11 | Independent Online | Nomahlubi Jordaan                 | Ban on cigarettes a crucial part of fighting Covid-19: HSRC                            | <a href="https://www.heraldlive.co.za/news/2020-05-11-ban-on-cigarettes-a-crucial-part-of-fighting-covid-19-hsrc/">https://www.heraldlive.co.za/news/2020-05-11-ban-on-cigarettes-a-crucial-part-of-fighting-covid-19-hsrc/</a>                                                     |
| 285 | 2020-05-06 | Independent Online | Naledi Shange                     | British American Tobacco pauses court battle over cigarette ban                        | <a href="https://www.heraldlive.co.za/news/2020-05-06-british-american-tobacco-pauses-court-battle-over-cigarette-ban/">https://www.heraldlive.co.za/news/2020-05-06-british-american-tobacco-pauses-court-battle-over-cigarette-ban/</a>                                           |
| 286 | 2020-05-01 | Independent Online | Thabo Mokone And Naziziphiwo Buso | Mboweni does not support alcohol, cigarette sales ban                                  | <a href="https://www.heraldlive.co.za/weekend-post/your-weekend/2020-05-01-mboweni-does-not-support-alcohol-cigarette-sales-ban/">https://www.heraldlive.co.za/weekend-post/your-weekend/2020-05-01-mboweni-does-not-support-alcohol-cigarette-sales-ban/</a>                       |
| 287 | 2020-04-30 | Independent Online | Thabo Mokone                      | Tito Mboweni reveals he does not support ban on alcohol and cigarette sales            | <a href="https://www.heraldlive.co.za/news/politics/2020-04-30-tito-mboweni-reveals-he-does-not-support-ban-on-alcohol-and-cigarette-sales/">https://www.heraldlive.co.za/news/politics/2020-04-30-tito-mboweni-reveals-he-does-not-support-ban-on-alcohol-and-cigarette-sales/</a> |
| 288 | 2020-04-30 | Independent Online | Nomahlubi Jordaan                 | Tobacco association heads to court to challenge ban on cigarette sales                 | <a href="https://www.heraldlive.co.za/news/2020-04-30-tobacco-association-heads-to-court-to-challenge-ban-on-cigarette-sales/">https://www.heraldlive.co.za/news/2020-04-30-tobacco-association-heads-to-court-to-challenge-ban-on-cigarette-sales/</a>                             |
| 289 | 2020-04-30 | Independent Online | Nomahlubi Jordaan                 | More than 270,000 South Africans sign petition against ban on cigarette sales          | <a href="https://www.heraldlive.co.za/news/2020-04-30-over-270000-south-africans-sign-petition-against-ban-on-cigarette-sales/">https://www.heraldlive.co.za/news/2020-04-30-over-270000-south-africans-sign-petition-against-ban-on-cigarette-sales/</a>                           |
| 290 | 2020-04-24 | Independent Online | Staff Reporter                    | Covid-19   Cigarette industry drops legal challenge as smokes set to return to shelves | <a href="https://www.heraldlive.co.za/news/2020-04-24-covid-19-cigarette-industry-drops-legal-challenge-as-smokes-set-to-return-to-shelves/">https://www.heraldlive.co.za/news/2020-04-24-covid-19-cigarette-industry-drops-legal-challenge-as-smokes-set-to-return-to-shelves/</a> |
| 291 | 2020-04-20 | Independent Online | Cebelihle Bhengu                  | POLL   Should the lockdown ciggie ban be lifted?                                       | <a href="https://www.heraldlive.co.za/news/2020-04-20-poll-should-the-lockdown-ciggie-ban-be-lifted/">https://www.heraldlive.co.za/news/2020-04-20-poll-should-the-lockdown-ciggie-ban-be-lifted/</a>                                                                               |

|     |            |                    |                  |                                                                                 |                                                                                                                                                                                                                                                                                                                                     |
|-----|------------|--------------------|------------------|---------------------------------------------------------------------------------|-------------------------------------------------------------------------------------------------------------------------------------------------------------------------------------------------------------------------------------------------------------------------------------------------------------------------------------|
| 292 | 2020-06-26 | Independent Online | ANA Reporter     | Cigarette industry in shock after double court blow for overturning smoking ban | <a href="https://www.iol.co.za/news/politics/cigarette-industry-in-shock-after-double-court-blow-for-overturning-smoking-ban-49990370">https://www.iol.co.za/news/politics/cigarette-industry-in-shock-after-double-court-blow-for-overturning-smoking-ban-49990370</a>                                                             |
| 293 | 2020-05-30 | Independent Online | Ziyanda Mgandela | Recovering drug addict's smoking plea to president                              | <a href="https://www.iol.co.za/ios/news/recovering-drug-addicts-smoking-plea-to-president-48709080">https://www.iol.co.za/ios/news/recovering-drug-addicts-smoking-plea-to-president-48709080</a>                                                                                                                                   |
| 294 | 2020-08-19 | Independent Online | Staff Reporter   | SA smokers empty shops of cigarettes after ban lifted                           | <a href="https://www.iol.co.za/business-report/companies/sa-smokers-empty-shops-of-cigarettes-after-ban-lifted-6b696acb-187e-4583-9a9e-69f66a8b1e37">https://www.iol.co.za/business-report/companies/sa-smokers-empty-shops-of-cigarettes-after-ban-lifted-6b696acb-187e-4583-9a9e-69f66a8b1e37</a>                                 |
| 295 | 2020-04-29 | Independent Online | Lou-Anne Daniels | Ban on alcohol and cigarette sales remains in place under Level 4 lockdown      | <a href="https://www.iol.co.za/news/politics/ban-on-alcohol-and-cigarette-sales-remains-in-place-under-level-4-lockdown-47362327">https://www.iol.co.za/news/politics/ban-on-alcohol-and-cigarette-sales-remains-in-place-under-level-4-lockdown-47362327</a>                                                                       |
| 296 | 2020-05-04 | Independent Online | Sihle Mavuso     | Ramaphosa backs Dlamini-Zuma in cigarette ban war                               | <a href="https://www.iol.co.za/news/politics/ramaphosa-backs-dlamini-zuma-in-cigarette-ban-war-47507125">https://www.iol.co.za/news/politics/ramaphosa-backs-dlamini-zuma-in-cigarette-ban-war-47507125</a>                                                                                                                         |
| 297 | 2020-05-30 | Independent Online | Staff Reporter   | Tobacco ban battle set for court                                                | <a href="https://www.iol.co.za/ios/news/tobacco-ban-battle-set-for-court-48709054">https://www.iol.co.za/ios/news/tobacco-ban-battle-set-for-court-48709054</a>                                                                                                                                                                     |
| 298 | 2020-10-29 | Independent Online | Zacharia Motsumi | SA needs new post Covid-19 approach to growing illicit tobacco sector           | <a href="https://www.iol.co.za/the-star/opinion-analysis/sa-needs-new-post-covid-19-approach-to-growing-illicit-tobacco-sector-6cc4b095-486f-42cf-a619-015e2e21e30a">https://www.iol.co.za/the-star/opinion-analysis/sa-needs-new-post-covid-19-approach-to-growing-illicit-tobacco-sector-6cc4b095-486f-42cf-a619-015e2e21e30a</a> |
| 299 | 2020-05-26 | Independent Online | Zintle Mahlati   | Dlamini Zuma insists on tobacco ban, denies friendship with Mazzotti            | <a href="https://www.iol.co.za/news/politics/dlamini-zuma-insists-on-tobacco-ban-denies-friendship-with-mazzotti-48520842">https://www.iol.co.za/news/politics/dlamini-zuma-insists-on-tobacco-ban-denies-friendship-with-mazzotti-48520842</a>                                                                                     |
| 300 | 2020-06-25 | Independent Online | IOL Reporter     | New cigarette ban petition takes aim at judges in Fita case                     | <a href="https://www.iol.co.za/news/politics/new-cigarette-ban-petition-takes-aim-at-judges-in-fita-case-49921779">https://www.iol.co.za/news/politics/new-cigarette-ban-petition-takes-aim-at-judges-in-fita-case-49921779</a>                                                                                                     |
| 301 | 2020-08-06 | Independent Online | Brandstories     | Cigarette producers call for end to lockdown ban                                | <a href="https://www.iol.co.za/news/partnered/cigarette-producers-call-for-end-to-lockdown-ban--eacf0ee4-b3e8-4395-b2fa-bcde063e04be">https://www.iol.co.za/news/partnered/cigarette-producers-call-for-end-to-lockdown-ban--eacf0ee4-b3e8-4395-b2fa-bcde063e04be</a>                                                               |



|     |            |                    |                  |                                                                                     |                                                                                                                                                                                                                                                                                                                                 |
|-----|------------|--------------------|------------------|-------------------------------------------------------------------------------------|---------------------------------------------------------------------------------------------------------------------------------------------------------------------------------------------------------------------------------------------------------------------------------------------------------------------------------|
| 302 | 2020-05-06 | Independent Online | Sihle Mavuso     | BAT no longer going to court over cigarette sale ban                                | <a href="https://www.iol.co.za/news/politics/bat-no-longer-going-to-court-over-cigarette-sale-ban-47605186">https://www.iol.co.za/news/politics/bat-no-longer-going-to-court-over-cigarette-sale-ban-47605186</a>                                                                                                               |
| 303 | 2020-06-08 | Independent Online | Baldwin Ndaba    | Fita to oppose attempts to postpone court hearing about lifting cigarette sales ban | <a href="https://www.iol.co.za/news/politics/fita-to-oppose-attempts-to-postpone-court-hearing-about-lifting-cigarette-sales-ban-49135685">https://www.iol.co.za/news/politics/fita-to-oppose-attempts-to-postpone-court-hearing-about-lifting-cigarette-sales-ban-49135685</a>                                                 |
| 304 | 2020-07-22 | Independent Online | Zintle Mahlati   | Government backtracks on tweet about alcohol, cigarette ban                         | <a href="https://www.iol.co.za/news/politics/government-backtracks-on-tweet-about-alcohol-cigarette-ban--e7b44c33-a7a2-4837-9e98-9da5222cce5a">https://www.iol.co.za/news/politics/government-backtracks-on-tweet-about-alcohol-cigarette-ban--e7b44c33-a7a2-4837-9e98-9da5222cce5a</a>                                         |
| 305 | 2020-04-29 | Independent Online | Marvin Charles   | SA loses R36m a day due to the sale of illicit cigarettes amid lockdown             | <a href="https://www.iol.co.za/capeargus/news/sa-loses-r36m-a-day-due-to-the-sale-of-illicit-cigarettes-amid-lockdown-47379414">https://www.iol.co.za/capeargus/news/sa-loses-r36m-a-day-due-to-the-sale-of-illicit-cigarettes-amid-lockdown-47379414</a>                                                                       |
| 306 | 2020-07-15 | Independent Online | Zelda Venter     | Fita states its case for leave to appeal ban on cigarettes                          | <a href="https://www.iol.co.za/pretoria-news/news/fita-states-its-case-for-leave-to-appeal-ban-on-cigarettes-51006347">https://www.iol.co.za/pretoria-news/news/fita-states-its-case-for-leave-to-appeal-ban-on-cigarettes-51006347</a>                                                                                         |
| 307 | 2020-05-01 | Independent Online | Lou-Anne Daniels | Lockdown level 4: BAT threatens court action over ban on cigarette sales            | <a href="https://www.iol.co.za/news/politics/lockdown-level-4-bat-threatens-court-action-over-ban-on-cigarette-sales-47456509">https://www.iol.co.za/news/politics/lockdown-level-4-bat-threatens-court-action-over-ban-on-cigarette-sales-47456509</a>                                                                         |
| 308 | 2020-06-04 | Independent Online | Loyiso Sidimba   | Cigarette sale ban: BATSA launches another attack                                   | <a href="https://www.iol.co.za/news/politics/cigarette-sale-ban-batsa-launches-another-attack-48964359">https://www.iol.co.za/news/politics/cigarette-sale-ban-batsa-launches-another-attack-48964359</a>                                                                                                                       |
| 309 | 2020-07-24 | Independent Online | Lou-Anne Daniels | 'Not surprised': FITA heads to Supreme Court of Appeal over ban on cigarette sales  | <a href="https://www.iol.co.za/news/politics/not-surprised-fita-heads-to-supreme-court-of-appeal-over-ban-on-cigarette-sales-ad446ef3-c575-493f-a956-8d7cabf147d3">https://www.iol.co.za/news/politics/not-surprised-fita-heads-to-supreme-court-of-appeal-over-ban-on-cigarette-sales-ad446ef3-c575-493f-a956-8d7cabf147d3</a> |
| 310 | 2020-05-27 | Independent Online | ANA Reporter     | Agricultural union requests judicial commission on illegal trade in cigarettes      | <a href="https://www.iol.co.za/news/politics/agricultural-union-requests-judicial-commission-on-illegal-trade-in-cigarettes-48568450">https://www.iol.co.za/news/politics/agricultural-union-requests-judicial-commission-on-illegal-trade-in-cigarettes-48568450</a>                                                           |

|     |            |                    |                |                                                                                     |                                                                                                                                                                                                                                                                                                         |
|-----|------------|--------------------|----------------|-------------------------------------------------------------------------------------|---------------------------------------------------------------------------------------------------------------------------------------------------------------------------------------------------------------------------------------------------------------------------------------------------------|
| 311 | 2020-06-01 | Independent Online | ANA Reporter   | BATSA wants court case on banning of cigarettes heard on June 22                    | <a href="https://www.iol.co.za/news/south-africa/batsa-wants-court-case-on-banning-of-cigarettes-heard-on-june-22-48826334">https://www.iol.co.za/news/south-africa/batsa-wants-court-case-on-banning-of-cigarettes-heard-on-june-22-48826334</a>                                                       |
| 312 | 2020-05-12 | Independent Online | Baldwin Ndaba  | Legal showdown between government and Fita put on hold for now                      | <a href="https://www.iol.co.za/news/politics/legal-showdown-between-government-and-fita-put-on-hold-for-now-47839831">https://www.iol.co.za/news/politics/legal-showdown-between-government-and-fita-put-on-hold-for-now-47839831</a>                                                                   |
| 313 | 2020-05-22 | Independent Online | Staff Reporter | Cigarette and alcohol sales may remain banned until 2021 - FMF CEO                  | <a href="https://www.iol.co.za/news/south-africa/kwazulu-natal/cigarette-and-alcohol-sales-may-remain-banned-until-2021-fmf-ceo-48404829">https://www.iol.co.za/news/south-africa/kwazulu-natal/cigarette-and-alcohol-sales-may-remain-banned-until-2021-fmf-ceo-48404829</a>                           |
| 314 | 2020-04-30 | Independent Online | IOL reporter   | Mboweni 'lost debate' on allowing sale of alcohol, cigarettes under Level 4         | <a href="https://www.iol.co.za/news/politics/mboweni-lost-debate-on-allowing-sale-of-alcohol-cigarettes-under-level-4-47406461">https://www.iol.co.za/news/politics/mboweni-lost-debate-on-allowing-sale-of-alcohol-cigarettes-under-level-4-47406461</a>                                               |
| 315 | 2020-04-18 | Independent Online | Sameer Naik    | We are going to court,' says Tobacco Association over cigarette ban during lockdown | <a href="https://www.iol.co.za/saturday-star/news/we-are-going-to-court-says-tobacco-association-over-cigarette-ban-during-lockdown-46869185">https://www.iol.co.za/saturday-star/news/we-are-going-to-court-says-tobacco-association-over-cigarette-ban-during-lockdown-46869185</a>                   |
| 316 | 2020-03-31 | Independent Online | Staff Reporter | Plea to repeal ban on sale of alcohol, cigarettes due to 'risks, discrimination'    | <a href="https://www.iol.co.za/capetimes/news/plea-to-repeal-ban-on-sale-of-alcohol-cigarettes-due-to-risks-discrimination-45813186">https://www.iol.co.za/capetimes/news/plea-to-repeal-ban-on-sale-of-alcohol-cigarettes-due-to-risks-discrimination-45813186</a>                                     |
| 317 | 2020-07-08 | Independent Online | Staff Reporter | Soapie actor among 5 nabbed for dealing in illicit cigarettes at Limpopo taxi rank  | <a href="https://www.iol.co.za/news/south-africa/limpopo/soapie-actor-among-5-nabbed-for-dealing-in-illicit-cigarettes-at-limpopo-taxi-rank-50593632">https://www.iol.co.za/news/south-africa/limpopo/soapie-actor-among-5-nabbed-for-dealing-in-illicit-cigarettes-at-limpopo-taxi-rank-50593632</a>   |
| 318 | 2020-08-07 | Independent Online | Marvin Charles | BATSA: 'What level of justification do you need for this tobacco ban?'              | <a href="https://www.iol.co.za/capeargus/news/batsa-what-level-of-justification-do-you-need-for-this-tobacco-ban-4998fe14-0606-4851-8558-08f53a5571ad">https://www.iol.co.za/capeargus/news/batsa-what-level-of-justification-do-you-need-for-this-tobacco-ban-4998fe14-0606-4851-8558-08f53a5571ad</a> |

|     |            |                    |               |                                                                                                   |                                                                                                                                                                                                                                                                                                                                                                       |
|-----|------------|--------------------|---------------|---------------------------------------------------------------------------------------------------|-----------------------------------------------------------------------------------------------------------------------------------------------------------------------------------------------------------------------------------------------------------------------------------------------------------------------------------------------------------------------|
| 319 | 2020-08-26 | Independent Online | Zelda Venter  | Fita withdraws pending appeal on sale of tobacco after settlement                                 | <a href="https://www.iol.co.za/pretoria-news/news/fita-withdraws-pending-appeal-on-sale-of-tobacco-after-settlement-6ab48e2d-4fa1-453d-87c5-afdc8c7781ee">https://www.iol.co.za/pretoria-news/news/fita-withdraws-pending-appeal-on-sale-of-tobacco-after-settlement-6ab48e2d-4fa1-453d-87c5-afdc8c7781ee</a>                                                         |
| 320 | 2020-10-07 | Independent Online | IOL           | Tobacco companies in SA may have aided, abetted illicit cigarette sales, report says              | <a href="https://www.iol.co.za/news/south-africa/tobacco-companies-in-sa-may-have-aided-abetted-illicit-cigarette-sales-report-says-07fd89c8-6ab5-47fd-a21e-a189e69772e2">https://www.iol.co.za/news/south-africa/tobacco-companies-in-sa-may-have-aided-abetted-illicit-cigarette-sales-report-says-07fd89c8-6ab5-47fd-a21e-a189e69772e2</a>                         |
| 321 | 2020-05-25 | Independent Online | Baldwin Ndaba | Tobacco industry guns for Ramaphosa in court                                                      | <a href="https://www.iol.co.za/news/politics/tobacco-industry-guns-for-ramaphosa-in-court-48507329">https://www.iol.co.za/news/politics/tobacco-industry-guns-for-ramaphosa-in-court-48507329</a>                                                                                                                                                                     |
| 322 | 2020-08-05 | Independent Online | Baldwin Ndaba | Pick n Pay boss enters liquor, cigarettes fray                                                    | <a href="https://www.iol.co.za/business-report/companies/pick-n-pay-boss-enters-liquor-cigarettes-fray-d871551a-281c-4828-8e12-6704cfd5b2ca">https://www.iol.co.za/business-report/companies/pick-n-pay-boss-enters-liquor-cigarettes-fray-d871551a-281c-4828-8e12-6704cfd5b2ca</a>                                                                                   |
| 323 | 2020-08-07 | Independent Online | ANA Reporter  | Dlamini Zuma submits affidavit to Appeal Court, BATSA hoping for 'swift end' to tobacco sales ban | <a href="https://www.iol.co.za/news/south-africa/dlamini-zuma-submits-affidavit-to-appeal-court-batsa-hoping-for-swift-end-to-tobacco-sales-ban-022575d0-86d6-4f49-93f1-a319b6547de9">https://www.iol.co.za/news/south-africa/dlamini-zuma-submits-affidavit-to-appeal-court-batsa-hoping-for-swift-end-to-tobacco-sales-ban-022575d0-86d6-4f49-93f1-a319b6547de9</a> |
| 324 | 2020-05-12 | Independent Online | Baldwin Ndaba | Fita seeks minutes of meeting where decision was taken to continue cigarette sale ban             | <a href="https://www.iol.co.za/news/politics/fita-seeks-minutes-of-meeting-where-decision-was-taken-to-continue-cigarette-sale-ban-47876693">https://www.iol.co.za/news/politics/fita-seeks-minutes-of-meeting-where-decision-was-taken-to-continue-cigarette-sale-ban-47876693</a>                                                                                   |
| 325 | 2020-07-09 | Independent Online | ANA Reporter  | Gauteng High Court, Pretoria to hear tobacco ban appeal                                           | <a href="https://www.iol.co.za/pretoria-news/gauteng-high-court-pretoria-to-hear-tobacco-ban-appeal-50741497">https://www.iol.co.za/pretoria-news/gauteng-high-court-pretoria-to-hear-tobacco-ban-appeal-50741497</a>                                                                                                                                                 |
| 326 | 2020-05-05 | Independent Online | Sihle Mavuso  | FITA says tobacco ban is increasing illicit trade of cigarettes                                   | <a href="https://www.iol.co.za/news/politics/fita-says-tobacco-ban-is-increasing-illicit-trade-of-cigarettes-47585340">https://www.iol.co.za/news/politics/fita-says-tobacco-ban-is-increasing-illicit-trade-of-cigarettes-47585340</a>                                                                                                                               |

|     |            |                    |                                              |                                                                                     |                                                                                                                                                                                                                                                                                                                                                               |
|-----|------------|--------------------|----------------------------------------------|-------------------------------------------------------------------------------------|---------------------------------------------------------------------------------------------------------------------------------------------------------------------------------------------------------------------------------------------------------------------------------------------------------------------------------------------------------------|
| 327 | 2020-05-11 | Independent Online | Edward West                                  | Smoking ban proves to be efficient, study finds                                     | <a href="https://www.iol.co.za/business-report/economy/smoking-ban-proves-to-be-efficient-study-finds-47814349">https://www.iol.co.za/business-report/economy/smoking-ban-proves-to-be-efficient-study-finds-47814349</a>                                                                                                                                     |
| 328 | 2020-05-24 | Independent Online | ANA Reporter                                 | From which planet does our lockdown tobacco law come from? asks FMF                 | <a href="https://www.iol.co.za/news/south-africa/from-which-planet-does-our-lockdown-tobacco-law-come-from-asks-fmf-48456759">https://www.iol.co.za/news/south-africa/from-which-planet-does-our-lockdown-tobacco-law-come-from-asks-fmf-48456759</a>                                                                                                         |
| 329 | 2020-07-04 | Independent Online | Sameer Naik                                  | Fita determined to go ahead with fight against tobacco ban                          | <a href="https://www.iol.co.za/saturday-star/news/fita-determined-to-go-ahead-with-fight-against-tobacco-ban-50387160">https://www.iol.co.za/saturday-star/news/fita-determined-to-go-ahead-with-fight-against-tobacco-ban-50387160</a>                                                                                                                       |
| 330 | 2020-08-04 | Independent Online | ANA Reporter                                 | Pick n Pay retrenches staff and implores government to review tobacco, alcohol bans | <a href="https://www.iol.co.za/business-report/companies/pick-n-pay-retrenches-staff-and-implores-government-to-review-tobacco-alcohol-bans-4772ecfa-2d97-44c8-a729-1086580a96c4">https://www.iol.co.za/business-report/companies/pick-n-pay-retrenches-staff-and-implores-government-to-review-tobacco-alcohol-bans-4772ecfa-2d97-44c8-a729-1086580a96c4</a> |
| 331 | 2020-05-05 | Independent Online | Professor Francois Steyn And Harriët Klopper | Cigarette ban backfiring with 7 million smokers against government decision         | <a href="https://www.iol.co.za/capeargus/opinion/cigarette-ban-backfiring-with-7-million-smokers-against-government-decision-47545171">https://www.iol.co.za/capeargus/opinion/cigarette-ban-backfiring-with-7-million-smokers-against-government-decision-47545171</a>                                                                                       |
| 332 | 2020-07-06 | Independent Online | Lou-Anne Daniels                             | As tobacco ban drags on, these smokers are demanding to have their voice heard      | <a href="https://www.iol.co.za/news/politics/as-tobacco-ban-drag-on-these-smokers-are-demanding-to-have-their-voice-heard-50495363">https://www.iol.co.za/news/politics/as-tobacco-ban-drag-on-these-smokers-are-demanding-to-have-their-voice-heard-50495363</a>                                                                                             |
| 333 | 2020-07-06 | Independent Online | Lou-Anne Daniels                             | As tobacco ban drags on, these smokers are demanding to have their voice heard      | <a href="https://www.iol.co.za/news/politics/as-tobacco-ban-drag-on-these-smokers-are-demanding-to-have-their-voice-heard-50495363">https://www.iol.co.za/news/politics/as-tobacco-ban-drag-on-these-smokers-are-demanding-to-have-their-voice-heard-50495363</a>                                                                                             |
| 334 | 2020-07-05 | Independent Online | Reeshnie Chetty                              | Smoking allowed at Durban casinos despite sale ban                                  | <a href="https://www.iol.co.za/sunday-tribune/news/smoking-allowed-at-durban-casinos-despite-sale-ban-50449274">https://www.iol.co.za/sunday-tribune/news/smoking-allowed-at-durban-casinos-despite-sale-ban-50449274</a>                                                                                                                                     |

|     |            |                    |                   |                                                                                    |                                                                                                                                                                                                                                                                                                                                                                       |
|-----|------------|--------------------|-------------------|------------------------------------------------------------------------------------|-----------------------------------------------------------------------------------------------------------------------------------------------------------------------------------------------------------------------------------------------------------------------------------------------------------------------------------------------------------------------|
| 335 | 2020-05-26 | Independent Online | Marvin Charles    | Vapour products industry tears into continued level 3 ban                          | <a href="https://www.iol.co.za/capeargus/news/vapour-products-industry-tears-into-continued-level-3-ban-48509313">https://www.iol.co.za/capeargus/news/vapour-products-industry-tears-into-continued-level-3-ban-48509313</a>                                                                                                                                         |
| 336 | 2020-08-12 | Independent Online | Staff Reporter    | Tobacco products worth over R1m seized near Paarl, four held in separate incidents | <a href="https://www.iol.co.za/news/south-africa/western-cape/tobacco-products-worth-over-r1m-seized-near-paarl-four-held-in-separate-incidents-37acd6c8-670d-4646-a399-d41165977f68">https://www.iol.co.za/news/south-africa/western-cape/tobacco-products-worth-over-r1m-seized-near-paarl-four-held-in-separate-incidents-37acd6c8-670d-4646-a399-d41165977f68</a> |
| 337 | 2020-06-18 | Independent Online | Staff Reporter    | R1.3m contraband cigarettes confiscated at Farazella border                        | <a href="https://www.iol.co.za/news/south-africa/r13m-contraband-cigarettes-confiscated-at-farazella-border-49586229">https://www.iol.co.za/news/south-africa/r13m-contraband-cigarettes-confiscated-at-farazella-border-49586229</a>                                                                                                                                 |
| 338 | 2020-05-03 | Independent Online | Manyane Manyane   | Lawyers threaten Ramaphosa's National Command Council                              | <a href="https://www.iol.co.za/sundayindependent/news/lawyers-threaten-ramaphosas-national-command-council-47489065">https://www.iol.co.za/sundayindependent/news/lawyers-threaten-ramaphosas-national-command-council-47489065</a>                                                                                                                                   |
| 339 | 2020-01-05 | Independent Online | Marvin Charles    | Ramaphosa, Dlamini-Zuma head to SCA over tobacco ban ruling                        | <a href="https://www.iol.co.za/news/politics/ramaphosa-dlamini-zuma-head-to-sca-over-tobacco-ban-ruling-322316c5-4d67-49fb-94ff-0f511c82535d">https://www.iol.co.za/news/politics/ramaphosa-dlamini-zuma-head-to-sca-over-tobacco-ban-ruling-322316c5-4d67-49fb-94ff-0f511c82535d</a>                                                                                 |
| 340 | 2020-08-20 | Mail & Guardian    | Tshegofatso Mathe | Sars plan for illicit tobacco still being refined                                  | <a href="https://mg.co.za/business/2020-08-22-sars-plan-for-illicit-tobacco-still-being-refined/">https://mg.co.za/business/2020-08-22-sars-plan-for-illicit-tobacco-still-being-refined/</a>                                                                                                                                                                         |
| 341 | 2020-08-07 | Mail & Guardian    | Special Reports   | Smokers hold thumbs for cigarette ban to be lifted                                 | <a href="https://mg.co.za/special-reports/2020-08-07-smokers-hold-thumbs-for-cigarette-ban-to-be-lifted/">https://mg.co.za/special-reports/2020-08-07-smokers-hold-thumbs-for-cigarette-ban-to-be-lifted/</a>                                                                                                                                                         |
| 342 | 2020-06-05 | Mail & Guardian    | Tshegofatso Mathe | Cigarette sales ban battle looms                                                   | <a href="https://mg.co.za/business/2020-06-05-cigarette-sales-ban-battle-looms/">https://mg.co.za/business/2020-06-05-cigarette-sales-ban-battle-looms/</a>                                                                                                                                                                                                           |
| 343 | 2020-05-28 | Mail & Guardian    | Alex Norcia       | How South Africa's Coronavirus Tobacco Prohibition Backfired                       | <a href="https://filtermag.org/south-africa-coronavirus-cigarettes-ban/">https://filtermag.org/south-africa-coronavirus-cigarettes-ban/</a>                                                                                                                                                                                                                           |
| 344 | 2020-05-01 | News24             | Jan Gerber        | Bizarre and irregular' - British American Tobacco on government's tobacco ban      | <a href="https://www.news24.com/news24/southafrica/news/bizarre-and-irregular-british-american-tobacco-on-governments-tobacco-ban-20200501">https://www.news24.com/news24/southafrica/news/bizarre-and-irregular-british-american-tobacco-on-governments-tobacco-ban-20200501</a>                                                                                     |

|     |            |        |                                   |                                                                                                          |                                                                                                                                                                                                                                                                                                                                                                               |
|-----|------------|--------|-----------------------------------|----------------------------------------------------------------------------------------------------------|-------------------------------------------------------------------------------------------------------------------------------------------------------------------------------------------------------------------------------------------------------------------------------------------------------------------------------------------------------------------------------|
| 345 | 2020-05-04 | News24 | Staff Reporter                    | Second tobacco company takes on government on urgent basis                                               | <a href="https://www.news24.com/citypress/news/second-tobacco-company-takes-on-government-on-urgent-basis-20200504">https://www.news24.com/citypress/news/second-tobacco-company-takes-on-government-on-urgent-basis-20200504</a>                                                                                                                                             |
| 346 | 2020-05-04 | News24 | Staff Reporter                    | Tobacco ban was not taken lightly – Ramaphosa                                                            | <a href="https://www.news24.com/citypress/news/tobacco-ban-was-not-taken-lightly-ramaphosa-20200504">https://www.news24.com/citypress/news/tobacco-ban-was-not-taken-lightly-ramaphosa-20200504</a>                                                                                                                                                                           |
| 347 | 2020-05-02 | News24 | Staff Reporter                    | Coronavirus morning update: Level 4 lockdown just started but already a warning - reversing it is 'easy' | <a href="https://www.health24.com/Medical/Infectious-diseases/Coronavirus/coronavirus-morning-update-level-4-lockdown-just-started-but-already-a-warning-reversing-it-is-easy-20200502-2">https://www.health24.com/Medical/Infectious-diseases/Coronavirus/coronavirus-morning-update-level-4-lockdown-just-started-but-already-a-warning-reversing-it-is-easy-20200502-2</a> |
| 348 | 2020-05-06 | News24 | Jan Cronje                        | SA's largest cigarette company drops proposed legal action against tobacco ban                           | <a href="https://www.news24.com/fin24/economy/sas-largest-cigarette-company-drops-proposed-legal-action-against-tobacco-ban-20200506">https://www.news24.com/fin24/economy/sas-largest-cigarette-company-drops-proposed-legal-action-against-tobacco-ban-20200506</a>                                                                                                         |
| 349 | 2020-05-06 | News24 | Phakamani Mvelashe                | Free State man on buying cigarettes from the black market: "I can't quit"                                | <a href="https://www.news24.com/drum/news/free-state-man-on-buying-cigarettes-from-the-black-market-i-cant-quit-20200506">https://www.news24.com/drum/news/free-state-man-on-buying-cigarettes-from-the-black-market-i-cant-quit-20200506</a>                                                                                                                                 |
| 350 | 2020-05-08 | News24 | Lizeka Tandwa                     | Ramaphosa hit with another letter questioning lawfulness of the NCCC                                     | <a href="https://www.news24.com/news24/southafrica/news/ramaphosa-hit-with-another-letter-questioning-lawfulness-of-the-nccc-20200508">https://www.news24.com/news24/southafrica/news/ramaphosa-hit-with-another-letter-questioning-lawfulness-of-the-nccc-20200508</a>                                                                                                       |
| 351 | 2020-05-10 | News24 | Alex Mitchley and Murray Williams | Smoke and mirrors: 4 minutes – that's how long it took to find banned cigarettes during lockdown         | <a href="https://www.news24.com/news24/southafrica/news/smoke-and-mirrors-4-minutes-thats-how-long-it-took-to-find-banned-cigarettes-during-lockdown-20200510">https://www.news24.com/news24/southafrica/news/smoke-and-mirrors-4-minutes-thats-how-long-it-took-to-find-banned-cigarettes-during-lockdown-20200510</a>                                                       |
| 352 | 2020-08-17 | News24 | Khulekani Magubane                | Tensions loom between tobacco producers as ban lifts                                                     | <a href="https://www.news24.com/fin24/companies/industrial/tensions-loom-between-tobacco-producers-and-ban-lifts-20200817">https://www.news24.com/fin24/companies/industrial/tensions-loom-between-tobacco-producers-and-ban-lifts-20200817</a>                                                                                                                               |



|     |            |        |                                          |                                                                                                  |                                                                                                                                                                                                                                                                                                             |
|-----|------------|--------|------------------------------------------|--------------------------------------------------------------------------------------------------|-------------------------------------------------------------------------------------------------------------------------------------------------------------------------------------------------------------------------------------------------------------------------------------------------------------|
| 353 | 2020-07-09 | News24 | Jan Cronje                               | Court agrees to hear bid by tobacco group for leave to appeal ruling that kept cigarettes banned | <a href="https://www.news24.com/fin24/economy/court-agrees-to-hear-bid-by-tobacco-group-for-leave-to-appeal-ruling-that-kept-cigarettes-banned-20200709">https://www.news24.com/fin24/economy/court-agrees-to-hear-bid-by-tobacco-group-for-leave-to-appeal-ruling-that-kept-cigarettes-banned-20200709</a> |
| 354 | 2020-06-26 | News24 | Londiwe Buthelezi                        | Government denies delaying BATSA tobacco ban case                                                | <a href="https://www.news24.com/fin24/economy/government-denies-delaying-batsa-tobacco-ban-case-20200626">https://www.news24.com/fin24/economy/government-denies-delaying-batsa-tobacco-ban-case-20200626</a>                                                                                               |
| 355 | 2020-06-25 | News24 | Murray Williams & Marelise van der Merwe | BATSA, Dlamini-Zuma set to face off in court next week over cigarette ban                        | <a href="https://www.news24.com/fin24/companies/agribusiness/just-in-batsa-dlamini-zuma-set-to-face-off-in-court-next-week-20200625">https://www.news24.com/fin24/companies/agribusiness/just-in-batsa-dlamini-zuma-set-to-face-off-in-court-next-week-20200625</a>                                         |
| 356 | 2020-09-07 | News24 | Prinesha Naidoo, Bloomberg               | SA booze, tobacco ban created new criminal networks                                              | <a href="https://www.news24.com/fin24/economy/sa-booze-tobacco-ban-created-new-criminal-networks-20200907">https://www.news24.com/fin24/economy/sa-booze-tobacco-ban-created-new-criminal-networks-20200907</a>                                                                                             |
| 357 | 2020-09-03 | News24 | Khulekani Magubane                       | It's not just the economy, Kieswetter says on SARS collection troubles                           | <a href="https://www.news24.com/fin24/economy/south-africa/its-not-just-the-economy-kieswetter-says-on-sars-collection-troubles-20200903">https://www.news24.com/fin24/economy/south-africa/its-not-just-the-economy-kieswetter-says-on-sars-collection-troubles-20200903</a>                               |
| 358 | 2020-08-19 | News24 | Khulekani Magubane                       | Illicit smokes will not vanish overnight, warns BATSA boss as ban lifted                         | <a href="https://www.news24.com/fin24/economy/south-africa/illicit-smokes-will-not-vanish-overnight-warns-batsa-boss-as-ban-lifted-20200819">https://www.news24.com/fin24/economy/south-africa/illicit-smokes-will-not-vanish-overnight-warns-batsa-boss-as-ban-lifted-20200819</a>                         |
| 359 | 2020-08-17 | News24 | Staff Reporter                           | All the new rules for Level 2, including how many people can come over for a braai               | <a href="https://www.businessinsider.co.za/level-2-lockdown-rules-2020-8">https://www.businessinsider.co.za/level-2-lockdown-rules-2020-8</a>                                                                                                                                                               |
| 360 | 2020-08-16 | News24 | Azarrah Karrim                           | Lockdown: Level 2 officially starts on Tuesday morning                                           | <a href="https://www.news24.com/news24/southafrica/news/lockdown-level-2-officially-starts-on-tuesday-morning-20200816">https://www.news24.com/news24/southafrica/news/lockdown-level-2-officially-starts-on-tuesday-morning-20200816</a>                                                                   |
| 361 | 2020-08-16 | News24 | Palesa Dlamini                           | Move to level 2 nothing to be applauded, say opposition parties                                  | <a href="https://www.news24.com/citypress/news/move-to-level-2-nothing-to-be-applauded-say-opposition-parties-20200816">https://www.news24.com/citypress/news/move-to-level-2-nothing-to-be-applauded-say-opposition-parties-20200816</a>                                                                   |

|     |            |        |                   |                                                                                                      |                                                                                                                                                                                                                                                                                                                                       |
|-----|------------|--------|-------------------|------------------------------------------------------------------------------------------------------|---------------------------------------------------------------------------------------------------------------------------------------------------------------------------------------------------------------------------------------------------------------------------------------------------------------------------------------|
| 362 | 2020-08-16 | News24 | Jan Gerber        | Too little, too late - opposition responds to easing of lockdown regulations                         | <a href="https://www.news24.com/news24/southafrica/news/too-little-too-late-opposition-responds-to-easing-of-lockdown-regulations-20200816">https://www.news24.com/news24/southafrica/news/too-little-too-late-opposition-responds-to-easing-of-lockdown-regulations-20200816</a>                                                     |
| 363 | 2020-05-18 | News24 | Mandisa Nyathi    | Surge in patients being treated for illnesses related to home-made booze                             | <a href="https://www.news24.com/citypress/news/surge-in-patients-being-treated-for-illnesses-related-to-home-made-booze-20200518">https://www.news24.com/citypress/news/surge-in-patients-being-treated-for-illnesses-related-to-home-made-booze-20200518</a>                                                                         |
| 364 | 2020-08-05 | News24 | Queenin Masuabi   | Tobacco industry given confidence boost by chance to appeal ban                                      | <a href="https://www.news24.com/citypress/news/tobacco-industry-given-confidence-boost-by-chance-to-appeal-ban-20200805">https://www.news24.com/citypress/news/tobacco-industry-given-confidence-boost-by-chance-to-appeal-ban-20200805</a>                                                                                           |
| 365 | 2020-07-17 | News24 | Azarrah Karrim    | NICD director cautions against smoking, says getting evidence of links to 'severe' Covid-19 is hard  | <a href="https://www.news24.com/news24/southafrica/news/no-direct-evidence-linking-smoking-with-severe-covid-19-but-not-a-good-idea-says-nicd-director-20200717">https://www.news24.com/news24/southafrica/news/no-direct-evidence-linking-smoking-with-severe-covid-19-but-not-a-good-idea-says-nicd-director-20200717</a>           |
| 366 | 2020-07-13 | News24 | Penelope Mashego  | We were blindsided by fresh ban, says alcohol industry                                               | <a href="https://www.news24.com/fin24/companies/agribusiness/we-were-blindsided-by-fresh-ban-says-alcohol-industry-20200713">https://www.news24.com/fin24/companies/agribusiness/we-were-blindsided-by-fresh-ban-says-alcohol-industry-20200713</a>                                                                                   |
| 367 | 2020-06-23 | News24 | Jan Gerber        | Dodging questions: Dlamini-Zuma does not have available the reasons a state of disaster was declared | <a href="https://www.news24.com/news24/southafrica/news/dodging-questions-dlamini-zuma-does-not-have-the-reasons-a-state-of-disaster-was-declared-available-20200623">https://www.news24.com/news24/southafrica/news/dodging-questions-dlamini-zuma-does-not-have-the-reasons-a-state-of-disaster-was-declared-available-20200623</a> |
| 368 | 2020-06-11 | News24 | Londiwe Buthelezi | ANALYSIS   Here's how the state justified the tobacco ban in court. Will it be enough?               | <a href="https://www.news24.com/fin24/economy/analysis-heres-how-the-state-justified-the-tobacco-ban-in-court-will-it-be-enough-20200611">https://www.news24.com/fin24/economy/analysis-heres-how-the-state-justified-the-tobacco-ban-in-court-will-it-be-enough-20200611</a>                                                         |
| 369 | 2020-06-08 | News24 | Gcina Ntsaluba    | Tobacco ban creates flourishing illicit market                                                       | <a href="https://www.news24.com/citypress/news/tobacco-ban-creates-flourishing-illicit-market-20200608">https://www.news24.com/citypress/news/tobacco-ban-creates-flourishing-illicit-market-20200608</a>                                                                                                                             |

|     |            |           |                                    |                                                                                                     |                                                                                                                                                                                                                                                                                                                     |
|-----|------------|-----------|------------------------------------|-----------------------------------------------------------------------------------------------------|---------------------------------------------------------------------------------------------------------------------------------------------------------------------------------------------------------------------------------------------------------------------------------------------------------------------|
| 370 | 2020-06-04 | News24    | Azarrah Karrim                     | Lockdown: AfriForum lays charges with UN human rights body over 'draconic regulations'              | <a href="https://www.news24.com/news24/southafrica/news/lockdown-afriforum-lays-charges-with-un-human-rights-body-over-draconic-regulations-20200604">https://www.news24.com/news24/southafrica/news/lockdown-afriforum-lays-charges-with-un-human-rights-body-over-draconic-regulations-20200604</a>               |
| 371 | 2020-05-29 | News24    | Lizeka Tandwa                      | Cigarette sales ban: DA labels Nkosazana Dlamini-Zuma a 'liar', says Ramaphosa should 'fire' her    | <a href="https://www.news24.com/news24/southafrica/news/cigarette-sales-ban-da-labels-nkosazana-dlamini-zuma-a-liar-says-ramaphosa-should-fire-her-20200529">https://www.news24.com/news24/southafrica/news/cigarette-sales-ban-da-labels-nkosazana-dlamini-zuma-a-liar-says-ramaphosa-should-fire-her-20200529</a> |
| 372 | 2020-05-11 | News24    | Lameez Omarjee and Jan Cronje      | Lockdown   Govt agrees to provide reasons for ban on cigarette sales                                | <a href="https://www.news24.com/fin24/Economy/lockdown-govt-agrees-to-provide-reasons-for-ban-on-cigarette-sales-20200511">https://www.news24.com/fin24/Economy/lockdown-govt-agrees-to-provide-reasons-for-ban-on-cigarette-sales-20200511</a>                                                                     |
| 373 | 2020-08-02 | News24    | Murray Williams                    | Lockdown cigarette wars: Govt admits smokers 'less likely to be infected' with coronavirus   News24 | <a href="https://www.news24.com/news24/southafrica/news/lockdown-cigarette-wars-govt-admits-smokers-less-likely-to-be-infected-with-coronavirus-20200802">https://www.news24.com/news24/southafrica/news/lockdown-cigarette-wars-govt-admits-smokers-less-likely-to-be-infected-with-coronavirus-20200802</a>       |
| 374 | 2020-07-02 | News24    | Riaan Grobler                      | Lockdown: Public concern about rise in violence following lifting of booze ban, survey finds        | <a href="https://www.news24.com/news24/southafrica/news/lockdown-public-concern-about-rise-in-violence-following-lifting-of-booze-ban-survey-finds-20200702">https://www.news24.com/news24/southafrica/news/lockdown-public-concern-about-rise-in-violence-following-lifting-of-booze-ban-survey-finds-20200702</a> |
| 375 | 2020-05-24 | News24    | Lameez Omarjee                     | Lockdown   Cigarette ban to remain under level 3, but you can buy booze                             | <a href="https://www.news24.com/fin24/Economy/lockdown-cigarette-ban-to-remain-under-level-3-but-you-can-buy-booze-20200524">https://www.news24.com/fin24/Economy/lockdown-cigarette-ban-to-remain-under-level-3-but-you-can-buy-booze-20200524</a>                                                                 |
| 376 | 2020-08-19 | Reuters   | Tumelo Modiba and Promit Mukherjee | South African smokers empty shops of cigarettes after ban lifted - Reuters Africa                   | <a href="https://www.reuters.com/article/us-health-coronavirus-safrica-tobacco-idUSKCN25E2FM">https://www.reuters.com/article/us-health-coronavirus-safrica-tobacco-idUSKCN25E2FM</a>                                                                                                                               |
| 377 | 2020-08-06 | SABC News | SABC News                          | Cigarette sales ban legal battle continues on Thursday                                              | <a href="https://www.sabcnews.com/sabcnews/cigarette-sales-ban-legal-battle-continues-on-thursday/">https://www.sabcnews.com/sabcnews/cigarette-sales-ban-legal-battle-continues-on-thursday/</a>                                                                                                                   |
| 378 | 2020-05-05 | SABC News | Naledi Ngcobo                      | Tobacco lobby groups gear up to fight cigarette sale ban                                            | <a href="https://www.sabcnews.com/sabcnews/tobacco-lobby-groups-gear-up-to-fight-cigarette-sale-ban/">https://www.sabcnews.com/sabcnews/tobacco-lobby-groups-gear-up-to-fight-cigarette-sale-ban/</a>                                                                                                               |

|     |            |           |                     |                                                                                      |                                                                                                                                                                                                                                                         |
|-----|------------|-----------|---------------------|--------------------------------------------------------------------------------------|---------------------------------------------------------------------------------------------------------------------------------------------------------------------------------------------------------------------------------------------------------|
| 379 | 2020-05-02 | SABC News | Staff Reporter      | British American Tobacco threatens legal action over cigarette ban                   | <a href="https://www.sabcnews.com/sabcnews/british-american-tobacco-threatens-legal-action-over-cigarette-ban/">https://www.sabcnews.com/sabcnews/british-american-tobacco-threatens-legal-action-over-cigarette-ban/</a>                               |
| 380 | 2020-10-30 | SABC News | Tashlan Naidoo      | Lobby group calls for 100% tax hike on tobacco products                              | <a href="https://www.sabcnews.com/sabcnews/lobby-group-calls-for-100-tax-hike-on-tobacco-products/">https://www.sabcnews.com/sabcnews/lobby-group-calls-for-100-tax-hike-on-tobacco-products/</a>                                                       |
| 381 | 2020-08-18 | SABC News | Staff Reporter      | Dlamini-Zuma defends five month ban on sale of cigarettes                            | <a href="https://www.sabcnews.com/sabcnews/dlamini-zuma-defends-five-month-ban-on-sale-of-cigarettes/">https://www.sabcnews.com/sabcnews/dlamini-zuma-defends-five-month-ban-on-sale-of-cigarettes/</a>                                                 |
| 382 | 2020-08-17 | SABC News | Staff Reporter      | Tobacco industry relieved ban has been lifted                                        | <a href="https://www.sabcnews.com/sabcnews/tobacco-industry-relieved-ban-has-been-lifted/">https://www.sabcnews.com/sabcnews/tobacco-industry-relieved-ban-has-been-lifted/</a>                                                                         |
| 383 | 2020-08-15 | SABC News | Aphumelele Mdlalane | SCA grants FITA leave to appeal tobacco sales ban                                    | <a href="https://www.sabcnews.com/sabcnews/sca-grants-fita-leave-to-appeal-tobacco-sales-ban/">https://www.sabcnews.com/sabcnews/sca-grants-fita-leave-to-appeal-tobacco-sales-ban/</a>                                                                 |
| 384 | 2020-08-11 | SABC News | Staff Reporter      | FITA submits papers to the SCA as cigarette ban battle rages on                      | <a href="https://www.sabcnews.com/sabcnews/fita-submits-papers-to-the-sca-as-cigarette-ban-battle-rages-on/">https://www.sabcnews.com/sabcnews/fita-submits-papers-to-the-sca-as-cigarette-ban-battle-rages-on/</a>                                     |
| 385 | 2020-08-04 | SABC News | Makgala Masiteng    | Supreme Court of Appeal grants FITA leave to appeal tobacco judgment                 | <a href="https://www.sabcnews.com/sabcnews/supreme-court-of-appeal-grants-fita-leave-to-appeal-tobacco-judgment/">https://www.sabcnews.com/sabcnews/supreme-court-of-appeal-grants-fita-leave-to-appeal-tobacco-judgment/</a>                           |
| 386 | 2020-07-31 | SABC News | Katlego Nyoni       | Farmers decry continued ban on tobacco products, 'will result in massive job losses' | <a href="https://www.sabcnews.com/sabcnews/farmers-decry-continued-ban-on-tobacco-products-will-result-in-massive-job-losses/">https://www.sabcnews.com/sabcnews/farmers-decry-continued-ban-on-tobacco-products-will-result-in-massive-job-losses/</a> |
| 387 | 2020-07-28 | SABC News | Makgala Masiteng    | FITA to petition SCA to hear appeal opposing tobacco ban                             | <a href="https://www.sabcnews.com/sabcnews/fita-to-petition-sca-to-hear-appeal-opposing-tobacco-ban/">https://www.sabcnews.com/sabcnews/fita-to-petition-sca-to-hear-appeal-opposing-tobacco-ban/</a>                                                   |
| 388 | 2020-07-25 | SABC News | Thabile Mbhele      | Nationwide protest against tobacco ban                                               | <a href="https://www.sabcnews.com/sabcnews/nationwide-protest-against-tobacco-ban/">https://www.sabcnews.com/sabcnews/nationwide-protest-against-tobacco-ban/</a>                                                                                       |
| 389 | 2020-07-25 | SABC News | Staff Reporter      | Fita concerned about government's transparency on tobacco ban                        | <a href="https://www.sabcnews.com/sabcnews/fita-concerned-about-governments-transparency-on-tobacco-ban/">https://www.sabcnews.com/sabcnews/fita-concerned-about-governments-transparency-on-tobacco-ban/</a>                                           |

|     |            |           |                 |                                                                                            |                                                                                                                                                                                                                                                                           |
|-----|------------|-----------|-----------------|--------------------------------------------------------------------------------------------|---------------------------------------------------------------------------------------------------------------------------------------------------------------------------------------------------------------------------------------------------------------------------|
| 390 | 2020-07-24 | SABC News | Staff Reporter  | FITA's bid to have tobacco sales ban lifted suffers another blow                           | <a href="https://www.sabcnews.com/sabcnews/fita-bid-to-have-tobacco-sales-ban-lifted-suffers-another-blow/">https://www.sabcnews.com/sabcnews/fita-bid-to-have-tobacco-sales-ban-lifted-suffers-another-blow/</a>                                                         |
| 391 | 2020-07-15 | SABC News | Staff Reporter  | FITA takes cigarette ban fight back to court                                               | <a href="https://www.sabcnews.com/sabcnews/fita-takes-cigarette-ban-fight-back-to-court/">https://www.sabcnews.com/sabcnews/fita-takes-cigarette-ban-fight-back-to-court/</a>                                                                                             |
| 392 | 2020-07-09 | SABC News | Staff Reporter  | FITA granted permission to appeal tobacco sales ban                                        | <a href="https://www.sabcnews.com/sabcnews/fita-granted-permission-to-appeal-tobacco-sales-ban/">https://www.sabcnews.com/sabcnews/fita-granted-permission-to-appeal-tobacco-sales-ban/</a>                                                                               |
| 393 | 2020-06-30 | SABC News | Jabulani Baloi  | Four suspected illicit cigarette smugglers arrested in Musina                              | <a href="https://www.sabcnews.com/sabcnews/four-suspected-illicit-cigarette-smugglers-arrested-in-musina/">https://www.sabcnews.com/sabcnews/four-suspected-illicit-cigarette-smugglers-arrested-in-musina/</a>                                                           |
| 394 | 2020-06-27 | SABC News | Staff Reporter  | FITA could appeal tobacco ban judgement: Tax Justice SA                                    | <a href="https://www.sabcnews.com/sabcnews/fita-could-appeal-tobacco-ban-judgement-tax-justice-sa/">https://www.sabcnews.com/sabcnews/fita-could-appeal-tobacco-ban-judgement-tax-justice-sa/</a>                                                                         |
| 395 | 2020-06-26 | SABC News | Staff Reporter  | FITA mulls way forward after failed bid to overturn ban on tobacco product sales           | <a href="https://www.sabcnews.com/sabcnews/fita-mulls-way-forward-after-failed-bid-to-overturn-ban-on-tobacco-product-sales/">https://www.sabcnews.com/sabcnews/fita-mulls-way-forward-after-failed-bid-to-overturn-ban-on-tobacco-product-sales/</a>                     |
| 396 | 2020-06-26 | SABC News | Staff Reporter  | FITA's tobacco sales case dismissed                                                        | <a href="https://www.sabcnews.com/sabcnews/fita-tobacco-sales-case-dismissed/">https://www.sabcnews.com/sabcnews/fita-tobacco-sales-case-dismissed/</a>                                                                                                                   |
| 397 | 2020-06-26 | SABC News | Staff Reporter  | FITA understands the court has to make a complicated judgment on lifting tobacco sales ban | <a href="https://www.sabcnews.com/sabcnews/fita-understands-the-court-has-to-make-a-complicated-judgment-on-lifting-tobacco-sales-ban/">https://www.sabcnews.com/sabcnews/fita-understands-the-court-has-to-make-a-complicated-judgment-on-lifting-tobacco-sales-ban/</a> |
| 398 | 2020-06-14 | SABC News | Manelisi Dubase | Smokers protest in Cape Town over continued cigarette ban                                  | <a href="https://www.sabcnews.com/sabcnews/smokers-protest-in-cape-town-over-continued-cigarette-ban/">https://www.sabcnews.com/sabcnews/smokers-protest-in-cape-town-over-continued-cigarette-ban/</a>                                                                   |
| 399 | 2020-06-10 | SABC News | Tshepiso Moche  | Court hears tobacco products sales matter                                                  | <a href="https://www.sabcnews.com/sabcnews/court-hears-tobacco-products-sales-matter/">https://www.sabcnews.com/sabcnews/court-hears-tobacco-products-sales-matter/</a>                                                                                                   |
| 400 | 2020-06-09 | SABC News | Staff Reporter  | Legality of tobacco ban to be heard in court                                               | <a href="https://www.sabcnews.com/sabcnews/legality-of-tobacco-ban-to-be-heard-in-court/">https://www.sabcnews.com/sabcnews/legality-of-tobacco-ban-to-be-heard-in-court/</a>                                                                                             |

|     |            |           |                 |                                                                                   |                                                                                                                                                                                                                                                         |
|-----|------------|-----------|-----------------|-----------------------------------------------------------------------------------|---------------------------------------------------------------------------------------------------------------------------------------------------------------------------------------------------------------------------------------------------------|
| 401 | 2020-06-06 | SABC News | Mercedes Besent | President Ramaphosa gives clarity on decision to ban tobacco sales                | <a href="https://www.sabcnews.com/sabcnews/president-ramaphosa-gives-clarity-on-decision-to-ban-tobacco/">https://www.sabcnews.com/sabcnews/president-ramaphosa-gives-clarity-on-decision-to-ban-tobacco/</a>                                           |
| 402 | 2020-06-06 | SABC News | Lubabalo Dada   | Eastern Cape government warns of disastrous consequences if tobacco sales allowed | <a href="https://www.sabcnews.com/sabcnews/eastern-cape-government-warns-of-disastrous-consequences-if-tobacco-sales-allowed/">https://www.sabcnews.com/sabcnews/eastern-cape-government-warns-of-disastrous-consequences-if-tobacco-sales-allowed/</a> |
| 403 | 2020-06-03 | SABC News | Staff Reporter  | Cop nabbed in possession of a consignment of cigarettes                           | <a href="https://www.sabcnews.com/sabcnews/cop-nabbed-in-possession-of-a-consignment-of-cigarettes/">https://www.sabcnews.com/sabcnews/cop-nabbed-in-possession-of-a-consignment-of-cigarettes/</a>                                                     |
| 404 | 2020-05-31 | SABC News | Staff Reporter  | Government made mistake in the way it communicated cigarette ban: Ramaphosa       | <a href="https://www.sabcnews.com/sabcnews/government-made-mistake-in-way-it-communicated-cigarette-ban-ramaphosa/">https://www.sabcnews.com/sabcnews/government-made-mistake-in-way-it-communicated-cigarette-ban-ramaphosa/</a>                       |
| 405 | 2020-05-29 | SABC News | Staff Reporter  | BATSA to file an urgent court application against tobacco sales ban               | <a href="https://www.sabcnews.com/sabcnews/british-american-tobacco-to-file-an-urgent-court-application/">https://www.sabcnews.com/sabcnews/british-american-tobacco-to-file-an-urgent-court-application/</a>                                           |
| 406 | 2020-05-28 | SABC News | Staff Reporter  | AfriForum gives Dlamini-Zuma ultimatum as battle over cigarette sale ban rages on | <a href="https://www.sabcnews.com/sabcnews/afriforum-gives-dlamini-zuma-ultimatum-as-battle-over-cigarette-sale-ban-rages-on/">https://www.sabcnews.com/sabcnews/afriforum-gives-dlamini-zuma-ultimatum-as-battle-over-cigarette-sale-ban-rages-on/</a> |
| 407 | 2020-05-24 | SABC News | Staff Reporter  | Alcohol sale to be allowed under level 3 lockdown, tobacco sales remain banned    | <a href="https://www.sabcnews.com/sabcnews/alcohol-sale-to-be-allowed-under-level-3-lockdown-tobacco-sales-remain-banned/">https://www.sabcnews.com/sabcnews/alcohol-sale-to-be-allowed-under-level-3-lockdown-tobacco-sales-remain-banned/</a>         |
| 408 | 2020-05-23 | SABC News | Thabile Mbhele  | Ethiopian busted with thousands cartons of illicit cigarettes                     | <a href="https://www.sabcnews.com/sabcnews/ethiopian-busted-with-thousands-cartons-of-illicit-cigarettes/">https://www.sabcnews.com/sabcnews/ethiopian-busted-with-thousands-cartons-of-illicit-cigarettes/</a>                                         |
| 409 | 2020-05-16 | SABC News | Staff Reporter  | 7 arrested for illegal possession of counterfeit cigarettes, hair weaves          | <a href="https://www.sabcnews.com/sabcnews/7-arrested-for-illegal-possession-of-counterfeit-cigarettes-hair-weaves/">https://www.sabcnews.com/sabcnews/7-arrested-for-illegal-possession-of-counterfeit-cigarettes-hair-weaves/</a>                     |
| 410 | 2020-05-12 | SABC News | Tshepiso Moche  | Fita halts legal action over ban on sale of cigarettes                            | <a href="https://www.sabcnews.com/sabcnews/fita-halts-legal-action-over-ban-on-sale-of-cigarettes/">https://www.sabcnews.com/sabcnews/fita-halts-legal-action-over-ban-on-sale-of-cigarettes/</a>                                                       |



|     |            |           |                  |                                                                                |                                                                                                                                                                                                                                                         |
|-----|------------|-----------|------------------|--------------------------------------------------------------------------------|---------------------------------------------------------------------------------------------------------------------------------------------------------------------------------------------------------------------------------------------------------|
| 411 | 2020-05-11 | SABC News | Sashin Naidoo    | Smokers share their struggles and victories amid tobacco sale ban              | <a href="https://www.sabcnews.com/sabcnews/smokers-share-their-struggles-and-victories-amid-tobacco-sale-ban/">https://www.sabcnews.com/sabcnews/smokers-share-their-struggles-and-victories-amid-tobacco-sale-ban/</a>                                 |
| 412 | 2020-05-06 | SABC News | Staff Reporter   | Liquor association urges easing on alcohol ban                                 | <a href="https://www.sabcnews.com/sabcnews/liquor-association-urges-easing-on-alcohol-ban/">https://www.sabcnews.com/sabcnews/liquor-association-urges-easing-on-alcohol-ban/</a>                                                                       |
| 413 | 2020-05-06 | SABC News | Tshepiso Moche   | BATSA aborts decision to pursue legal action cigarette sale ban                | <a href="https://www.sabcnews.com/sabcnews/batsa-aborts-decision-to-pursue-legal-action-cigarette-sale-ban/">https://www.sabcnews.com/sabcnews/batsa-aborts-decision-to-pursue-legal-action-cigarette-sale-ban/</a>                                     |
| 414 | 2020-04-30 | SABC News | Busi Chimombe    | Analyst calls for transparency on government's sale of cigarettes decision     | <a href="https://www.sabcnews.com/sabcnews/analyst-calls-for-transparency-on-governments-sale-of-cigarettes-decision/">https://www.sabcnews.com/sabcnews/analyst-calls-for-transparency-on-governments-sale-of-cigarettes-decision/</a>                 |
| 415 | 2020-04-30 | SABC News | Sashin Naidoo    | Smokers slam government decision to extend ban on cigarettes                   | <a href="https://www.sabcnews.com/sabcnews/smokers-slam-government-decision-to-extend-ban-on-cigarettes/">https://www.sabcnews.com/sabcnews/smokers-slam-government-decision-to-extend-ban-on-cigarettes/</a>                                           |
| 416 | 2020-04-29 | SABC News | Staff Reporter   | Sale of cigarettes will not be allowed under Level-4 lockdown : Dlamini-Zuma   | <a href="https://www.sabcnews.com/sabcnews/sale-of-cigarettes-will-not-be-allowed-under-level-4-lockdown-dlamini-zuma/">https://www.sabcnews.com/sabcnews/sale-of-cigarettes-will-not-be-allowed-under-level-4-lockdown-dlamini-zuma/</a>               |
| 417 | 2020-04-24 | SABC News | Staff Reporter   | NCAS warns of harms associated to cigarettes as ban on sales lifted            | <a href="https://www.sabcnews.com/sabcnews/ncas-warns-of-harms-associated-to-cigarettes-as-ban-on-sales-lifted/">https://www.sabcnews.com/sabcnews/ncas-warns-of-harms-associated-to-cigarettes-as-ban-on-sales-lifted/</a>                             |
| 418 | 2020-04-17 | SABC News | Staff Reporter   | Ban on alcohol sales to remain during lockdown                                 | <a href="https://www.sabcnews.com/sabcnews/ban-on-alcohol-sales-to-remain-during-lockdown/">https://www.sabcnews.com/sabcnews/ban-on-alcohol-sales-to-remain-during-lockdown/</a>                                                                       |
| 419 | 2020-04-17 | SABC News | Horisani Sithole | Police crack-down on illegal sale of alcohol and cigarettes                    | <a href="https://www.sabcnews.com/sabcnews/police-crack-down-on-illegal-sale-of-alcohol-and-cigarettes/">https://www.sabcnews.com/sabcnews/police-crack-down-on-illegal-sale-of-alcohol-and-cigarettes/</a>                                             |
| 420 | 2020-04-06 | SABC News | Wendy Mothata    | FITA urges government to lift the cigarettes ban amid lockdown                 | <a href="https://www.sabcnews.com/sabcnews/fita-urges-government-to-lift-the-cigarettes-ban-amid-lockdown/">https://www.sabcnews.com/sabcnews/fita-urges-government-to-lift-the-cigarettes-ban-amid-lockdown/</a>                                       |
| 421 | 2020-04-01 | SABC News | Horisani Sithole | South Africans addicted to alcohol, cigarettes negatively affected by lockdown | <a href="https://www.sabcnews.com/sabcnews/south-africans-addicted-to-alcohol-and-cigarettes-negatively-affected-by-lockdown/">https://www.sabcnews.com/sabcnews/south-africans-addicted-to-alcohol-and-cigarettes-negatively-affected-by-lockdown/</a> |

|     |            |             |                                              |                                                                               |                                                                                                                                                                                                                                                                                       |
|-----|------------|-------------|----------------------------------------------|-------------------------------------------------------------------------------|---------------------------------------------------------------------------------------------------------------------------------------------------------------------------------------------------------------------------------------------------------------------------------------|
| 422 | 2020-09-16 | SABC News   | Lerato Matlala                               | South Africa moves to Lockdown Level one                                      | <a href="https://www.sabcnews.com/sabcnews/south-africa-moves-to-lockdown-level-one/">https://www.sabcnews.com/sabcnews/south-africa-moves-to-lockdown-level-one/</a>                                                                                                                 |
| 423 | 2020-08-12 | SABC News   | Busi Chimombe                                | DA calls for complete lifting of lockdown                                     | <a href="https://www.sabcnews.com/sabcnews/da-calls-for-complete-lifting-of-lockdown-2/">https://www.sabcnews.com/sabcnews/da-calls-for-complete-lifting-of-lockdown-2/</a>                                                                                                           |
| 424 | 2020-08-07 | SABC News   | Ismael Modiba                                | Pretoria High Court correct to dismiss FITA's application: Government         | <a href="https://www.sabcnews.com/sabcnews/pretoria-high-court-was-correct-to-dismiss-fitas-application-government/">https://www.sabcnews.com/sabcnews/pretoria-high-court-was-correct-to-dismiss-fitas-application-government/</a>                                                   |
| 425 | 2020-08-06 | SABC News   | Staff Reporter                               | Government has until Friday to file its response to FITA's application        | <a href="https://www.sabcnews.com/sabcnews/government-has-until-friday-to-file-its-response-to-fitas-application/">https://www.sabcnews.com/sabcnews/government-has-until-friday-to-file-its-response-to-fitas-application/</a>                                                       |
| 426 | 2020-06-26 | The Citizen | Bernadette Wicks                             | Bad news for smokers: High court says cigarette ban was rational              | <a href="https://citizen.co.za/news/covid-19/breaking-news-covid-19/2309965/bad-news-for-smokers-high-court-says-cigarette-ban-was-rational/">https://citizen.co.za/news/covid-19/breaking-news-covid-19/2309965/bad-news-for-smokers-high-court-says-cigarette-ban-was-rational/</a> |
| 427 | 2020-06-03 | The Citizen | Citizen reporter                             | Court gives govt till Friday 5pm to respond on tobacco ban                    | <a href="https://citizen.co.za/business/business-news/2296301/court-gives-govt-till-friday-5pm-to-respond-on-tobacco-ban/">https://citizen.co.za/business/business-news/2296301/court-gives-govt-till-friday-5pm-to-respond-on-tobacco-ban/</a>                                       |
| 428 | 2020-08-05 | The Citizen | Gopolang Moloko                              | Batsa tobacco ban case against govt 'defining moment' for SA – Tax Justice SA | <a href="https://citizen.co.za/news/south-africa/courts/2335412/batsa-tobacco-ban-case-against-govt-defining-moment-for-sa-tax-justice-sa/">https://citizen.co.za/news/south-africa/courts/2335412/batsa-tobacco-ban-case-against-govt-defining-moment-for-sa-tax-justice-sa/</a>     |
| 429 | 2020-10-29 | The Citizen | Rorisang Kgosana                             | Extended tobacco ban contributed to low tax revenue as debt rises             | <a href="https://citizen.co.za/business/business-news/2376655/extended-tobacco-ban-contributed-to-low-tax-revenue-as-debt-rises/">https://citizen.co.za/business/business-news/2376655/extended-tobacco-ban-contributed-to-low-tax-revenue-as-debt-rises/</a>                         |
| 430 | 2020-05-04 | The Citizen | Professor Francois Steyn and Harriet Klopper | Tobacco ban fuels illegal trade                                               | <a href="https://citizen.co.za/business/business-news/2278209/tobacco-ban-fuels-illegal-trade/">https://citizen.co.za/business/business-news/2278209/tobacco-ban-fuels-illegal-trade/</a>                                                                                             |

|     |            |                  |                                       |                                                                                      |                                                                                                                                                                                                                                                                                                           |
|-----|------------|------------------|---------------------------------------|--------------------------------------------------------------------------------------|-----------------------------------------------------------------------------------------------------------------------------------------------------------------------------------------------------------------------------------------------------------------------------------------------------------|
| 431 | 2020-08-11 | The Citizen      | Bernadette Wicks                      | Tobacco ban is killing smokers                                                       | <a href="https://citizen.co.za/news/south-africa/courts/2339240/tobacco-ban-is-killing-smokers/">https://citizen.co.za/news/south-africa/courts/2339240/tobacco-ban-is-killing-smokers/</a>                                                                                                               |
| 432 | 2020-05-29 | The Citizen      | Staff Reporter                        | British American Tobacco to take legal action over cigarette ban                     | <a href="https://citizen.co.za/business/2293273/british-american-tobacco-to-take-legal-action-over-cigarette-ban/">https://citizen.co.za/business/2293273/british-american-tobacco-to-take-legal-action-over-cigarette-ban/</a>                                                                           |
| 433 | 2020-08-18 | The Citizen      | Gopolang Moloko                       | IN PICS: As smokers, boozers flood outlets, Fita notes possible price hike           | <a href="https://citizen.co.za/news/south-africa/society/2343996/in-pics-as-smokers-boozers-flood-outlets-fita-notes-possible-price-hike/">https://citizen.co.za/news/south-africa/society/2343996/in-pics-as-smokers-boozers-flood-outlets-fita-notes-possible-price-hike/</a>                           |
| 434 | 2020-05-28 | The Citizen      | Makhosandile Zulu                     | Malema says attacks on Dlamini-Zuma and claims of ties to Mazzotti are 'nonsensical' | <a href="https://citizen.co.za/news/covid-19/2292753/malema-says-attacks-on-dlamini-zuma-and-claims-of-ties-to-mazzotti-are-nonsensical/">https://citizen.co.za/news/covid-19/2292753/malema-says-attacks-on-dlamini-zuma-and-claims-of-ties-to-mazzotti-are-nonsensical/</a>                             |
| 435 | 2020-05-07 | The Citizen      | Staff Reporter                        | Government will not publish cigarette ban U-turn minutes due to 'classified' status  | <a href="https://citizen.co.za/news/south-africa/government/2280543/government-will-not-publish-cigarette-ban-u-turn-minutes-due-to-classified-status/">https://citizen.co.za/news/south-africa/government/2280543/government-will-not-publish-cigarette-ban-u-turn-minutes-due-to-classified-status/</a> |
| 436 | 2020-06-10 | The Citizen      | Bernadette Wicks                      | Fita argues against government's 'obsession' with cigarettes                         | <a href="https://citizen.co.za/news/south-africa/courts/2300064/watch-fita-argues-against-governments-obsession-with-cigarettes/">https://citizen.co.za/news/south-africa/courts/2300064/watch-fita-argues-against-governments-obsession-with-cigarettes/</a>                                             |
| 437 | 2020-06-02 | The Citizen      | Rorisang Kgosana                      | Smokers' march goes up in smoke                                                      | <a href="https://citizen.co.za/premium/2295565/smokers-march-goes-up-in-smoke/">https://citizen.co.za/premium/2295565/smokers-march-goes-up-in-smoke/</a>                                                                                                                                                 |
| 438 | 2020-07-29 | The Citizen      | Staff Reporter                        | Smoking', 'lack of social distancing' at Mlangeni's funeral causes uproar on Twitter | <a href="https://citizen.co.za/news/south-africa/social-media/2331317/smoking-lack-of-social-distancing-at-mlangenis-funeral-causes-uproar-on-twitter/">https://citizen.co.za/news/south-africa/social-media/2331317/smoking-lack-of-social-distancing-at-mlangenis-funeral-causes-uproar-on-twitter/</a> |
| 439 | 2020-03-30 | The Conversation | Benjamin T H Smart and Alex Broadbent | SA's Covid-19 lockdown: Smokes and outdoor exercise could ease the tension           | <a href="https://theconversation.com/south-africas-covid-19-lockdown-cigarettes-and-outdoor-exercise-could-ease-the-tension-134931">https://theconversation.com/south-africas-covid-19-lockdown-cigarettes-and-outdoor-exercise-could-ease-the-tension-134931</a>                                         |

|     |            |               |                       |                                                                            |                                                                                                                                                                                                                                                                                       |
|-----|------------|---------------|-----------------------|----------------------------------------------------------------------------|---------------------------------------------------------------------------------------------------------------------------------------------------------------------------------------------------------------------------------------------------------------------------------------|
| 440 | 2020-06-03 | TimesLI<br>VE | Ernest Mabuza         | Ban on cigarettes will not make people quit smoking, Fita tells high court | <a href="https://www.timeslive.co.za/news/south-africa/2020-06-03-ban-on-cigarettes-will-not-make-people-quit-smoking-fita-tells-high-court/">https://www.timeslive.co.za/news/south-africa/2020-06-03-ban-on-cigarettes-will-not-make-people-quit-smoking-fita-tells-high-court/</a> |
| 441 | 2020-05-28 | TimesLI<br>VE | Shonisani Tshikalange | Cardiologist questions government ban aimed at smokers                     | <a href="https://www.timeslive.co.za/news/south-africa/2020-05-28-cardiologist-questions-government-ban-aimed-at-smokers/">https://www.timeslive.co.za/news/south-africa/2020-05-28-cardiologist-questions-government-ban-aimed-at-smokers/</a>                                       |
